# Supplementary material for: In vivo targeted and deterministic single-cell malignant transformation
Source: eLife. 2025 Mar 25;13:RP97650. doi: 10.7554/eLife.97650 (PMC11936417; doi:10.7554/eLife.97650)
Supplement: Figure 1—figure supplement 5—source data 1. — mRNA was extracted from whole single (or groups of a few) embryos and analyzed on a Biomark HD system as described in Materials and methods. [file elife-97650-fig1-figsupp5-data1.xlsx]

## Sheet: conditions
ARN_Ventx
Sample	Type	Description	Phenotype	# embryos	replica #	Reproduction date	Extraction date	Concentration ng/µL
1_1	Control	KRAS	Group		1	19/05/2020 (embryo injection)- 25/05/2020 (fixation)	30.6.20	248.4
1_2	Control	KRAS	Group	5	2	26/05/2020 (embryo injection)- 01/06/2020 (fixation)	30.6.20	134.3
1_3	Control	KRAS	Group	5	3	02/06/2020 (embryo injection)- 08/06/2020 (fixation)	30.6.20	103.8
2_1	Control	KRAS + DEX	Group	5	1	19/05/2020 (embryo injection)- 25/05/2020 (fixation)	30.6.20	141.8
2_2	Control	KRAS + DEX	Group	5	2	26/05/2020 (embryo injection)- 01/06/2020 (fixation)	30.6.20	53.9
2_3	Control	KRAS + DEX	Group	5	3	02/06/2020 (embryo injection)- 08/06/2020 (fixation)	30.6.20	134.6
3_1	Control	KRAS + cCyc w/o UV	Group	5	1	19/05/2020 (embryo injection)- 25/05/2020 (fixation)	30.6.20	144.2
3_2	Control	KRAS + cCyc w/o UV	Group	5	2	26/05/2020 (embryo injection)- 01/06/2020 (fixation)	30.6.20	70
3_3	Control	KRAS + cCyc w/o UV	Group	5	3	02/06/2020 (embryo injection)- 08/06/2020 (fixation)	30.6.20	79.9
4_1	Control	KRAS + cCyc w/o UV + DEX	Group	5	1	19/05/2020 (embryo injection)- 25/05/2020 (fixation)	30.6.20	163.9
4_2	Control	KRAS + cCyc w/o UV + DEX	Group	5	2	26/05/2020 (embryo injection)- 01/06/2020 (fixation)	30.6.20	29
4_3	Control	KRAS + cCyc w/o UV + DEX	Group	5	3	02/06/2020 (embryo injection)- 08/06/2020 (fixation)	30.6.20	37.7
5_1	TEST	KRAS + cCyc + UV	Group	5	1	19/05/2020 (embryo injection)- 25/05/2020 (fixation)	30.6.20	112.2
5_2	TEST	KRAS + cCyc + UV	Group	5	2	26/05/2020 (embryo injection)- 01/06/2020 (fixation)	30.6.20	90.6
5_3	TEST	KRAS + cCyc + UV	Group	5	3	02/06/2020 (embryo injection)- 08/06/2020 (fixation)	30.6.20	87.5
6_1	TEST	KRAS + cCyc + UV + DEX	Group	5	1	19/05/2020 (embryo injection)- 25/05/2020 (fixation)	30.6.20	150.9
6_2	TEST	KRAS + cCyc + UV + DEX	Group	5	2	26/05/2020 (embryo injection)- 01/06/2020 (fixation)	30.6.20	41.3
6_3	TEST	KRAS + cCyc + UV + DEX	Group	5	3	02/06/2020 (embryo injection)- 08/06/2020 (fixation)	30.6.20	74.9
8_1	TEST	KRAS + VENTX2_GR + DEX	Group	5	1	19/05/2020 (embryo injection)- 25/05/2020 (fixation)	1.7.20	46.7
8_2	TEST	KRAS + VENTX2_GR + DEX	Group	5	2	26/05/2020 (embryo injection)- 01/06/2020 (fixation)	1.7.20	106.7
8_3	TEST	KRAS + VENTX2_GR + DEX	Group	5	3	02/06/2020 (embryo injection)- 08/06/2020 (fixation)	1.7.20	109.7
7_1_S	TEST	KRAS + cCyc + UV + VENTX2_GR + DEX	Group Strong	4	1	19/05/2020 (embryo injection)- 25/05/2020 (fixation)	30.6.20	97.4
7_2_S	TEST	KRAS + cCyc + UV + VENTX2_GR + DEX	Group Strong	6	2	26/05/2020 (embryo injection)- 01/06/2020 (fixation)	30.6.20	24.6
7_3_S	TEST	KRAS + cCyc + UV + VENTX2_GR + DEX	Group Strong	3	2	26/05/2020 (embryo injection)- 01/06/2020 (fixation)	1.7.20	25.4
7_1_2	TEST	KRAS + cCyc + UV + VENTX2_GR + DEX	Single Strong +++	1	1	19/05/2020 (embryo injection)- 25/05/2020 (fixation)	30.6.20	44.1
7_1_3	TEST	KRAS + cCyc + UV + VENTX2_GR + DEX	Single Strong +++	1	1	19/05/2020 (embryo injection)- 25/05/2020 (fixation)	1.7.20	58.6
7_1_4	TEST	KRAS + cCyc + UV + VENTX2_GR + DEX	Single Strong ++++	1	1	19/05/2020 (embryo injection)- 25/05/2020 (fixation)	1.7.20	28.1
7_2_1	TEST	KRAS + cCyc + UV + VENTX2_GR + DEX	Single Strong ++++	1	2	26/05/2020 (embryo injection)- 01/06/2020 (fixation)	30.6.20	21.2
7_2_8	TEST	KRAS + cCyc + UV + VENTX2_GR + DEX	Single Strong +++	1	2	26/05/2020 (embryo injection)- 01/06/2020 (fixation)	1.7.20	16
7_2_10	TEST	KRAS + cCyc + UV + VENTX2_GR + DEX	Single Strong +++	1	2	26/05/2020 (embryo injection)- 01/06/2020 (fixation)	1.7.20	7
7_3_1	TEST	KRAS + cCyc + UV + VENTX2_GR + DEX	Single Strong +++	1	3	02/06/2020 (embryo injection)- 08/06/2020 (fixation)	30.6.20	47.8
7_3_2	TEST	KRAS + cCyc + UV + VENTX2_GR + DEX	Single Strong +++	1	3	02/06/2020 (embryo injection)- 08/06/2020 (fixation)	1.7.20	20.4
7_3_3	TEST	KRAS + cCyc + UV + VENTX2_GR + DEX	Single Strong ++++	1	3	02/06/2020 (embryo injection)- 08/06/2020 (fixation)	1.7.20	30.7
7_3_4	TEST	KRAS + cCyc + UV + VENTX2_GR + DEX	Single Strong +++	1	3	02/06/2020 (embryo injection)- 08/06/2020 (fixation)	1.7.20	44.3
7_1_L	TEST	KRAS + cCyc + UV + VENTX2_GR + DEX	Group Low	3	1	19/05/2020 (embryo injection)- 25/05/2020 (fixation)	1.7.20	49.5
7_2_L	TEST	KRAS + cCyc + UV + VENTX2_GR + DEX	Group Low	6	2	26/05/2020 (embryo injection)- 01/06/2020 (fixation)	1.7.20	137.8
7_3_L	TEST	KRAS + cCyc + UV + VENTX2_GR + DEX	Group Low	3	3	02/06/2020 (embryo injection)- 08/06/2020 (fixation)	1.7.20	51.4
7_1_5	TEST	KRAS + cCyc + UV + VENTX2_GR + DEX	Single Low +	1	1	19/05/2020 (embryo injection)- 25/05/2020 (fixation)	1.7.20	38.9
7_2_2	TEST	KRAS + cCyc + UV + VENTX2_GR + DEX	Single Low ++ (intestin outgrowth)	1	2	26/05/2020 (embryo injection)- 01/06/2020 (fixation)	30.6.20	23
7_2_3	TEST	KRAS + cCyc + UV + VENTX2_GR + DEX	Single Low ++ (intestin outgrowth)	1	2	26/05/2020 (embryo injection)- 01/06/2020 (fixation)	1.7.20	6.7
7_2_4	TEST	KRAS + cCyc + UV + VENTX2_GR + DEX	Single Low ++ (intestin outgrowth)	1	2	26/05/2020 (embryo injection)- 01/06/2020 (fixation)	1.7.20	74.8
7_2_5	TEST	KRAS + cCyc + UV + VENTX2_GR + DEX	Single Low + (WT-like)	1	2	26/05/2020 (embryo injection)- 01/06/2020 (fixation)	1.7.20	35.6
7_3_5	TEST	KRAS + cCyc + UV + VENTX2_GR + DEX	Single Low +	1	3	02/06/2020 (embryo injection)- 08/06/2020 (fixation)	1.7.20	31.9

## Sheet: 1131436044_data_48.48_Ventx_200
Chip Run Info,G:\Projets\Ventx\Ventx_200617\1131436044_48.48_Ventx_200709\ChipRun.bml,1131436044,48.48 (113x),GE 48x48 Standard v2,ROX,FAM-MGB,7/9/2020 3:28:11 PM,01:30:56,BIOMARKHD127,SamplePlateName: Undefined,SamplePlateBarCode: Undefined,ReagentPlateName: Undefined,ReagentPlateBarCode: Undefined
Application Version,4.3.1
Application Build,20170404.1035
Export Type,Table Results
Quality Threshold,0.65
Baseline Correction Method,Linear (Derivative)
Ct Threshold Method,Auto (Detectors)
Experiment Information	Experiment Information	Experiment Information	Experiment Information	Experiment Information	Experiment Information	FAM-MGB	FAM-MGB	FAM-MGB	FAM-MGB	FAM-MGB
Chamber	Sample	Sample	Sample	FAM-MGB	FAM-MGB	Ct	Ct	Ct	Ct	Ct
ID	Name	Type	rConc	Name	Type	Value	Calibrated rConc	Quality	Call	Threshold
S01-A01	1_1	Unknown	1	actb1	Test	6.13973944763581	87.6547030253188	0.841414858224091	Pass	0.00515123486432751
S01-A02	1_1	Unknown	1	dnmt1	Test	9.20311529794603	95.2936606137847	1	Pass	0.00838036413701631
S01-A03	1_1	Unknown	1	Fgfr4	Test	9.70981432072257	109.058389634285	1	Pass	0.00765676153628628
S01-A04	1_1	Unknown	1	jmjd6	Test	9.17174292687389	100.949307668226	1	Pass	0.0067923511426121
S01-A05	1_1	Unknown	1	neil1	Test	8.98582164964368	122.65256281527	1	Pass	0.0078521262809567
S01-A06	1_1	Unknown	1	tdg.1	Test	9.8779922017749	136.832659257978	0.928844982952803	Pass	0.00651112676535075
S01-A07	1_1	Unknown	1	Fgf4	Test	13.2117784843686	188.520314346048	0.960077729481957	Pass	0.00585753619118968
S01-A08	1_1	Unknown	1	dnmt3aa	Test	9.41269944052404	94.4293610594381	1	Pass	0.00720457938855895
S01-A09	1_1	Unknown	1	foxo3a	Test	7.28643064261421	129.34427268879	0.961353058568938	Pass	0.00894309864058025
S01-A10	1_1	Unknown	1	kdm2aa	Test	8.51513211040412	117.953425841484	1	Pass	0.00799264174920814
S01-A11	1_1	Unknown	1	ogt.1	Test	8.69969706614639	105.849612264505	1	Pass	0.00580787823573391
S01-A12	1_1	Unknown	1	tert	Test	14.1206310268832	135.169042786176	0.965312750795817	Pass	0.00846945269463405
S01-A13	1_1	Unknown	1	Aldh1a2	Test	10.3283030539177	106.964609109796	1	Pass	0.00632939983004382
S01-A14	1_1	Unknown	1	dnmt3ab	Test	8.18226246009519	130.827128923865	1	Pass	0.00931843179675896
S01-A15	1_1	Unknown	1	gadd45aa	Test	10.491861835464	115.558802876552	1	Pass	0.00880831281487657
S01-A16	1_1	Unknown	1	kdm4b/jmjd2b	Test	8.9085323539209	104.419867611223	1	Pass	0.00927896985905001
S01-A17	1_1	Unknown	1	pou5f3	Test	16.8770630227535	-1	0.917619815979615	Pass	0.00450652254380955
S01-A18	1_1	Unknown	1	tet3	Test	8.46766666592527	127.497020233082	1	Pass	0.00750583387196605
S01-A19	1_1	Unknown	1	Axin2	Test	8.8979730914716	84.4920886974034	1	Pass	0.00461906985014386
S01-A20	1_1	Unknown	1	dnmt3ba	Test	10.3319222008483	134.987448551629	0.984269587535272	Pass	0.00597259676966606
S01-A21	1_1	Unknown	1	gadd45ab	Test	8.55010960713551	156.121540794747	1	Pass	0.00665105353454544
S01-A22	1_1	Unknown	1	lats1	Test	9.15891894483358	119.441052066454	1	Pass	0.00662357811419632
S01-A23	1_1	Unknown	1	Rarab	Test	8.95281852271521	128.19199614727	1	Pass	0.00787731352009684
S01-A24	1_1	Unknown	1	ved	Test	11.7288405031083	144.678419250933	0.921449577458963	Pass	0.00621567465591404
S01-A25	1_1	Unknown	1	cdkn2c	Test	12.707657631148	219.551312692029	1	Pass	0.00783619584131053
S01-A26	1_1	Unknown	1	dnmt3bb.1	Test	10.746646320375	226.123526271367	0.972973352747339	Pass	0.00423247310552466
S01-A27	1_1	Unknown	1	hdac1	Test	8.55125859743699	99.8747137908723	0.980181845843103	Pass	0.00482340564875717
S01-A28	1_1	Unknown	1	lin28a	Test	13.5970735078034	139.566692980597	1	Pass	0.00685732601660462
S01-A29	1_1	Unknown	1	Rpl13a1	Test	3.96498952892393	104.56557385369	0.654996509641311	Pass	0.0103523231385501
S01-A30	1_1	Unknown	1	vent
S01-A31	1_1	Unknown	1	Crabp1b	Test	12.1787955057347	81.2130865345893	0.97797059477705	Pass	0.00704322330326988
S01-A32	1_1	Unknown	1	Dusp6	Test	6.6947456831415	113.894098052655	1	Pass	0.0114011679183338
S01-A33	1_1	Unknown	1	Ifg1rb	Test	8.88808926893158	122.053133531719	1	Pass	0.00843121681178218
S01-A34	1_1	Unknown	1	mycb	Test	8.50699626208633	139.367274066429	1	Pass	0.00834510025919904
S01-A35	1_1	Unknown	1	Rpl13a2	Test	3.77945394990721	98.4942444515531	0.593151316635738	Fail	0.00967061280246088
S01-A36	1_1	Unknown	1	vox	Test	14.6946866070425	81.7970005037794	1	Pass	0.00881965691216683
S01-A37	1_1	Unknown	1	Crabp2a	Test	10.0906643175689	102.797893890757	1	Pass	0.00685417042127909
S01-A38	1_1	Unknown	1	ezh2	Test	11.2714983915042	115.625749485958	1	Pass	0.00764759834232412
S01-A39	1_1	Unknown	1	Igf1	Test	12.5550065000687	149.474520326391	1	Pass	0.0083332072578722
S01-A40	1_1	Unknown	1	mycla	Test	11.3343547347816	102.891158995248	1	Pass	0.0127686116084135
S01-A41	1_1	Unknown	1	sall4	Test	11.8755360046024	105.084036347756	1	Pass	0.00681715441030155
S01-A42	1_1	Unknown	1	xpc	Test	9.46392144935488	129.529208363781	0.998857756678281	Pass	0.00548824355156608
S01-A43	1_1	Unknown	1	Cyp26a1	Test	11.1389961158046	166.74656975714	1	Pass	0.00883074677869744
S01-A44	1_1	Unknown	1	Fgf8a
S01-A45	1_1	Unknown	1	Igf1ra	Test	8.67443795932469	127.164540158734	1	Pass	0.00648470647509694
S01-A46	1_1	Unknown	1	nanog	Test	17.5518715491578	49.7250062395803	1	Pass	0.0080293555926136
S01-A47	1_1	Unknown	1	spop	Test	8.97842291407357	116.732018394329	1	Pass	0.00683061453397148
S01-A48	1_1	Unknown	1	yap1	Test	8.46654521017481	201.383810134327	0.920820547410346	Pass	0.00384749366749803
S07-A01	1_2	Unknown	1	actb1	Test	5.53836263082588	134.019284015152	0.923445764120047	Pass	0.00515123486432751
S07-A02	1_2	Unknown	1	dnmt1	Test	9.35824048437473	87.3818926858292	1	Pass	0.00838036413701631
S07-A03	1_2	Unknown	1	Fgfr4	Test	9.65202636805171	112.741249241533	1	Pass	0.00765676153628628
S07-A04	1_2	Unknown	1	jmjd6	Test	9.85194610932257	68.6761477233038	1	Pass	0.0067923511426121
S07-A05	1_2	Unknown	1	neil1	Test	9.90988634094283	62.5819120156033	1	Pass	0.0078521262809567
S07-A06	1_2	Unknown	1	tdg.1	Test	9.98909467773698	125.373851352738	0.98152294295325	Pass	0.00651112676535075
S07-A07	1_2	Unknown	1	Fgf4	Test	11.6888975998737	875.79998696563	1	Pass	0.00585753619118968
S07-A08	1_2	Unknown	1	dnmt3aa	Test	9.27578012839772	102.328560078555	1	Pass	0.00720457938855895
S07-A09	1_2	Unknown	1	foxo3a	Test	7.28185023741251	129.770972689876	0.96447777453927	Pass	0.00894309864058025
S07-A10	1_2	Unknown	1	kdm2aa	Test	8.69205077322328	104.15643393209	1	Pass	0.00799264174920814
S07-A11	1_2	Unknown	1	ogt.1	Test	8.98813790822874	88.2648393398873	1	Pass	0.00580787823573391
S07-A12	1_2	Unknown	1	tert	Test	13.3961352878017	250.278368579055	1	Pass	0.00846945269463405
S07-A13	1_2	Unknown	1	Aldh1a2	Test	9.95484319616535	140.534148014524	1	Pass	0.00632939983004382
S07-A14	1_2	Unknown	1	dnmt3ab	Test	8.30173863353903	119.86665301946	1	Pass	0.00931843179675896
S07-A15	1_2	Unknown	1	gadd45aa	Test	9.47723564131628	257.29727410243	1	Pass	0.00880831281487657
S07-A16	1_2	Unknown	1	kdm4b/jmjd2b	Test	9.13687197165641	90.1994458829634	1	Pass	0.00927896985905001
S07-A17	1_2	Unknown	1	pou5f3	Test	17.5589824563764	-1	0.880521069739449	Pass	0.00450652254380955
S07-A18	1_2	Unknown	1	tet3	Test	8.46547299167999	127.690500001716	1	Pass	0.00750583387196605
S07-A19	1_2	Unknown	1	Axin2	Test	8.88079019358414	85.2672505168905	0.991823169346199	Pass	0.00461906985014386
S07-A20	1_2	Unknown	1	dnmt3ba	Test	10.7051320157007	105.193176036578	1	Pass	0.00597259676966606
S07-A21	1_2	Unknown	1	gadd45ab	Test	8.19503481199513	208.342748285339	1	Pass	0.00665105353454544
S07-A22	1_2	Unknown	1	lats1	Test	9.60987391328151	89.1414634227228	1	Pass	0.00662357811419632
S07-A23	1_2	Unknown	1	Rarab	Test	8.96498185904925	127.050972330739	1	Pass	0.00787731352009684
S07-A24	1_2	Unknown	1	ved	Test	12.3081836564101	96.7052445123543	0.914349197266716	Pass	0.00621567465591404
S07-A25	1_2	Unknown	1	cdkn2c	Test	12.6631274422429	227.428273653002	1	Pass	0.00783619584131053
S07-A26	1_2	Unknown	1	dnmt3bb.1	Test	11.2023356019524	158.700419944092	0.961118827197676	Pass	0.00423247310552466
S07-A27	1_2	Unknown	1	hdac1	Test	8.39736200159368	110.347211719848	0.960988615980515	Pass	0.00482340564875717
S07-A28	1_2	Unknown	1	lin28a	Test	12.6134796647513	325.179519109051	1	Pass	0.00685732601660462
S07-A29	1_2	Unknown	1	Rpl13a1	Test	3.95461993652223	105.392685151553	0.651539978840742	Pass	0.0103523231385501
S07-A30	1_2	Unknown	1	vent
S07-A31	1_2	Unknown	1	Crabp1b	Test	11.3667960018858	132.496080790383	0.997437586641018	Pass	0.00704322330326988
S07-A32	1_2	Unknown	1	Dusp6	Test	6.29683225450274	151.756954942551	1	Pass	0.0114011679183338
S07-A33	1_2	Unknown	1	Ifg1rb	Test	8.77760127051801	132.005203381878	1	Pass	0.00843121681178218
S07-A34	1_2	Unknown	1	mycb	Test	8.05776367693033	194.10245511782	1	Pass	0.00834510025919904
S07-A35	1_2	Unknown	1	Rpl13a2	Test	3.85368987715959	93.0060291629539	0.617896625719865	Fail	0.00967061280246088
S07-A36	1_2	Unknown	1	vox	Test	15.1555346180627	56.3752016910497	1	Pass	0.00881965691216683
S07-A37	1_2	Unknown	1	Crabp2a	Test	9.3732133796354	161.55874802482	1	Pass	0.00685417042127909
S07-A38	1_2	Unknown	1	ezh2	Test	11.2925214146425	114.005471233015	1	Pass	0.00764759834232412
S07-A39	1_2	Unknown	1	Igf1	Test	12.7032244061886	135.129285088826	1	Pass	0.0083332072578722
S07-A40	1_2	Unknown	1	mycla	Test	11.5409388571431	89.8470604128597	1	Pass	0.0127686116084135
S07-A41	1_2	Unknown	1	sall4	Test	11.5824893303641	124.638241986416	0.966885040162228	Pass	0.00681715441030155
S07-A42	1_2	Unknown	1	xpc	Test	11.2133540570155	37.9610711101553	0.976714862177378	Pass	0.00548824355156608
S07-A43	1_2	Unknown	1	Cyp26a1	Test	11.0086417124804	183.325788227947	1	Pass	0.00883074677869744
S07-A44	1_2	Unknown	1	Fgf8a
S07-A45	1_2	Unknown	1	Igf1ra	Test	8.2289483178007	177.02016709944	0.975139197690783	Pass	0.00648470647509694
S07-A46	1_2	Unknown	1	nanog	Test	18.6900726318962	1841.62527583396	1	Pass	0.0080293555926136
S07-A47	1_2	Unknown	1	spop	Test	8.71823318127783	141.459502014476	1	Pass	0.00683061453397148
S07-A48	1_2	Unknown	1	yap1	Test	7.92558028478911	297.7147057926	1	Pass	0.00384749366749803
S13-A01	1_3	Unknown	1	actb1	Test	5.34919129791183	153.168814306679	0.869278367183467	Pass	0.00515123486432751
S13-A02	1_3	Unknown	1	dnmt1	Test	9.45422744804991	82.8188740161568	1	Pass	0.00838036413701631
S13-A03	1_3	Unknown	1	Fgfr4	Test	9.49583613387824	123.329685990022	1	Pass	0.00765676153628628
S13-A04	1_3	Unknown	1	jmjd6	Test	10.1585668594655	57.7287163701479	1	Pass	0.0067923511426121
S13-A05	1_3	Unknown	1	neil1	Test	9.92730621360234	61.7930934737666	1	Pass	0.0078521262809567
S13-A06	1_3	Unknown	1	tdg.1	Test	9.65355468683514	163.274596008491	0.93731914356259	Pass	0.00651112676535075
S13-A07	1_3	Unknown	1	Fgf4	Test	12.2316355805912	506.613555793454	0.970752945936796	Pass	0.00585753619118968
S13-A08	1_3	Unknown	1	dnmt3aa	Test	9.14269943182294	110.639070340528	0.996842895103094	Pass	0.00720457938855895
S13-A09	1_3	Unknown	1	foxo3a	Test	7.23243866819276	134.464509976887	0.947207839124942	Pass	0.00894309864058025
S13-A10	1_3	Unknown	1	kdm2aa	Test	8.94983561171538	86.8896579842598	1	Pass	0.00799264174920814
S13-A11	1_3	Unknown	1	ogt.1	Test	8.86740678453137	95.2386267233835	1	Pass	0.00580787823573391
S13-A12	1_3	Unknown	1	tert	Test	13.2751421745132	277.398666367994	0.975254017688633	Pass	0.00846945269463405
S13-A13	1_3	Unknown	1	Aldh1a2	Test	9.71179806404603	167.852584662815	0.996939362579669	Pass	0.00632939983004382
S13-A14	1_3	Unknown	1	dnmt3ab	Test	8.05227796396928	143.892917265768	0.978944981057821	Pass	0.00931843179675896
S13-A15	1_3	Unknown	1	gadd45aa	Test	9.8196494675194	196.388949957408	1	Pass	0.00880831281487657
S13-A16	1_3	Unknown	1	kdm4b/jmjd2b	Test	9.13362514576692	90.3874056600465	1	Pass	0.00927896985905001
S13-A17	1_3	Unknown	1	pou5f3	Test	17.0267936724999	-1	0.851577853157222	Pass	0.00450652254380955
S13-A18	1_3	Unknown	1	tet3	Test	8.43851668690048	130.092126748408	1	Pass	0.00750583387196605
S13-A19	1_3	Unknown	1	Axin2	Test	8.85028803327208	86.6608347397214	1	Pass	0.00461906985014386
S13-A20	1_3	Unknown	1	dnmt3ba	Test	10.3743726321988	131.212205554902	0.97927355034229	Pass	0.00597259676966606
S13-A21	1_3	Unknown	1	gadd45ab	Test	8.78977069412437	128.493129856924	1	Pass	0.00665105353454544
S13-A22	1_3	Unknown	1	lats1	Test	9.5475522383928	92.8199397238045	1	Pass	0.00662357811419632
S13-A23	1_3	Unknown	1	Rarab	Test	8.76476374027343	147.195276821987	1	Pass	0.00787731352009684
S13-A24	1_3	Unknown	1	ved	Test	12.5349520150654	82.5979135587179	0.90885289611026	Pass	0.00621567465591404
S13-A25	1_3	Unknown	1	cdkn2c	Test	12.2473418746319	316.0687903392	0.985924009652802	Pass	0.00783619584131053
S13-A26	1_3	Unknown	1	dnmt3bb.1	Test	11.7519681759954	103.540486717505	1	Pass	0.00423247310552466
S13-A27	1_3	Unknown	1	hdac1	Test	8.20440101840179	125.043097782473	0.919198960334953	Pass	0.00482340564875717
S13-A28	1_3	Unknown	1	lin28a	Test	13.4835227674989	153.882566807181	1	Pass	0.00685732601660462
S13-A29	1_3	Unknown	1	Rpl13a1	Test	3.90918950847504	109.094169706441	0.636396502825012	Fail	0.0103523231385501
S13-A30	1_3	Unknown	1	vent
S13-A31	1_3	Unknown	1	Crabp1b	Test	11.7785489919774	103.373294642847	1	Pass	0.00704322330326988
S13-A32	1_3	Unknown	1	Dusp6	Test	6.49144287902888	131.88224616769	1	Pass	0.0114011679183338
S13-A33	1_3	Unknown	1	Ifg1rb	Test	8.95166753151929	116.670223852598	1	Pass	0.00843121681178218
S13-A34	1_3	Unknown	1	mycb	Test	8.35756003774272	155.603340641085	1	Pass	0.00834510025919904
S13-A35	1_3	Unknown	1	Rpl13a2	Test	3.79093081787945	97.6250689976742	0.596976939293151	Fail	0.00967061280246088
S13-A36	1_3	Unknown	1	vox	Test	15.4049178109441	46.0906950997651	1	Pass	0.00881965691216683
S13-A37	1_3	Unknown	1	Crabp2a	Test	9.7916492304539	124.112717839484	1	Pass	0.00685417042127909
S13-A38	1_3	Unknown	1	ezh2	Test	11.1441390111097	125.945829668555	1	Pass	0.00764759834232412
S13-A39	1_3	Unknown	1	Igf1	Test	12.6280032735683	142.228659754905	1	Pass	0.0083332072578722
S13-A40	1_3	Unknown	1	mycla	Test	11.5373758384701	90.0573769634488	1	Pass	0.0127686116084135
S13-A41	1_3	Unknown	1	sall4	Test	11.6273107144482	121.427070598929	0.993454651163828	Pass	0.00681715441030155
S13-A42	1_3	Unknown	1	xpc	Test	11.0793289437563	41.7036587777755	0.9296795080042	Pass	0.00548824355156608
S13-A43	1_3	Unknown	1	Cyp26a1	Test	11.5265541807807	125.795149552792	1	Pass	0.00883074677869744
S13-A44	1_3	Unknown	1	Fgf8a
S13-A45	1_3	Unknown	1	Igf1ra	Test	8.87799426472934	109.326481475125	1	Pass	0.00648470647509694
S13-A46	1_3	Unknown	1	nanog	Test	18.4836874933088	956.684948098963	0.9771592618548	Pass	0.0080293555926136
S13-A47	1_3	Unknown	1	spop	Test	8.79984676391777	133.186091409033	1	Pass	0.00683061453397148
S13-A48	1_3	Unknown	1	yap1	Test	8.06122738153956	269.916216482415	0.86956822252478	Pass	0.00384749366749803
S19-A01	2_1	Unknown	1	actb1	Test	4.5	278.96289195025	0	Fail	0.00515123486432751
S19-A02	2_1	Unknown	1	dnmt1	Test	9.5	80.7276272836724	1	Pass	0.00838036413701631
S19-A03	2_1	Unknown	1	Fgfr4	Test	11.5	38.97913231137	0	Fail	0.00765676153628628
S19-A04	2_1	Unknown	1	jmjd6	Test	12.5	15.3289159369815	0.981609039112007	Pass	0.0067923511426121
S19-A05	2_1	Unknown	1	neil1	Test	37.5	1.17843074205678E-07	0	Fail	0.0078521262809567
S19-A06	2_1	Unknown	1	tdg.1	Test	2.93829973417971	32260.7691139204	0	Fail	0.00651112676535075
S19-A07	2_1	Unknown	1	Fgf4	Test	10.5	2905.10318634445	0	Fail	0.00585753619118968
S19-A08	2_1	Unknown	1	dnmt3aa	Test	20.3111593122458	0.157746197883472	0.822316896033065	Pass	0.00720457938855895
S19-A09	2_1	Unknown	1	foxo3a	Test	999	-1	0	Fail	0.00894309864058025
S19-A10	2_1	Unknown	1	kdm2aa	Test	36.4177745231582	3.558517923702E-07	0	Fail	0.00799264174920814
S19-A11	2_1	Unknown	1	ogt.1	Test	3.2805900024616	3214.09460718359	0	Fail	0.00580787823573391
S19-A12	2_1	Unknown	1	tert	Test	999	-1	0	Fail	0.00846945269463405
S19-A13	2_1	Unknown	1	Aldh1a2	Test	3.36712800579703	17330.9117415857	0	Fail	0.00632939983004382
S19-A14	2_1	Unknown	1	dnmt3ab	Test	2.5	8393.49896188942	0.0816683018284054	Fail	0.00931843179675896
S19-A15	2_1	Unknown	1	gadd45aa	Test	3.24170677012011	35225.5487943706	0.359466073929209	Fail	0.00880831281487657
S19-A16	2_1	Unknown	1	kdm4b/jmjd2b	Test	3.11045233778909	4297.44500001204	0.11	Fail	0.00927896985905001
S19-A17	2_1	Unknown	1	pou5f3	Test	3.36876957581311	-1	0.336951632557637	Fail	0.00450652254380955
S19-A18	2_1	Unknown	1	tet3	Test	999	-1	0	Fail	0.00750583387196605
S19-A19	2_1	Unknown	1	Axin2	Test	999	-1	0	Fail	0.00461906985014386
S19-A20	2_1	Unknown	1	dnmt3ba	Test	2.9082232812983	19260.05098943	0.135954039566804	Fail	0.00597259676966606
S19-A21	2_1	Unknown	1	gadd45ab	Test	2.5	21316.2687172195	0.0712438151653289	Fail	0.00665105353454544
S19-A22	2_1	Unknown	1	lats1	Test	999	-1	0	Fail	0.00662357811419632
S19-A23	2_1	Unknown	1	Rarab	Test	999	-1	0	Fail	0.00787731352009684
S19-A24	2_1	Unknown	1	ved	Test	4.5	22050.3230237872	0.05	Fail	0.00621567465591404
S19-A25	2_1	Unknown	1	cdkn2c	Test	13.3815525025851	128.785526295734	0.871870285646361	Pass	0.00783619584131053
S19-A26	2_1	Unknown	1	dnmt3bb.1	Test	999	-1	0	Fail	0.00423247310552466
S19-A27	2_1	Unknown	1	hdac1	Test	999	-1	0	Fail	0.00482340564875717
S19-A28	2_1	Unknown	1	lin28a	Test	2.5	1946211.70152991	0.139948629625592	Fail	0.00685732601660462
S19-A29	2_1	Unknown	1	Rpl13a1	Test	2.5	318.27608734371	0.03	Fail	0.0103523231385501
S19-A30	2_1	Unknown	1	vent
S19-A31	2_1	Unknown	1	Crabp1b	Test	2.5	27763.9712141791	0.06	Fail	0.00704322330326988
S19-A32	2_1	Unknown	1	Dusp6	Test	999	-1	0	Fail	0.0114011679183338
S19-A33	2_1	Unknown	1	Ifg1rb	Test	38.5	9.18151492709931E-08	0	Fail	0.00843121681178218
S19-A34	2_1	Unknown	1	mycb	Test	999	-1	0	Fail	0.00834510025919904
S19-A35	2_1	Unknown	1	Rpl13a2	Test	18.5	0.001137463313609	0	Fail	0.00967061280246088
S19-A36	2_1	Unknown	1	vox	Test	2.5	1549545.85934388	0	Fail	0.00881965691216683
S19-A37	2_1	Unknown	1	Crabp2a	Test	999	-1	0	Fail	0.00685417042127909
S19-A38	2_1	Unknown	1	ezh2	Test	12.5	50.6883359258501	0	Fail	0.00764759834232412
S19-A39	2_1	Unknown	1	Igf1	Test	2.5	140323.612427049	0	Fail	0.0083332072578722
S19-A40	2_1	Unknown	1	mycla	Test	37.5	3.59301454993936E-06	0.01	Fail	0.0127686116084135
S19-A41	2_1	Unknown	1	sall4	Test	2.5	24700.6199935336	0.08	Fail	0.00681715441030155
S19-A42	2_1	Unknown	1	xpc	Test	2.5	17146.8192437976	0.111864763722987	Fail	0.00548824355156608
S19-A43	2_1	Unknown	1	Cyp26a1	Test	3.57464285046447	40824.6187881383	0.394900645898171	Fail	0.00883074677869744
S19-A44	2_1	Unknown	1	Fgf8a
S19-A45	2_1	Unknown	1	Igf1ra	Test	9.41867414825592	73.176683352721	1	Pass	0.00648470647509694
S19-A46	2_1	Unknown	1	nanog	Test	14.1381553949776	0.000981562921271838	0.348296730957044	Fail	0.0080293555926136
S19-A47	2_1	Unknown	1	spop	Test	999	-1	0	Fail	0.00683061453397148
S19-A48	2_1	Unknown	1	yap1	Test	7.59020410192162	379.362427659767	0.967636110910631	Pass	0.00384749366749803
S25-A01	2_2	Unknown	1	actb1	Test	6.6464448106324	61.2930149275524	0.892850959492862	Pass	0.00515123486432751
S25-A02	2_2	Unknown	1	dnmt1	Test	10.5645552784701	44.5346446685883	1	Pass	0.00838036413701631
S25-A03	2_2	Unknown	1	Fgfr4	Test	10.653600438129	63.4003820855145	1	Pass	0.00765676153628628
S25-A04	2_2	Unknown	1	jmjd6	Test	10.9687150012001	36.4866712115473	1	Pass	0.0067923511426121
S25-A05	2_2	Unknown	1	neil1	Test	10.6687567879674	36.0132518936547	1	Pass	0.0078521262809567
S25-A06	2_2	Unknown	1	tdg.1	Test	10.971917529446	57.8372424863717	0.914386659809081	Pass	0.00651112676535075
S25-A07	2_2	Unknown	1	Fgf4	Test	13.3573113805018	162.784242247901	0.9610041775749	Pass	0.00585753619118968
S25-A08	2_2	Unknown	1	dnmt3aa	Test	10.1558063160558	61.0588161133406	0.98268568430258	Pass	0.00720457938855895
S25-A09	2_2	Unknown	1	foxo3a	Test	7.90158708849191	83.1089473145025	1	Pass	0.00894309864058025
S25-A10	2_2	Unknown	1	kdm2aa	Test	9.48589799478677	59.6038536255247	1	Pass	0.00799264174920814
S25-A11	2_2	Unknown	1	ogt.1	Test	10.1572125777461	42.2662054780661	0.960151204323648	Pass	0.00580787823573391
S25-A12	2_2	Unknown	1	tert	Test	14.526561735249	95.7133996723963	0.968345113305483	Pass	0.00846945269463405
S25-A13	2_2	Unknown	1	Aldh1a2	Test	11.3183919913806	51.8765443947776	0.938360064086361	Pass	0.00632939983004382
S25-A14	2_2	Unknown	1	dnmt3ab	Test	8.87558771535125	78.7382052473263	1	Pass	0.00931843179675896
S25-A15	2_2	Unknown	1	gadd45aa	Test	10.8975427797734	83.9089447569324	1	Pass	0.00880831281487657
S25-A16	2_2	Unknown	1	kdm4b/jmjd2b	Test	9.3411205453333	79.1284305410366	1	Pass	0.00927896985905001
S25-A17	2_2	Unknown	1	pou5f3	Test	16.550990020904	-1	0.868299504062533	Pass	0.00450652254380955
S25-A18	2_2	Unknown	1	tet3	Test	9.29538625755217	71.9472521227935	0.984533212139732	Pass	0.00750583387196605
S25-A19	2_2	Unknown	1	Axin2	Test	9.67922428817522	55.780843888729	1	Pass	0.00461906985014386
S25-A20	2_2	Unknown	1	dnmt3ba	Test	11.5321642091796	60.5315908578758	0.99076011336243	Pass	0.00597259676966606
S25-A21	2_2	Unknown	1	gadd45ab	Test	9.18786051770809	92.9786365946361	0.983789772144602	Pass	0.00665105353454544
S25-A22	2_2	Unknown	1	lats1	Test	10.1382772031456	63.2676733368253	0.966003760748684	Pass	0.00662357811419632
S25-A23	2_2	Unknown	1	Rarab	Test	9.82341006664088	67.5990944216665	1	Pass	0.00787731352009684
S25-A24	2_2	Unknown	1	ved	Test	12.521527386576	83.3725589962834	0.892349496589336	Pass	0.00621567465591404
S25-A25	2_2	Unknown	1	cdkn2c	Test	13.0743080669158	164.244322002357	0.935616749036389	Pass	0.00783619584131053
S25-A26	2_2	Unknown	1	dnmt3bb.1	Test	12.9946673524665	39.425218875666	1	Pass	0.00423247310552466
S25-A27	2_2	Unknown	1	hdac1	Test	9.39883065000249	57.6703451520853	0.897876083534008	Pass	0.00482340564875717
S25-A28	2_2	Unknown	1	lin28a	Test	14.3581394903113	72.5349900569392	0.988617196385639	Pass	0.00685732601660462
S25-A29	2_2	Unknown	1	Rpl13a1	Test	4.70695537701	59.5053243847493	0.890769544034954	Pass	0.0103523231385501
S25-A30	2_2	Unknown	1	vent
S25-A31	2_2	Unknown	1	Crabp1b	Test	12.9458953385746	51.1450359392493	1	Pass	0.00704322330326988
S25-A32	2_2	Unknown	1	Dusp6	Test	7.22182435283337	77.8740028159325	0.987283926161751	Pass	0.0114011679183338
S25-A33	2_2	Unknown	1	Ifg1rb	Test	9.69917379139611	68.6512074785352	1	Pass	0.00843121681178218
S25-A34	2_2	Unknown	1	mycb	Test	8.6514340505599	125.286270810355	1	Pass	0.00834510025919904
S25-A35	2_2	Unknown	1	Rpl13a2	Test	4.58612471391768	52.8253511281391	0.802443074733066	Pass	0.00967061280246088
S25-A36	2_2	Unknown	1	vox	Test	15.4157236913619	45.6901869569783	1	Pass	0.00881965691216683
S25-A37	2_2	Unknown	1	Crabp2a	Test	11.4592821634347	43.3942092308121	1	Pass	0.00685417042127909
S25-A38	2_2	Unknown	1	ezh2	Test	12.7806430658515	41.9847748759479	1	Pass	0.00764759834232412
S25-A39	2_2	Unknown	1	Igf1	Test	13.190970829309	96.9520298606912	0.994725546035621	Pass	0.0083332072578722
S25-A40	2_2	Unknown	1	mycla	Test	12.3834378589514	51.6893402272521	0.985392741487264	Pass	0.0127686116084135
S25-A41	2_2	Unknown	1	sall4	Test	12.6048798685338	68.71919368051	0.940623966129418	Pass	0.00681715441030155
S25-A42	2_2	Unknown	1	xpc	Test	12.1859674931974	19.1865042623336	0.91566763342302	Pass	0.00548824355156608
S25-A43	2_2	Unknown	1	Cyp26a1	Test	12.2478452114376	74.4519605871211	1	Pass	0.00883074677869744
S25-A44	2_2	Unknown	1	Fgf8a
S25-A45	2_2	Unknown	1	Igf1ra	Test	9.35081332855234	76.9583505636554	0.961361657134504	Pass	0.00648470647509694
S25-A46	2_2	Unknown	1	nanog	Test	18.8929234854233	3505.6033274246	0.941842820961487	Pass	0.0080293555926136
S25-A47	2_2	Unknown	1	spop	Test	9.56586659299132	75.648170021272	0.953309761831666	Pass	0.00683061453397148
S25-A48	2_2	Unknown	1	yap1	Test	9.12376834357532	125.245604527524	0.883129103555866	Pass	0.00384749366749803
S31-A01	2_3	Unknown	1	actb1	Test	5.62908044153422	125.704757163378	0.941081433481721	Pass	0.00515123486432751
S31-A02	2_3	Unknown	1	dnmt1	Test	9.711703228756	71.7216775668438	1	Pass	0.00838036413701631
S31-A03	2_3	Unknown	1	Fgfr4	Test	10.0023609356576	92.1807009853751	0.953342075839319	Pass	0.00765676153628628
S31-A04	2_3	Unknown	1	jmjd6	Test	10.6246459262184	44.3362302227847	1	Pass	0.0067923511426121
S31-A05	2_3	Unknown	1	neil1	Test	10.4075531132572	43.557789907058	1	Pass	0.0078521262809567
S31-A06	2_3	Unknown	1	tdg.1	Test	9.98913133291635	125.370233799092	0.928797927291988	Pass	0.00651112676535075
S31-A07	2_3	Unknown	1	Fgf4	Test	12.8023458519652	284.902563274989	1	Pass	0.00585753619118968
S31-A08	2_3	Unknown	1	dnmt3aa	Test	9.53201856548476	88.0444780431038	1	Pass	0.00720457938855895
S31-A09	2_3	Unknown	1	foxo3a	Test	7.83588559640493	87.1294292065931	1	Pass	0.00894309864058025
S31-A10	2_3	Unknown	1	kdm2aa	Test	9.38694891330343	63.8983659163202	1	Pass	0.00799264174920814
S31-A11	2_3	Unknown	1	ogt.1	Test	9.34236565124593	70.6139529536385	1	Pass	0.00580787823573391
S31-A12	2_3	Unknown	1	tert	Test	13.3180483225355	267.460549402133	0.9943271504904	Pass	0.00846945269463405
S31-A13	2_3	Unknown	1	Aldh1a2	Test	10.3550896214984	104.890861005364	0.981268905317381	Pass	0.00632939983004382
S31-A14	2_3	Unknown	1	dnmt3ab	Test	8.5166159936822	102.413349887534	1	Pass	0.00931843179675896
S31-A15	2_3	Unknown	1	gadd45aa	Test	10.595348549296	106.499194242257	1	Pass	0.00880831281487657
S31-A16	2_3	Unknown	1	kdm4b/jmjd2b	Test	9.5063178100073	71.1761915907861	1	Pass	0.00927896985905001
S31-A17	2_3	Unknown	1	pou5f3	Test	17.6897393424084	-1	0.916752711965674	Pass	0.00450652254380955
S31-A18	2_3	Unknown	1	tet3	Test	8.67526722829174	110.45293027255	1	Pass	0.00750583387196605
S31-A19	2_3	Unknown	1	Axin2	Test	9.78247539212626	52.8022369278048	1	Pass	0.00461906985014386
S31-A20	2_3	Unknown	1	dnmt3ba	Test	11.350904478458	68.3256580923578	0.998367004249485	Pass	0.00597259676966606
S31-A21	2_3	Unknown	1	gadd45ab	Test	9.35210615469237	81.3610262017084	1	Pass	0.00665105353454544
S31-A22	2_3	Unknown	1	lats1	Test	9.84320871873007	76.6176324227722	1	Pass	0.00662357811419632
S31-A23	2_3	Unknown	1	Rarab	Test	9.18307268506135	108.232224533159	0.989928452517012	Pass	0.00787731352009684
S31-A24	2_3	Unknown	1	ved	Test	12.7544252987707	70.907331224855	0.945501811974594	Pass	0.00621567465591404
S31-A25	2_3	Unknown	1	cdkn2c	Test	12.8229244343158	200.405695914783	1	Pass	0.00783619584131053
S31-A26	2_3	Unknown	1	dnmt3bb.1	Test	11.8712416508152	94.376222789034	0.982252051027532	Pass	0.00423247310552466
S31-A27	2_3	Unknown	1	hdac1	Test	8.74108252286918	88.3161119636401	1	Pass	0.00482340564875717
S31-A28	2_3	Unknown	1	lin28a	Test	13.7897615180419	118.254825175934	1	Pass	0.00685732601660462
S31-A29	2_3	Unknown	1	Rpl13a1	Test	4.13176010093765	92.1208623772347	0.641959532910225	Fail	0.0103523231385501
S31-A30	2_3	Unknown	1	vent
S31-A31	2_3	Unknown	1	Crabp1b	Test	12.5219101566656	66.0389991806209	1	Pass	0.00704322330326988
S31-A32	2_3	Unknown	1	Dusp6	Test	7.0035586711816	91.1517000894315	0.9821446616499	Pass	0.0114011679183338
S31-A33	2_3	Unknown	1	Ifg1rb	Test	9.30216200671808	90.9850961075778	1	Pass	0.00843121681178218
S31-A34	2_3	Unknown	1	mycb	Test	9.23315312993453	81.5837062953968	1	Pass	0.00834510025919904
S31-A35	2_3	Unknown	1	Rpl13a2	Test	4.04612450964821	80.1615087082343	0.577077631257952	Fail	0.00967061280246088
S31-A36	2_3	Unknown	1	vox	Test	15.6009370274903	39.3420161720006	1	Pass	0.00881965691216683
S31-A37	2_3	Unknown	1	Crabp2a	Test	10.2218172542014	94.6436160908008	1	Pass	0.00685417042127909
S31-A38	2_3	Unknown	1	ezh2	Test	11.6164773112515	91.7238865120724	1	Pass	0.00764759834232412
S31-A39	2_3	Unknown	1	Igf1	Test	13.5573978193783	75.5492264014891	1	Pass	0.0083332072578722
S31-A40	2_3	Unknown	1	mycla	Test	12.1850925386373	58.87449678797	0.984406135031194	Pass	0.0127686116084135
S31-A41	2_3	Unknown	1	sall4	Test	12.601972992649	68.8356209367846	0.971127760578694	Pass	0.00681715441030155
S31-A42	2_3	Unknown	1	xpc	Test	11.5276327970548	30.4496169042075	0.98082952783344	Pass	0.00548824355156608
S31-A43	2_3	Unknown	1	Cyp26a1	Test	11.954622051668	92.146248529512	1	Pass	0.00883074677869744
S31-A44	2_3	Unknown	1	Fgf8a
S31-A45	2_3	Unknown	1	Igf1ra	Test	9.18250052785101	87.2030063430865	0.953058435279221	Pass	0.00648470647509694
S31-A46	2_3	Unknown	1	nanog	Test	20.2391760367288	251256.897537892	0.971188552449768	Pass	0.0080293555926136
S31-A47	2_3	Unknown	1	spop	Test	9.13252437394826	104.176576554978	0.90921115887967	Pass	0.00683061453397148
S31-A48	2_3	Unknown	1	yap1	Test	8.8078359840984	157.367228886251	1	Pass	0.00384749366749803
S37-A01	3_1	Unknown	1	actb1	Test	5.91668653639803	102.604623613157	0.973631488092867	Pass	0.00515123486432751
S37-A02	3_1	Unknown	1	dnmt1	Test	9.64879058170049	74.287676574226	1	Pass	0.00838036413701631
S37-A03	3_1	Unknown	1	Fgfr4	Test	9.91095619690193	97.1526058685086	1	Pass	0.00765676153628628
S37-A04	3_1	Unknown	1	jmjd6	Test	10.0726147471242	60.608286449458	0.99735048484006	Pass	0.0067923511426121
S37-A05	3_1	Unknown	1	neil1	Test	9.00047898715378	121.350442884105	0.974999437716002	Pass	0.0078521262809567
S37-A06	3_1	Unknown	1	tdg.1	Test	10.4985869052346	83.9510161678889	0.926896019648662	Pass	0.00651112676535075
S37-A07	3_1	Unknown	1	Fgf4	Test	12.8378582124002	274.87887258029	0.997829041409684	Pass	0.00585753619118968
S37-A08	3_1	Unknown	1	dnmt3aa	Test	9.68002869162694	80.7209282489785	1	Pass	0.00720457938855895
S37-A09	3_1	Unknown	1	foxo3a	Test	7.87685848080512	84.5999225367436	1	Pass	0.00894309864058025
S37-A10	3_1	Unknown	1	kdm2aa	Test	9.0623739292942	80.2791974184177	1	Pass	0.00799264174920814
S37-A11	3_1	Unknown	1	ogt.1	Test	8.80350297188567	99.1502217725772	1	Pass	0.00580787823573391
S37-A12	3_1	Unknown	1	tert	Test	13.6145022743807	207.866001178021	1	Pass	0.00846945269463405
S37-A13	3_1	Unknown	1	Aldh1a2	Test	10.47914742644	95.7987502652629	0.96564290210688	Pass	0.00632939983004382
S37-A14	3_1	Unknown	1	dnmt3ab	Test	8.72958416706111	87.6237796134334	1	Pass	0.00931843179675896
S37-A15	3_1	Unknown	1	gadd45aa	Test	10.6089084746986	105.365979305067	1	Pass	0.00880831281487657
S37-A16	3_1	Unknown	1	kdm4b/jmjd2b	Test	9.48485054222414	72.1625927784934	1	Pass	0.00927896985905001
S37-A17	3_1	Unknown	1	pou5f3	Test	17.3092460115482	-1	0.879916709350591	Pass	0.00450652254380955
S37-A18	3_1	Unknown	1	tet3	Test	8.92594567376507	92.8800070224256	1	Pass	0.00750583387196605
S37-A19	3_1	Unknown	1	Axin2	Test	8.94575716180085	82.3732820684832	1	Pass	0.00461906985014386
S37-A20	3_1	Unknown	1	dnmt3ba	Test	11.0642543361761	82.7503711211714	0.941185944964276	Pass	0.00597259676966606
S37-A21	3_1	Unknown	1	gadd45ab	Test	9.43628253577177	75.9815732386263	1	Pass	0.00665105353454544
S37-A22	3_1	Unknown	1	lats1	Test	9.86011832832886	75.7816045478957	1	Pass	0.00662357811419632
S37-A23	3_1	Unknown	1	Rarab	Test	9.38314286960086	93.4303398113497	1	Pass	0.00787731352009684
S37-A24	3_1	Unknown	1	ved	Test	12.0250019421441	117.751660814988	0.852935267838481	Pass	0.00621567465591404
S37-A25	3_1	Unknown	1	cdkn2c	Test	13.4705025323564	120.02954471434	1	Pass	0.00783619584131053
S37-A26	3_1	Unknown	1	dnmt3bb.1	Test	11.6810915046508	109.402389533514	1	Pass	0.00423247310552466
S37-A27	3_1	Unknown	1	hdac1	Test	9.09918488098292	70.0279695489995	0.91217730188967	Pass	0.00482340564875717
S37-A28	3_1	Unknown	1	lin28a	Test	13.9736499888622	100.958363966075	1	Pass	0.00685732601660462
S37-A29	3_1	Unknown	1	Rpl13a1	Test	4.05528266087309	97.6323894372559	0.599038485004662	Fail	0.0103523231385501
S37-A30	3_1	Unknown	1	vent
S37-A31	3_1	Unknown	1	Crabp1b	Test	12.031794609725	88.7380834197504	0.92637495794827	Pass	0.00704322330326988
S37-A32	3_1	Unknown	1	Dusp6	Test	7.06447682769502	87.2332407885557	0.981121421368886	Pass	0.0114011679183338
S37-A33	3_1	Unknown	1	Ifg1rb	Test	9.42176291039597	83.5834690577684	1	Pass	0.00843121681178218
S37-A34	3_1	Unknown	1	mycb	Test	9.28414947688192	78.5726598412148	1	Pass	0.00834510025919904
S37-A35	3_1	Unknown	1	Rpl13a2	Test	4.01320381678555	82.2257673708046	0.548800595697759	Fail	0.00967061280246088
S37-A36	3_1	Unknown	1	vox	Test	15.2824364447406	50.8833167322831	1	Pass	0.00881965691216683
S37-A37	3_1	Unknown	1	Crabp2a	Test	10.5377009141716	77.5608927832074	1	Pass	0.00685417042127909
S37-A38	3_1	Unknown	1	ezh2	Test	11.5954072961409	93.0304270888272	1	Pass	0.00764759834232412
S37-A39	3_1	Unknown	1	Igf1	Test	13.5017155402597	78.467783474499	1	Pass	0.0083332072578722
S37-A40	3_1	Unknown	1	mycla	Test	11.6894260531853	81.5054531590297	1	Pass	0.0127686116084135
S37-A41	3_1	Unknown	1	sall4	Test	12.2411357345829	84.9322737118294	0.9198571899493	Pass	0.00681715441030155
S37-A42	3_1	Unknown	1	xpc	Test	9.89984883197528	95.3995518723891	1	Pass	0.00548824355156608
S37-A43	3_1	Unknown	1	Cyp26a1	Test	12.0792432147332	84.163075258028	1	Pass	0.00883074677869744
S37-A44	3_1	Unknown	1	Fgf8a
S37-A45	3_1	Unknown	1	Igf1ra	Test	9.30896270416922	79.3873474880147	0.973784867291135	Pass	0.00648470647509694
S37-A46	3_1	Unknown	1	nanog	Test	19.018378462456	5219.87566106552	0.927757067078223	Pass	0.0080293555926136
S37-A47	3_1	Unknown	1	spop	Test	9.39051067744612	86.1062320643991	0.943867937771599	Pass	0.00683061453397148
S37-A48	3_1	Unknown	1	yap1	Test	9.2191402670595	116.90446316724	0.855924230072027	Pass	0.00384749366749803
S43-A01	3_2	Unknown	1	actb1	Test	5.08272030380714	184.873541633771	0.846972970747706	Pass	0.00515123486432751
S43-A02	3_2	Unknown	1	dnmt1	Test	9.0117201649635	106.049301335597	1	Pass	0.00838036413701631
S43-A03	3_2	Unknown	1	Fgfr4	Test	9.48666152033801	123.981701347452	1	Pass	0.00765676153628628
S43-A04	3_2	Unknown	1	jmjd6	Test	9.87526355342167	67.7752223723068	1	Pass	0.0067923511426121
S43-A05	3_2	Unknown	1	neil1	Test	9.74655945292991	70.4854703710793	1	Pass	0.0078521262809567
S43-A06	3_2	Unknown	1	tdg.1	Test	9.40290149065032	198.888590411631	0.906977153923944	Pass	0.00651112676535075
S43-A07	3_2	Unknown	1	Fgf4	Test	11.8344531496097	756.221845105613	1	Pass	0.00585753619118968
S43-A08	3_2	Unknown	1	dnmt3aa	Test	8.91872531771445	126.177423558848	1	Pass	0.00720457938855895
S43-A09	3_2	Unknown	1	foxo3a	Test	6.96975520266702	162.419350220373	1	Pass	0.00894309864058025
S43-A10	3_2	Unknown	1	kdm2aa	Test	8.50873622008462	118.485069841349	1	Pass	0.00799264174920814
S43-A11	3_2	Unknown	1	ogt.1	Test	8.79245009131914	99.842891437423	1	Pass	0.00580787823573391
S43-A12	3_2	Unknown	1	tert	Test	13.3996703947988	249.527175202552	1	Pass	0.00846945269463405
S43-A13	3_2	Unknown	1	Aldh1a2	Test	9.99537468344773	136.432099860167	1	Pass	0.00632939983004382
S43-A14	3_2	Unknown	1	dnmt3ab	Test	7.89392161958535	161.586360410504	1	Pass	0.00931843179675896
S43-A15	3_2	Unknown	1	gadd45aa	Test	9.616717735506	230.48661139798	1	Pass	0.00880831281487657
S43-A16	3_2	Unknown	1	kdm4b/jmjd2b	Test	8.52206012258588	133.780593665921	1	Pass	0.00927896985905001
S43-A17	3_2	Unknown	1	pou5f3	Test	15.7902365825784	-1	0.971181614113737	Pass	0.00450652254380955
S43-A18	3_2	Unknown	1	tet3	Test	8.01844638789452	173.923533976719	0.991538765925017	Pass	0.00750583387196605
S43-A19	3_2	Unknown	1	Axin2	Test	8.3771465158497	111.438420092999	0.98574057873477	Pass	0.00461906985014386
S43-A20	3_2	Unknown	1	dnmt3ba	Test	10.5056836220137	120.189815733044	1	Pass	0.00597259676966606
S43-A21	3_2	Unknown	1	gadd45ab	Test	8.62089290585237	147.394567133313	1	Pass	0.00665105353454544
S43-A22	3_2	Unknown	1	lats1	Test	9.25800463529875	112.003714526864	1	Pass	0.00662357811419632
S43-A23	3_2	Unknown	1	Rarab	Test	8.58174083073777	168.391632762654	1	Pass	0.00787731352009684
S43-A24	3_2	Unknown	1	ved	Test	11.9239386532553	126.324263718086	0.996675366005796	Pass	0.00621567465591404
S43-A25	3_2	Unknown	1	cdkn2c	Test	12.2140638593554	324.505305810887	1	Pass	0.00783619584131053
S43-A26	3_2	Unknown	1	dnmt3bb.1	Test	11.4403143394948	131.909049893465	1	Pass	0.00423247310552466
S43-A27	3_2	Unknown	1	hdac1	Test	7.93520155732244	148.871393132309	1	Pass	0.00482340564875717
S43-A28	3_2	Unknown	1	lin28a	Test	12.7503951822104	289.06102644288	1	Pass	0.00685732601660462
S43-A29	3_2	Unknown	1	Rpl13a1	Test	3.98859678155535	102.706714220215	0.662865593851782	Pass	0.0103523231385501
S43-A30	3_2	Unknown	1	vent
S43-A31	3_2	Unknown	1	Crabp1b	Test	11.7177879034273	107.229746109478	1	Pass	0.00704322330326988
S43-A32	3_2	Unknown	1	Dusp6	Test	6.21310114661156	161.204657117413	1	Pass	0.0114011679183338
S43-A33	3_2	Unknown	1	Ifg1rb	Test	8.49852822652816	160.907166210733	1	Pass	0.00843121681178218
S43-A34	3_2	Unknown	1	mycb	Test	7.81420165984182	232.29168029887	1	Pass	0.00834510025919904
S43-A35	3_2	Unknown	1	Rpl13a2	Test	3.82412987174793	95.1537557910781	0.608043290582642	Fail	0.00967061280246088
S43-A36	3_2	Unknown	1	vox	Test	14.7853715839151	76.020072381204	1	Pass	0.00881965691216683
S43-A37	3_2	Unknown	1	Crabp2a	Test	9.61151971181014	139.031336893684	1	Pass	0.00685417042127909
S43-A38	3_2	Unknown	1	ezh2	Test	10.881727107007	150.205226481374	1	Pass	0.00764759834232412
S43-A39	3_2	Unknown	1	Igf1	Test	12.2716465198277	181.274591948534	1	Pass	0.0083332072578722
S43-A40	3_2	Unknown	1	mycla	Test	11.3849886849147	99.5286112571229	1	Pass	0.0127686116084135
S43-A41	3_2	Unknown	1	sall4	Test	11.7153883921301	115.355884109063	1	Pass	0.00681715441030155
S43-A42	3_2	Unknown	1	xpc	Test	10.9172075668208	46.7272716036095	1	Pass	0.00548824355156608
S43-A43	3_2	Unknown	1	Cyp26a1	Test	11.5013538551788	128.121584224902	1	Pass	0.00883074677869744
S43-A44	3_2	Unknown	1	Fgf8a
S43-A45	3_2	Unknown	1	Igf1ra	Test	8.48431776699013	146.444796718169	1	Pass	0.00648470647509694
S43-A46	3_2	Unknown	1	nanog	Test	17.7940509089199	107.235217532719	1	Pass	0.0080293555926136
S43-A47	3_2	Unknown	1	spop	Test	8.70363487250407	142.992665639403	1	Pass	0.00683061453397148
S43-A48	3_2	Unknown	1	yap1	Test	8.29421601986877	228.090986759264	0.926308406307799	Pass	0.00384749366749803
S02-A01	3_3	Unknown	1	actb1	Test	5.68361181644423	120.957135306425	0.950352174795759	Pass	0.00515123486432751
S02-A02	3_3	Unknown	1	dnmt1	Test	9.31799408020334	89.3691464200319	1	Pass	0.00838036413701631
S02-A03	3_3	Unknown	1	Fgfr4	Test	9.5684770475112	118.286884418315	1	Pass	0.00765676153628628
S02-A04	3_3	Unknown	1	jmjd6	Test	9.88315286955138	67.4730834029325	1	Pass	0.0067923511426121
S02-A05	3_3	Unknown	1	neil1	Test	9.60205691364252	78.306413363102	1	Pass	0.0078521262809567
S02-A06	3_3	Unknown	1	tdg.1	Test	9.54075512673872	178.435640109784	0.930618969544266	Pass	0.00651112676535075
S02-A07	3_3	Unknown	1	Fgf4	Test	12.2588081369826	492.918117730439	0.961902271211848	Pass	0.00585753619118968
S02-A08	3_3	Unknown	1	dnmt3aa	Test	9.12266161422705	111.947541234567	1	Pass	0.00720457938855895
S02-A09	3_3	Unknown	1	foxo3a	Test	6.91768712837721	168.615482143605	1	Pass	0.00894309864058025
S02-A10	3_3	Unknown	1	kdm2aa	Test	8.73634863378504	100.962283329475	1	Pass	0.00799264174920814
S02-A11	3_3	Unknown	1	ogt.1	Test	9.03866977167947	85.499780316544	0.978585470115038	Pass	0.00580787823573391
S02-A12	3_3	Unknown	1	tert	Test	13.5167573187246	225.88078974019	1	Pass	0.00846945269463405
S02-A13	3_3	Unknown	1	Aldh1a2	Test	10.0500336285634	131.089224736462	0.957125362375234	Pass	0.00632939983004382
S02-A14	3_3	Unknown	1	dnmt3ab	Test	7.84190413237106	167.860640506397	1	Pass	0.00931843179675896
S02-A15	3_3	Unknown	1	gadd45aa	Test	9.96373441807531	175.287332098612	1	Pass	0.00880831281487657
S02-A16	3_3	Unknown	1	kdm4b/jmjd2b	Test	8.51416773741486	134.459251060991	1	Pass	0.00927896985905001
S02-A17	3_3	Unknown	1	pou5f3	Test	18.7871974058412	-1	0.964068915909351	Pass	0.00450652254380955
S02-A18	3_3	Unknown	1	tet3	Test	8.04639250441211	170.595974297195	1	Pass	0.00750583387196605
S02-A19	3_3	Unknown	1	Axin2	Test	8.92403306286421	83.3298880031469	1	Pass	0.00461906985014386
S02-A20	3_3	Unknown	1	dnmt3ba	Test	10.315329588106	136.492434401687	0.995535424903756	Pass	0.00597259676966606
S02-A21	3_3	Unknown	1	gadd45ab	Test	8.55978212143536	154.899185880059	1	Pass	0.00665105353454544
S02-A22	3_3	Unknown	1	lats1	Test	9.43629718949385	99.7680903967188	1	Pass	0.00662357811419632
S02-A23	3_3	Unknown	1	Rarab	Test	8.64298127196292	160.979526261464	1	Pass	0.00787731352009684
S02-A24	3_3	Unknown	1	ved	Test	12.2833854467851	98.3872333345314	0.948659541573416	Pass	0.00621567465591404
S02-A25	3_3	Unknown	1	cdkn2c	Test	12.2689206479345	310.71580642148	1	Pass	0.00783619584131053
S02-A26	3_3	Unknown	1	dnmt3bb.1	Test	11.973864318492	87.1432243719739	1	Pass	0.00423247310552466
S02-A27	3_3	Unknown	1	hdac1	Test	8.03295651955882	139.734434570437	0.922910323998489	Pass	0.00482340564875717
S02-A28	3_3	Unknown	1	lin28a	Test	12.8147779721397	273.491977434289	1	Pass	0.00685732601660462
S02-A29	3_3	Unknown	1	Rpl13a1	Test	3.80278104794069	118.280748131831	0.600927015980231	Fail	0.0103523231385501
S02-A30	3_3	Unknown	1	vent
S02-A31	3_3	Unknown	1	Crabp1b	Test	11.6199054903961	113.747106133989	1	Pass	0.00704322330326988
S02-A32	3_3	Unknown	1	Dusp6	Test	6.17724744996347	165.42793363385	1	Pass	0.0114011679183338
S02-A33	3_3	Unknown	1	Ifg1rb	Test	8.4816871608791	162.841177937186	1	Pass	0.00843121681178218
S02-A34	3_3	Unknown	1	mycb	Test	8.74195007020958	117.196603231464	1	Pass	0.00834510025919904
S02-A35	3_3	Unknown	1	Rpl13a2	Test	3.60670115447107	112.552336452679	0.535567051490358	Fail	0.00967061280246088
S02-A36	3_3	Unknown	1	vox	Test	14.4504764010699	99.6317428309874	1	Pass	0.00881965691216683
S02-A37	3_3	Unknown	1	Crabp2a	Test	9.79414372767363	123.917776414395	1	Pass	0.00685417042127909
S02-A38	3_3	Unknown	1	ezh2	Test	10.9849835067023	140.146605815815	1	Pass	0.00764759834232412
S02-A39	3_3	Unknown	1	Igf1	Test	12.2640131694193	182.218969021543	1	Pass	0.0083332072578722
S02-A40	3_3	Unknown	1	mycla	Test	11.3631165946991	100.967417396347	1	Pass	0.0127686116084135
S02-A41	3_3	Unknown	1	sall4	Test	11.5183066926036	129.384953779096	0.973148077745895	Pass	0.00681715441030155
S02-A42	3_3	Unknown	1	xpc	Test	10.8064987140859	50.5012309512369	1	Pass	0.00548824355156608
S02-A43	3_3	Unknown	1	Cyp26a1	Test	11.176274696755	162.287146233514	1	Pass	0.00883074677869744
S02-A44	3_3	Unknown	1	Fgf8a
S02-A45	3_3	Unknown	1	Igf1ra	Test	8.30671112942483	167.088526436288	1	Pass	0.00648470647509694
S02-A46	3_3	Unknown	1	nanog	Test	17.6579996535325	69.636455040185	1	Pass	0.0080293555926136
S02-A47	3_3	Unknown	1	spop	Test	8.3893269011503	180.348054670063	0.977506495279548	Pass	0.00683061453397148
S02-A48	3_3	Unknown	1	yap1	Test	8.54737227286321	189.958132924221	0.997443165669792	Pass	0.00384749366749803
S08-A01	4_1	Unknown	1	actb1	Test	5.85302004549575	107.321844935039	0.978346688749401	Pass	0.00515123486432751
S08-A02	4_1	Unknown	1	dnmt1	Test	9.53371537069931	79.221095031142	1	Pass	0.00838036413701631
S08-A03	4_1	Unknown	1	Fgfr4	Test	9.87354671802694	99.2640037319271	1	Pass	0.00765676153628628
S08-A04	4_1	Unknown	1	jmjd6	Test	9.8369736328956	69.2609491057335	1	Pass	0.0067923511426121
S08-A05	4_1	Unknown	1	neil1	Test	9.25848971665237	100.565174378732	1	Pass	0.0078521262809567
S08-A06	4_1	Unknown	1	tdg.1	Test	10.0538747643172	119.140792402327	0.901408094367714	Pass	0.00651112676535075
S08-A07	4_1	Unknown	1	Fgf4	Test	12.9116132463699	255.173427761394	1	Pass	0.00585753619118968
S08-A08	4_1	Unknown	1	dnmt3aa	Test	9.73389115135037	78.2097508821619	1	Pass	0.00720457938855895
S08-A09	4_1	Unknown	1	foxo3a	Test	7.69616736862962	96.3375741250828	1	Pass	0.00894309864058025
S08-A10	4_1	Unknown	1	kdm2aa	Test	8.79822793618017	96.6637188594439	1	Pass	0.00799264174920814
S08-A11	4_1	Unknown	1	ogt.1	Test	8.3102641577657	135.274730675331	1	Pass	0.00580787823573391
S08-A12	4_1	Unknown	1	tert	Test	13.7818602986295	180.293678262694	1	Pass	0.00846945269463405
S08-A13	4_1	Unknown	1	Aldh1a2	Test	10.1693085558729	120.145454676894	0.973466287606281	Pass	0.00632939983004382
S08-A14	4_1	Unknown	1	dnmt3ab	Test	8.53859111271409	100.778381407376	1	Pass	0.00931843179675896
S08-A15	4_1	Unknown	1	gadd45aa	Test	10.1967856309802	145.848615943219	1	Pass	0.00880831281487657
S08-A16	4_1	Unknown	1	kdm4b/jmjd2b	Test	9.13122290973005	90.5267239164032	1	Pass	0.00927896985905001
S08-A17	4_1	Unknown	1	pou5f3	Test	17.0502207961184	-1	0.866819954818814	Pass	0.00450652254380955
S08-A18	4_1	Unknown	1	tet3	Test	8.71766807501292	107.262590732301	1	Pass	0.00750583387196605
S08-A19	4_1	Unknown	1	Axin2	Test	8.93208598322471	82.9739941924878	1	Pass	0.00461906985014386
S08-A20	4_1	Unknown	1	dnmt3ba	Test	10.7900529522563	99.3901706385475	1	Pass	0.00597259676966606
S08-A21	4_1	Unknown	1	gadd45ab	Test	9.06881812746064	102.422759676257	1	Pass	0.00665105353454544
S08-A22	4_1	Unknown	1	lats1	Test	9.51202762064316	94.9842736056245	1	Pass	0.00662357811419632
S08-A23	4_1	Unknown	1	Rarab	Test	9.1997373639941	106.914521932207	1	Pass	0.00787731352009684
S08-A24	4_1	Unknown	1	ved	Test	11.6574785472956	152.038680567149	0.961530757266907	Pass	0.00621567465591404
S08-A25	4_1	Unknown	1	cdkn2c	Test	12.729422800203	215.801118930549	1	Pass	0.00783619584131053
S08-A26	4_1	Unknown	1	dnmt3bb.1	Test	11.1931279767232	159.8398615263	0.973552297296504	Pass	0.00423247310552466
S08-A27	4_1	Unknown	1	hdac1	Test	8.64098702528938	94.2337270260549	1	Pass	0.00482340564875717
S08-A28	4_1	Unknown	1	lin28a	Test	13.9079062163752	106.830568029706	1	Pass	0.00685732601660462
S08-A29	4_1	Unknown	1	Rpl13a1	Test	3.86713885456423	112.636036494269	0.622379618188076	Fail	0.0103523231385501
S08-A30	4_1	Unknown	1	vent
S08-A31	4_1	Unknown	1	Crabp1b	Test	11.9102418493464	95.4842828021256	1	Pass	0.00704322330326988
S08-A32	4_1	Unknown	1	Dusp6	Test	6.86744011896053	100.555134813125	1	Pass	0.0114011679183338
S08-A33	4_1	Unknown	1	Ifg1rb	Test	9.24733141449371	94.5940767983537	1	Pass	0.00843121681178218
S08-A34	4_1	Unknown	1	mycb	Test	8.94929614983007	100.579815065383	1	Pass	0.00834510025919904
S08-A35	4_1	Unknown	1	Rpl13a2	Test	3.75102675588227	100.680583679801	0.583675585294091	Fail	0.00967061280246088
S08-A36	4_1	Unknown	1	vox	Test	15.3898250819565	46.6559735609543	1	Pass	0.00881965691216683
S08-A37	4_1	Unknown	1	Crabp2a	Test	10.1813696349728	97.0869164271874	1	Pass	0.00685417042127909
S08-A38	4_1	Unknown	1	ezh2	Test	11.4822650232288	100.371292204082	1	Pass	0.00764759834232412
S08-A39	4_1	Unknown	1	Igf1	Test	13.1456842957913	99.9873304164105	1	Pass	0.0083332072578722
S08-A40	4_1	Unknown	1	mycla	Test	11.3511116744494	101.765956071078	1	Pass	0.0127686116084135
S08-A41	4_1	Unknown	1	sall4	Test	12.1580220908236	89.1441935446344	0.948786127564933	Pass	0.00681715441030155
S08-A42	4_1	Unknown	1	xpc	Test	9.50053178928703	126.24466061232	1	Pass	0.00548824355156608
S08-A43	4_1	Unknown	1	Cyp26a1	Test	11.9278616693435	93.9569126654821	1	Pass	0.00883074677869744
S08-A44	4_1	Unknown	1	Fgf8a
S08-A45	4_1	Unknown	1	Igf1ra	Test	8.94028065622825	104.385439408876	1	Pass	0.00648470647509694
S08-A46	4_1	Unknown	1	nanog	Test	19.6343916799167	36866.0556787043	1	Pass	0.0080293555926136
S08-A47	4_1	Unknown	1	spop	Test	8.98443043714132	116.215324398151	1	Pass	0.00683061453397148
S08-A48	4_1	Unknown	1	yap1	Test	8.7841287168593	160.086443156335	0.937820206435629	Pass	0.00384749366749803
S14-A01	4_2	Unknown	1	actb1	Test	6.20950472045784	83.4418716604492	0.872584425730186	Pass	0.00515123486432751
S14-A02	4_2	Unknown	1	dnmt1	Test	10.0159238230268	60.5101869530912	1	Pass	0.00838036413701631
S14-A03	4_2	Unknown	1	Fgfr4	Test	10.42362359574	72.3591829117108	1	Pass	0.00765676153628628
S14-A04	4_2	Unknown	1	jmjd6	Test	10.6402255805067	43.9467653139298	1	Pass	0.0067923511426121
S14-A05	4_2	Unknown	1	neil1	Test	10.8834331108555	30.8015612940137	1	Pass	0.0078521262809567
S14-A06	4_2	Unknown	1	tdg.1	Test	10.2376738930554	103.091949114923	0.903264545172243	Pass	0.00651112676535075
S14-A07	4_2	Unknown	1	Fgf4	Test	13.1688124670504	196.869289900283	0.969775208387822	Pass	0.00585753619118968
S14-A08	4_2	Unknown	1	dnmt3aa	Test	9.47030214951	91.2911577966083	1	Pass	0.00720457938855895
S14-A09	4_2	Unknown	1	foxo3a	Test	7.78877188313209	90.1316692294501	1	Pass	0.00894309864058025
S14-A10	4_2	Unknown	1	kdm2aa	Test	9.00550824955471	83.5540893954383	1	Pass	0.00799264174920814
S14-A11	4_2	Unknown	1	ogt.1	Test	9.10404112496189	82.0508331218928	1	Pass	0.00580787823573391
S14-A12	4_2	Unknown	1	tert	Test	14.3633095032059	109.966269780521	0.996080086366826	Pass	0.00846945269463405
S14-A13	4_2	Unknown	1	Aldh1a2	Test	11.1132625672466	60.2673635167185	0.971840436156597	Pass	0.00632939983004382
S14-A14	4_2	Unknown	1	dnmt3ab	Test	8.32276004768205	118.035464112743	1	Pass	0.00931843179675896
S14-A15	4_2	Unknown	1	gadd45aa	Test	10.6677429239916	100.587148189753	1	Pass	0.00880831281487657
S14-A16	4_2	Unknown	1	kdm4b/jmjd2b	Test	9.39325555387936	76.5272297001083	1	Pass	0.00927896985905001
S14-A17	4_2	Unknown	1	pou5f3	Test	18.7187123965478	-1	0.969005613748013	Pass	0.00450652254380955
S14-A18	4_2	Unknown	1	tet3	Test	8.77655251622004	102.984261719909	1	Pass	0.00750583387196605
S14-A19	4_2	Unknown	1	Axin2	Test	9.79190787914085	52.5381872294329	1	Pass	0.00461906985014386
S14-A20	4_2	Unknown	1	dnmt3ba	Test	11.4391298177137	64.4140715402621	1	Pass	0.00597259676966606
S14-A21	4_2	Unknown	1	gadd45ab	Test	9.23862546706243	89.2209495859872	1	Pass	0.00665105353454544
S14-A22	4_2	Unknown	1	lats1	Test	9.98986611370621	69.663033328655	1	Pass	0.00662357811419632
S14-A23	4_2	Unknown	1	Rarab	Test	9.3305983785829	97.1095121317667	1	Pass	0.00787731352009684
S14-A24	4_2	Unknown	1	ved	Test	12.7723456611878	70.0292435204921	0.951014980000472	Pass	0.00621567465591404
S14-A25	4_2	Unknown	1	cdkn2c	Test	12.9259980103388	184.703797347967	1	Pass	0.00783619584131053
S14-A26	4_2	Unknown	1	dnmt3bb.1	Test	12.7489608686798	47.7183310150152	1	Pass	0.00423247310552466
S14-A27	4_2	Unknown	1	hdac1	Test	8.87046639613391	81.2141860849574	1	Pass	0.00482340564875717
S14-A28	4_2	Unknown	1	lin28a	Test	14.085249495349	91.7198624843261	1	Pass	0.00685732601660462
S14-A29	4_2	Unknown	1	Rpl13a1	Test	4.52251695693251	68.4567962068567	0.84083898564417	Pass	0.0103523231385501
S14-A30	4_2	Unknown	1	vent
S14-A31	4_2	Unknown	1	Crabp1b	Test	12.9596633682322	50.722318114723	1	Pass	0.00704322330326988
S14-A32	4_2	Unknown	1	Dusp6	Test	6.74683408432375	109.694384791167	1	Pass	0.0114011679183338
S14-A33	4_2	Unknown	1	Ifg1rb	Test	9.19861255076385	97.9207118601519	1	Pass	0.00843121681178218
S14-A34	4_2	Unknown	1	mycb	Test	9.09404673588625	90.3968576252969	1	Pass	0.00834510025919904
S14-A35	4_2	Unknown	1	Rpl13a2	Test	4.32773107563204	64.4927907041592	0.733738889324654	Pass	0.00967061280246088
S14-A36	4_2	Unknown	1	vox	Test	14.9114486261475	68.660172107681	1	Pass	0.00881965691216683
S14-A37	4_2	Unknown	1	Crabp2a	Test	11.3454404257601	46.6215898400694	1	Pass	0.00685417042127909
S14-A38	4_2	Unknown	1	ezh2	Test	11.7293357670379	85.0316662038107	1	Pass	0.00764759834232412
S14-A39	4_2	Unknown	1	Igf1	Test	13.2725363069909	91.7157005563942	1	Pass	0.0083332072578722
S14-A40	4_2	Unknown	1	mycla	Test	12.5092297511528	47.5939437304616	1	Pass	0.0127686116084135
S14-A41	4_2	Unknown	1	sall4	Test	12.9964946073639	54.7059534935458	1	Pass	0.00681715441030155
S14-A42	4_2	Unknown	1	xpc	Test	11.9686773987136	22.3460778081876	1	Pass	0.00548824355156608
S14-A43	4_2	Unknown	1	Cyp26a1	Test	12.655387284421	55.3569385627237	1	Pass	0.00883074677869744
S14-A44	4_2	Unknown	1	Fgf8a
S14-A45	4_2	Unknown	1	Igf1ra	Test	8.74842879178957	120.366672603478	1	Pass	0.00648470647509694
S14-A46	4_2	Unknown	1	nanog	Test	18.9271210974072	3907.44298704849	1	Pass	0.0080293555926136
S14-A47	4_2	Unknown	1	spop	Test	8.95427487905384	118.832217963311	1	Pass	0.00683061453397148
S14-A48	4_2	Unknown	1	yap1	Test	8.41915519281114	208.399837141926	0.977374509554934	Pass	0.00384749366749803
S20-A01	4_3	Unknown	1	actb1	Test	4.86355521634581	215.811408393971	0.936573876685873	Pass	0.00515123486432751
S20-A02	4_3	Unknown	1	dnmt1	Test	9.05885751963293	103.292668208007	1	Pass	0.00838036413701631
S20-A03	4_3	Unknown	1	Fgfr4	Test	9.3050350702546	137.623058541899	0.998481121732348	Pass	0.00765676153628628
S20-A04	4_3	Unknown	1	jmjd6	Test	9.64345957744052	77.2829394081894	1	Pass	0.0067923511426121
S20-A05	4_3	Unknown	1	neil1	Test	10.0133333482289	58.0409575889924	0.986698824526891	Pass	0.0078521262809567
S20-A06	4_3	Unknown	1	tdg.1	Test	9.15204122923187	242.310320184343	0.888726764582219	Pass	0.00651112676535075
S20-A07	4_3	Unknown	1	Fgf4	Test	11.2727898385815	1332.49918350257	0.974762800158698	Pass	0.00585753619118968
S20-A08	4_3	Unknown	1	dnmt3aa	Test	8.37198626146922	173.900901056103	1	Pass	0.00720457938855895
S20-A09	4_3	Unknown	1	foxo3a	Test	7.07260057495603	150.841724522387	0.906229584030124	Pass	0.00894309864058025
S20-A10	4_3	Unknown	1	kdm2aa	Test	8.44117356225585	124.249537622317	1	Pass	0.00799264174920814
S20-A11	4_3	Unknown	1	ogt.1	Test	8.35707693032724	131.344315126431	1	Pass	0.00580787823573391
S20-A12	4_3	Unknown	1	tert	Test	12.7129421510108	447.421575672936	1	Pass	0.00846945269463405
S20-A13	4_3	Unknown	1	Aldh1a2	Test	9.46246315195618	201.405196406534	0.970069347280068	Pass	0.00632939983004382
S20-A14	4_3	Unknown	1	dnmt3ab	Test	7.70631116174913	185.384858461925	1	Pass	0.00931843179675896
S20-A15	4_3	Unknown	1	gadd45aa	Test	8.8604553479761	418.559314645288	1	Pass	0.00880831281487657
S20-A16	4_3	Unknown	1	kdm4b/jmjd2b	Test	8.41915052265756	142.905005701977	1	Pass	0.00927896985905001
S20-A17	4_3	Unknown	1	pou5f3	Test	17.0368820281329	-1	0.829013858980697	Pass	0.00450652254380955
S20-A18	4_3	Unknown	1	tet3	Test	7.97670498677935	179.014966642175	1	Pass	0.00750583387196605
S20-A19	4_3	Unknown	1	Axin2	Test	8.69733257253734	94.0001506322504	0.971531854447798	Pass	0.00461906985014386
S20-A20	4_3	Unknown	1	dnmt3ba	Test	10.4149383246504	127.703275138963	1	Pass	0.00597259676966606
S20-A21	4_3	Unknown	1	gadd45ab	Test	8.35487969794605	182.963634033384	1	Pass	0.00665105353454544
S20-A22	4_3	Unknown	1	lats1	Test	9.30255905883924	108.812179204184	1	Pass	0.00662357811419632
S20-A23	4_3	Unknown	1	Rarab	Test	8.5929636418375	167.008215623108	1	Pass	0.00787731352009684
S20-A24	4_3	Unknown	1	ved	Test	12.333269508688	95.0330006467153	0.892101078425406	Pass	0.00621567465591404
S20-A25	4_3	Unknown	1	cdkn2c	Test	11.917959844103	410.218553573313	1	Pass	0.00783619584131053
S20-A26	4_3	Unknown	1	dnmt3bb.1	Test	10.686310253865	236.976639252222	1	Pass	0.00423247310552466
S20-A27	4_3	Unknown	1	hdac1	Test	7.80402664410842	162.07770865658	1	Pass	0.00482340564875717
S20-A28	4_3	Unknown	1	lin28a	Test	11.9947127256473	553.621815154321	1	Pass	0.00685732601660462
S20-A29	4_3	Unknown	1	Rpl13a1	Test	3.93325585868338	107.117433670261	0.644418619561126	Fail	0.0103523231385501
S20-A30	4_3	Unknown	1	vent
S20-A31	4_3	Unknown	1	Crabp1b	Test	11.4063672612156	129.372953670279	1	Pass	0.00704322330326988
S20-A32	4_3	Unknown	1	Dusp6	Test	5.90658389673118	201.092042339372	1	Pass	0.0114011679183338
S20-A33	4_3	Unknown	1	Ifg1rb	Test	8.0964492460688	214.022140067035	1	Pass	0.00843121681178218
S20-A34	4_3	Unknown	1	mycb	Test	8.19930780240743	174.864006017209	1	Pass	0.00834510025919904
S20-A35	4_3	Unknown	1	Rpl13a2	Test	3.87682906102098	91.3586982016386	0.625609687006994	Fail	0.00967061280246088
S20-A36	4_3	Unknown	1	vox	Test	14.9510709494023	66.4977224000517	1	Pass	0.00881965691216683
S20-A37	4_3	Unknown	1	Crabp2a	Test	9.00364419041449	203.925357844399	1	Pass	0.00685417042127909
S20-A38	4_3	Unknown	1	ezh2	Test	10.1701528866259	242.176009435414	1	Pass	0.00764759834232412
S20-A39	4_3	Unknown	1	Igf1	Test	11.9431691352106	226.696477158625	1	Pass	0.0083332072578722
S20-A40	4_3	Unknown	1	mycla	Test	11.3657140523553	100.795466943716	1	Pass	0.0127686116084135
S20-A41	4_3	Unknown	1	sall4	Test	11.6049498322132	123.018610930171	0.988287998146005	Pass	0.00681715441030155
S20-A42	4_3	Unknown	1	xpc	Test	10.929944467324	46.3115862172795	1	Pass	0.00548824355156608
S20-A43	4_3	Unknown	1	Cyp26a1	Test	11.1006435744513	171.46238344769	1	Pass	0.00883074677869744
S20-A44	4_3	Unknown	1	Fgf8a
S20-A45	4_3	Unknown	1	Igf1ra	Test	8.1867557813841	182.653728955312	0.959520959444473	Pass	0.00648470647509694
S20-A46	4_3	Unknown	1	nanog	Test	16.8169881150031	4.82820627318234	1	Pass	0.0080293555926136
S20-A47	4_3	Unknown	1	spop	Test	8.60070826260789	154.284409372458	1	Pass	0.00683061453397148
S20-A48	4_3	Unknown	1	yap1	Test	8.03512625126258	275.055619796334	0.863186444720033	Pass	0.00384749366749803
S26-A01	5_1	Unknown	1	actb1	Test	5.21828138961975	168.000081277325	0.848278937441102	Pass	0.00515123486432751
S26-A02	5_1	Unknown	1	dnmt1	Test	9.24123025675326	93.2856973802392	1	Pass	0.00838036413701631
S26-A03	5_1	Unknown	1	Fgfr4	Test	9.8271372811156	101.947245141666	1	Pass	0.00765676153628628
S26-A04	5_1	Unknown	1	jmjd6	Test	9.01720798627257	110.182225954377	0.977820501945278	Pass	0.0067923511426121
S26-A05	5_1	Unknown	1	neil1	Test	9.56417503525607	80.4965305968984	1	Pass	0.0078521262809567
S26-A06	5_1	Unknown	1	tdg.1	Test	9.49670257474422	184.73191278223	0.902052167598201	Pass	0.00651112676535075
S26-A07	5_1	Unknown	1	Fgf4	Test	12.1678408004936	540.281336169176	0.946775757448695	Pass	0.00585753619118968
S26-A08	5_1	Unknown	1	dnmt3aa	Test	9.49870680914954	89.7822805915401	1	Pass	0.00720457938855895
S26-A09	5_1	Unknown	1	foxo3a	Test	7.62041580302631	101.730505833021	1	Pass	0.00894309864058025
S26-A10	5_1	Unknown	1	kdm2aa	Test	8.63257262813171	108.604680324363	1	Pass	0.00799264174920814
S26-A11	5_1	Unknown	1	ogt.1	Test	8.50367333732363	119.759665166861	1	Pass	0.00580787823573391
S26-A12	5_1	Unknown	1	tert	Test	13.8855483253171	165.07829343508	1	Pass	0.00846945269463405
S26-A13	5_1	Unknown	1	Aldh1a2	Test	10.6662922724272	83.5520796796649	1	Pass	0.00632939983004382
S26-A14	5_1	Unknown	1	dnmt3ab	Test	8.6349341769267	93.9129405780238	1	Pass	0.00931843179675896
S26-A15	5_1	Unknown	1	gadd45aa	Test	8.83431290566632	427.281371122315	1	Pass	0.00880831281487657
S26-A16	5_1	Unknown	1	kdm4b/jmjd2b	Test	8.67696417827577	121.132692878851	1	Pass	0.00927896985905001
S26-A17	5_1	Unknown	1	pou5f3	Test	18.0477659123541	-1	0.821134370190972	Pass	0.00450652254380955
S26-A18	5_1	Unknown	1	tet3	Test	8.57709055733915	118.208961174429	1	Pass	0.00750583387196605
S26-A19	5_1	Unknown	1	Axin2	Test	8.91953806827977	83.5292049156676	1	Pass	0.00461906985014386
S26-A20	5_1	Unknown	1	dnmt3ba	Test	10.7436691316549	102.518929420605	1	Pass	0.00597259676966606
S26-A21	5_1	Unknown	1	gadd45ab	Test	8.6097562359768	148.734565792186	1	Pass	0.00665105353454544
S26-A22	5_1	Unknown	1	lats1	Test	9.47531680896261	97.273912721455	1	Pass	0.00662357811419632
S26-A23	5_1	Unknown	1	Rarab	Test	9.04773012956249	119.553462527847	0.962156390663897	Pass	0.00787731352009684
S26-A24	5_1	Unknown	1	ved	Test	12.8445031872183	66.6022416584823	0.954567132185104	Pass	0.00621567465591404
S26-A25	5_1	Unknown	1	cdkn2c	Test	12.6118309353947	236.853043750962	1	Pass	0.00783619584131053
S26-A26	5_1	Unknown	1	dnmt3bb.1	Test	10.7715896952755	221.783311345771	0.969135107721543	Pass	0.00423247310552466
S26-A27	5_1	Unknown	1	hdac1	Test	8.13089832150214	131.142378308051	0.904667818720341	Pass	0.00482340564875717
S26-A28	5_1	Unknown	1	lin28a	Test	13.6541380461812	132.883168778582	1	Pass	0.00685732601660462
S26-A29	5_1	Unknown	1	Rpl13a1	Test	3.93507569400309	106.969422812096	0.645025231334364	Fail	0.0103523231385501
S26-A30	5_1	Unknown	1	vent
S26-A31	5_1	Unknown	1	Crabp1b	Test	11.7661403674322	104.149422908648	1	Pass	0.00704322330326988
S26-A32	5_1	Unknown	1	Dusp6	Test	6.14376657674709	169.471554413725	0.998557574109688	Pass	0.0114011679183338
S26-A33	5_1	Unknown	1	Ifg1rb	Test	8.54749799514171	155.413042215743	1	Pass	0.00843121681178218
S26-A34	5_1	Unknown	1	mycb	Test	8.68337450507713	122.369815142897	1	Pass	0.00834510025919904
S26-A35	5_1	Unknown	1	Rpl13a2	Test	3.93761839752641	87.1686507251391	0.64587279917547	Fail	0.00967061280246088
S26-A36	5_1	Unknown	1	vox	Test	16.4292201105799	20.1522733701439	1	Pass	0.00881965691216683
S26-A37	5_1	Unknown	1	Crabp2a	Test	10.5004294377745	79.4041060050731	1	Pass	0.00685417042127909
S26-A38	5_1	Unknown	1	ezh2	Test	10.8610780299725	152.301750267615	1	Pass	0.00764759834232412
S26-A39	5_1	Unknown	1	Igf1	Test	12.3788100972572	168.521822151037	1	Pass	0.0083332072578722
S26-A40	5_1	Unknown	1	mycla	Test	11.8130382257582	75.1551189238753	1	Pass	0.0127686116084135
S26-A41	5_1	Unknown	1	sall4	Test	11.547176374106	127.227891732126	0.965706525182524	Pass	0.00681715441030155
S26-A42	5_1	Unknown	1	xpc	Test	10.2972663925643	72.1869009510846	0.95144048564194	Pass	0.00548824355156608
S26-A43	5_1	Unknown	1	Cyp26a1	Test	12.6065617645322	57.3576615989313	1	Pass	0.00883074677869744
S26-A44	5_1	Unknown	1	Fgf8a
S26-A45	5_1	Unknown	1	Igf1ra	Test	8.33819392122775	163.227901010273	0.964614520466092	Pass	0.00648470647509694
S26-A46	5_1	Unknown	1	nanog	Test	17.826782106572	118.972436812163	1	Pass	0.0080293555926136
S26-A47	5_1	Unknown	1	spop	Test	8.80616114657929	132.566523981967	1	Pass	0.00683061453397148
S26-A48	5_1	Unknown	1	yap1	Test	8.5217431999064	193.509052958757	0.944248278532244	Pass	0.00384749366749803
S32-A01	5_2	Unknown	1	actb1	Test	5.01563941023405	193.83976369585	0.807129102839001	Pass	0.00515123486432751
S32-A02	5_2	Unknown	1	dnmt1	Test	9.31235218975041	89.6513155673762	1	Pass	0.00838036413701631
S32-A03	5_2	Unknown	1	Fgfr4	Test	9.8765876283359	99.0906740718641	1	Pass	0.00765676153628628
S32-A04	5_2	Unknown	1	jmjd6	Test	9.96233753215905	64.514141291313	1	Pass	0.0067923511426121
S32-A05	5_2	Unknown	1	neil1	Test	9.87743495322672	64.0783484956758	1	Pass	0.0078521262809567
S32-A06	5_2	Unknown	1	tdg.1	Test	9.93173748284108	131.164338373749	1	Pass	0.00651112676535075
S32-A07	5_2	Unknown	1	Fgf4	Test	11.4716614557541	1090.32990747122	0.995946909593857	Pass	0.00585753619118968
S32-A08	5_2	Unknown	1	dnmt3aa	Test	9.61231846162825	83.9924180724768	1	Pass	0.00720457938855895
S32-A09	5_2	Unknown	1	foxo3a	Test	7.7477195947145	92.8318731888914	1	Pass	0.00894309864058025
S32-A10	5_2	Unknown	1	kdm2aa	Test	9.01699048889202	82.8822355497701	1	Pass	0.00799264174920814
S32-A11	5_2	Unknown	1	ogt.1	Test	8.97842877135162	88.8062681638019	1	Pass	0.00580787823573391
S32-A12	5_2	Unknown	1	tert	Test	13.2446306896802	284.689749725307	0.965348409670166	Pass	0.00846945269463405
S32-A13	5_2	Unknown	1	Aldh1a2	Test	10.0351844584895	132.519669533889	0.92732511745412	Pass	0.00632939983004382
S32-A14	5_2	Unknown	1	dnmt3ab	Test	8.40716814137232	110.960011537562	1	Pass	0.00931843179675896
S32-A15	5_2	Unknown	1	gadd45aa	Test	9.97364280845412	173.922475923228	1	Pass	0.00880831281487657
S32-A16	5_2	Unknown	1	kdm4b/jmjd2b	Test	9.13401652815185	90.3647276649884	1	Pass	0.00927896985905001
S32-A17	5_2	Unknown	1	pou5f3	Test	16.2268017193467	-1	0.84776060001189	Pass	0.00450652254380955
S32-A18	5_2	Unknown	1	tet3	Test	8.76644256599464	103.706486460609	1	Pass	0.00750583387196605
S32-A19	5_2	Unknown	1	Axin2	Test	9.14575611693469	74.0665225567482	0.895082865387806	Pass	0.00461906985014386
S32-A20	5_2	Unknown	1	dnmt3ba	Test	10.7303528366588	103.435224878407	1	Pass	0.00597259676966606
S32-A21	5_2	Unknown	1	gadd45ab	Test	8.55042370226528	156.08169619683	1	Pass	0.00665105353454544
S32-A22	5_2	Unknown	1	lats1	Test	9.59584526293013	89.9565663291768	1	Pass	0.00662357811419632
S32-A23	5_2	Unknown	1	Rarab	Test	8.96678228736739	126.882942039938	1	Pass	0.00787731352009684
S32-A24	5_2	Unknown	1	ved	Test	12.5158549400938	83.70205741239	0.925667829730407	Pass	0.00621567465591404
S32-A25	5_2	Unknown	1	cdkn2c	Test	12.7630473626745	210.133052676478	1	Pass	0.00783619584131053
S32-A26	5_2	Unknown	1	dnmt3bb.1	Test	11.5659563858911	119.640432010885	1	Pass	0.00423247310552466
S32-A27	5_2	Unknown	1	hdac1	Test	8.2309716900878	122.908765230251	0.927133974287459	Pass	0.00482340564875717
S32-A28	5_2	Unknown	1	lin28a	Test	13.3108964288372	178.508925367898	1	Pass	0.00685732601660462
S32-A29	5_2	Unknown	1	Rpl13a1	Test	4.05731895090388	97.4814512335858	0.604773165944746	Fail	0.0103523231385501
S32-A30	5_2	Unknown	1	vent
S32-A31	5_2	Unknown	1	Crabp1b	Test	11.7044264690869	108.096897129676	1	Pass	0.00704322330326988
S32-A32	5_2	Unknown	1	Dusp6	Test	6.50300051887844	130.78739072582	1	Pass	0.0114011679183338
S32-A33	5_2	Unknown	1	Ifg1rb	Test	9.40081560555749	84.8348706016409	1	Pass	0.00843121681178218
S32-A34	5_2	Unknown	1	mycb	Test	8.13373770159579	183.526912048562	1	Pass	0.00834510025919904
S32-A35	5_2	Unknown	1	Rpl13a2	Test	3.95054231064264	86.3029151394135	0.650180770214213	Pass	0.00967061280246088
S32-A36	5_2	Unknown	1	vox	Test	16.5631606705757	18.0859951225605	1	Pass	0.00881965691216683
S32-A37	5_2	Unknown	1	Crabp2a	Test	9.48475150371377	150.59328709605	1	Pass	0.00685417042127909
S32-A38	5_2	Unknown	1	ezh2	Test	11.1692787974244	123.838236827878	1	Pass	0.00764759834232412
S32-A39	5_2	Unknown	1	Igf1	Test	12.6312259962132	141.91698741964	1	Pass	0.0083332072578722
S32-A40	5_2	Unknown	1	mycla	Test	11.4023616123959	98.400397406861	1	Pass	0.0127686116084135
S32-A41	5_2	Unknown	1	sall4	Test	11.903775157483	103.370060123892	0.980722385484418	Pass	0.00681715441030155
S32-A42	5_2	Unknown	1	xpc	Test	11.589041225658	29.1656384191098	0.984616005128374	Pass	0.00548824355156608
S32-A43	5_2	Unknown	1	Cyp26a1	Test	11.4575553781893	132.267792383435	1	Pass	0.00883074677869744
S32-A44	5_2	Unknown	1	Fgf8a
S32-A45	5_2	Unknown	1	Igf1ra	Test	8.96397304746785	102.565158501878	1	Pass	0.00648470647509694
S32-A46	5_2	Unknown	1	nanog	Test	17.6592164281017	69.9058576045122	0.999888095684127	Pass	0.0080293555926136
S32-A47	5_2	Unknown	1	spop	Test	9.08869555569223	107.603367437984	0.902805268119112	Pass	0.00683061453397148
S32-A48	5_2	Unknown	1	yap1	Test	8.62325477822671	179.822083274725	0.902259126437573	Pass	0.00384749366749803
S38-A01	5_3	Unknown	1	actb1	Test	5.14323708626188	177.141091134622	0.815453932871246	Pass	0.00515123486432751
S38-A02	5_3	Unknown	1	dnmt1	Test	10.1477017603467	56.2148890612361	1	Pass	0.00838036413701631
S38-A03	5_3	Unknown	1	Fgfr4	Test	9.85879112020821	100.109376623221	1	Pass	0.00765676153628628
S38-A04	5_3	Unknown	1	jmjd6	Test	10.2454604275623	54.9566489281093	1	Pass	0.0067923511426121
S38-A05	5_3	Unknown	1	neil1	Test	10.5722498217504	38.6350845372766	1	Pass	0.0078521262809567
S38-A06	5_3	Unknown	1	tdg.1	Test	10.0446169967713	120.012215629343	0.878306000615295	Pass	0.00651112676535075
S38-A07	5_3	Unknown	1	Fgf4	Test	11.0188909955797	1721.38813363927	0.927457539906887	Pass	0.00585753619118968
S38-A08	5_3	Unknown	1	dnmt3aa	Test	9.69738470044119	79.9030735325644	1	Pass	0.00720457938855895
S38-A09	5_3	Unknown	1	foxo3a	Test	8.04532705707677	74.9481721518069	0.899814615099299	Pass	0.00894309864058025
S38-A10	5_3	Unknown	1	kdm2aa	Test	9.29035286572198	68.3890600015776	1	Pass	0.00799264174920814
S38-A11	5_3	Unknown	1	ogt.1	Test	9.10280141474966	82.1149270866818	0.968168576385493	Pass	0.00580787823573391
S38-A12	5_3	Unknown	1	tert	Test	13.7048051962728	192.502273770078	1	Pass	0.00846945269463405
S38-A13	5_3	Unknown	1	Aldh1a2	Test	10.1328506079125	123.389909145322	0.936879573905832	Pass	0.00632939983004382
S38-A14	5_3	Unknown	1	dnmt3ab	Test	8.89407903604863	77.6791279420409	1	Pass	0.00931843179675896
S38-A15	5_3	Unknown	1	gadd45aa	Test	9.67697824083692	219.78557925171	1	Pass	0.00880831281487657
S38-A16	5_3	Unknown	1	kdm4b/jmjd2b	Test	9.33542260245173	79.4180275715489	1	Pass	0.00927896985905001
S38-A17	5_3	Unknown	1	pou5f3	Test	16.3511471376013	-1	0.896809907877904	Pass	0.00450652254380955
S38-A18	5_3	Unknown	1	tet3	Test	9.05429802912135	84.9943740636186	0.97918767189952	Pass	0.00750583387196605
S38-A19	5_3	Unknown	1	Axin2	Test	9.5616549905119	59.3776234863518	0.962143235475847	Pass	0.00461906985014386
S38-A20	5_3	Unknown	1	dnmt3ba	Test	11.2176408089395	74.6890712489651	0.966265944478593	Pass	0.00597259676966606
S38-A21	5_3	Unknown	1	gadd45ab	Test	9.2665462070007	87.2193512623859	1	Pass	0.00665105353454544
S38-A22	5_3	Unknown	1	lats1	Test	10.2370357007641	59.3407278130944	1	Pass	0.00662357811419632
S38-A23	5_3	Unknown	1	Rarab	Test	9.34180638251846	96.3127596989281	1	Pass	0.00787731352009684
S38-A24	5_3	Unknown	1	ved	Test	13.4297619341643	44.3352018826694	0.89731073086079	Pass	0.00621567465591404
S38-A25	5_3	Unknown	1	cdkn2c	Test	12.8505412525297	196.072216139809	1	Pass	0.00783619584131053
S38-A26	5_3	Unknown	1	dnmt3bb.1	Test	11.5879808146343	117.610488819064	0.998558372863107	Pass	0.00423247310552466
S38-A27	5_3	Unknown	1	hdac1	Test	8.60331408890149	96.5622472921852	0.972727197399219	Pass	0.00482340564875717
S38-A28	5_3	Unknown	1	lin28a	Test	13.4864344851515	153.497740425848	1	Pass	0.00685732601660462
S38-A29	5_3	Unknown	1	Rpl13a1	Test	4.42363106025502	73.7983762106681	0.774483228786631	Pass	0.0103523231385501
S38-A30	5_3	Unknown	1	vent
S38-A31	5_3	Unknown	1	Crabp1b	Test	11.4948460590694	122.653580199625	0.98336859334639	Pass	0.00704322330326988
S38-A32	5_3	Unknown	1	Dusp6	Test	6.8619244719767	100.955978601274	1	Pass	0.0114011679183338
S38-A33	5_3	Unknown	1	Ifg1rb	Test	9.45870005074829	81.4216321162668	1	Pass	0.00843121681178218
S38-A34	5_3	Unknown	1	mycb	Test	9.02599139308225	95.0492262161174	1	Pass	0.00834510025919904
S38-A35	5_3	Unknown	1	Rpl13a2	Test	4.2636950395153	67.7625493427986	0.673071418836842	Pass	0.00967061280246088
S38-A36	5_3	Unknown	1	vox	Test	15.6325022304582	38.3517026777954	1	Pass	0.00881965691216683
S38-A37	5_3	Unknown	1	Crabp2a	Test	9.64965872774481	135.729771059294	1	Pass	0.00685417042127909
S38-A38	5_3	Unknown	1	ezh2	Test	11.0731409630972	132.093648739204	1	Pass	0.00764759834232412
S38-A39	5_3	Unknown	1	Igf1	Test	13.3131806440681	89.2129692645734	1	Pass	0.0083332072578722
S38-A40	5_3	Unknown	1	mycla	Test	12.1683192439021	59.5260975001724	0.975900701863102	Pass	0.0127686116084135
S38-A41	5_3	Unknown	1	sall4	Test	12.2211129697044	85.9283984353042	0.905197858784573	Pass	0.00681715441030155
S38-A42	5_3	Unknown	1	xpc	Test	12.0336774085984	21.349939715025	0.923654662708091	Pass	0.00548824355156608
S38-A43	5_3	Unknown	1	Cyp26a1	Test	11.6453123975142	115.387664784595	1	Pass	0.00883074677869744
S38-A44	5_3	Unknown	1	Fgf8a
S38-A45	5_3	Unknown	1	Igf1ra	Test	9.09603440982992	92.98526302423	0.933067381935814	Pass	0.00648470647509694
S38-A46	5_3	Unknown	1	nanog	Test	17.9367819211273	168.67239525811	1	Pass	0.0080293555926136
S38-A47	5_3	Unknown	1	spop	Test	9.34670184380117	88.9373034121722	0.924743581684586	Pass	0.00683061453397148
S38-A48	5_3	Unknown	1	yap1	Test	8.08401172170999	265.50846364936	0.936479211003023	Pass	0.00384749366749803
S44-A01	6_1	Unknown	1	actb1	Test	5.02019591835724	193.217194102425	0.802030752306451	Pass	0.00515123486432751
S44-A02	6_1	Unknown	1	dnmt1	Test	9.33263792362912	88.6408977096426	1	Pass	0.00838036413701631
S44-A03	6_1	Unknown	1	Fgfr4	Test	10.1516999074185	84.5990108799038	0.967247187833728	Pass	0.00765676153628628
S44-A04	6_1	Unknown	1	jmjd6	Test	9.30850507680067	93.425709203971	1	Pass	0.0067923511426121
S44-A05	6_1	Unknown	1	neil1	Test	9.23531238212834	102.27682812435	1	Pass	0.0078521262809567
S44-A06	6_1	Unknown	1	tdg.1	Test	9.64941983537011	163.806905790242	0.912702358134081	Pass	0.00651112676535075
S44-A07	6_1	Unknown	1	Fgf4	Test	11.9824179153826	651.385710225554	1	Pass	0.00585753619118968
S44-A08	6_1	Unknown	1	dnmt3aa	Test	9.8054457249971	74.9941434179986	1	Pass	0.00720457938855895
S44-A09	6_1	Unknown	1	foxo3a	Test	7.95697722155851	79.8639337302143	1	Pass	0.00894309864058025
S44-A10	6_1	Unknown	1	kdm2aa	Test	8.93752665678304	87.6449283159969	1	Pass	0.00799264174920814
S44-A11	6_1	Unknown	1	ogt.1	Test	8.58943405422657	113.462189996391	1	Pass	0.00580787823573391
S44-A12	6_1	Unknown	1	tert	Test	13.4559173247865	237.873822086458	0.997211556533614	Pass	0.00846945269463405
S44-A13	6_1	Unknown	1	Aldh1a2	Test	10.0702539447142	129.166164476843	0.915515764438017	Pass	0.00632939983004382
S44-A14	6_1	Unknown	1	dnmt3ab	Test	8.79261867619091	83.6707839985616	1	Pass	0.00931843179675896
S44-A15	6_1	Unknown	1	gadd45aa	Test	10.1940865110274	146.15951293626	0.996451667172305	Pass	0.00880831281487657
S44-A16	6_1	Unknown	1	kdm4b/jmjd2b	Test	9.5637017300914	68.6051425394201	1	Pass	0.00927896985905001
S44-A17	6_1	Unknown	1	pou5f3	Test	18.14320385447	-1	0.882845407004799	Pass	0.00450652254380955
S44-A18	6_1	Unknown	1	tet3	Test	8.89161784535595	95.1103185426787	1	Pass	0.00750583387196605
S44-A19	6_1	Unknown	1	Axin2	Test	9.18056584494922	72.7088137560192	0.957557898018798	Pass	0.00461906985014386
S44-A20	6_1	Unknown	1	dnmt3ba	Test	10.4294573502056	126.470315324014	0.996322650222697	Pass	0.00597259676966606
S44-A21	6_1	Unknown	1	gadd45ab	Test	9.36294475719602	80.6475502583426	1	Pass	0.00665105353454544
S44-A22	6_1	Unknown	1	lats1	Test	9.59767898515002	89.8496000672883	1	Pass	0.00662357811419632
S44-A23	6_1	Unknown	1	Rarab	Test	9.35068700711327	95.6861000673055	1	Pass	0.00787731352009684
S44-A24	6_1	Unknown	1	ved	Test	12.8462251558808	66.5225418788036	0.964335348443275	Pass	0.00621567465591404
S44-A25	6_1	Unknown	1	cdkn2c	Test	13.6661238367828	102.810677454585	1	Pass	0.00783619584131053
S44-A26	6_1	Unknown	1	dnmt3bb.1	Test	10.7086167279055	232.904803303077	0.977331555542007	Pass	0.00423247310552466
S44-A27	6_1	Unknown	1	hdac1	Test	8.23608689622647	122.502079065614	0.901145988122888	Pass	0.00482340564875717
S44-A28	6_1	Unknown	1	lin28a	Test	13.8408867996188	113.16840215185	1	Pass	0.00685732601660462
S44-A29	6_1	Unknown	1	Rpl13a1	Test	4.09754395264175	94.5471830063142	0.622014987005432	Fail	0.0103523231385501
S44-A30	6_1	Unknown	1	vent
S44-A31	6_1	Unknown	1	Crabp1b	Test	12.0709991572962	86.6655522999302	0.949658168424869	Pass	0.00704322330326988
S44-A32	6_1	Unknown	1	Dusp6	Test	7.24809622891158	76.4122111588915	1	Pass	0.0114011679183338
S44-A33	6_1	Unknown	1	Ifg1rb	Test	9.57656043582159	74.8904091910293	1	Pass	0.00843121681178218
S44-A34	6_1	Unknown	1	mycb	Test	9.16504600043977	85.7857728323939	1	Pass	0.00834510025919904
S44-A35	6_1	Unknown	1	Rpl13a2	Test	3.99377710360064	83.4687523273622	0.664592367866881	Pass	0.00967061280246088
S44-A36	6_1	Unknown	1	vox	Test	15.6107198774644	39.0323889657821	1	Pass	0.00881965691216683
S44-A37	6_1	Unknown	1	Crabp2a	Test	9.67227027672237	133.809506135551	1	Pass	0.00685417042127909
S44-A38	6_1	Unknown	1	ezh2	Test	10.5861805027755	183.166520550407	1	Pass	0.00764759834232412
S44-A39	6_1	Unknown	1	Igf1	Test	12.5904405967259	145.912258360451	1	Pass	0.0083332072578722
S44-A40	6_1	Unknown	1	mycla	Test	11.3994284709817	98.5899769829013	1	Pass	0.0127686116084135
S44-A41	6_1	Unknown	1	sall4	Test	12.0185019311954	96.6894673908786	0.890098093610027	Pass	0.00681715441030155
S44-A42	6_1	Unknown	1	xpc	Test	9.88374622270076	96.4833977804811	0.993879975781541	Pass	0.00548824355156608
S44-A43	6_1	Unknown	1	Cyp26a1	Test	12.0178337639848	88.0065599187579	1	Pass	0.00883074677869744
S44-A44	6_1	Unknown	1	Fgf8a
S44-A45	6_1	Unknown	1	Igf1ra	Test	9.16238261710681	88.5154059898622	0.939678563148022	Pass	0.00648470647509694
S44-A46	6_1	Unknown	1	nanog	Test	17.540895221528	48.0228222604079	0.999950867967994	Pass	0.0080293555926136
S44-A47	6_1	Unknown	1	spop	Test	9.24270624643926	96.0362202211867	0.927797282219532	Pass	0.00683061453397148
S44-A48	6_1	Unknown	1	yap1	Test	8.66815388186755	174.081230558738	0.919351796424612	Pass	0.00384749366749803
S03-A01	6_2	Unknown	1	actb1	Test	5.01279757428011	194.229067703224	0.800614466231667	Pass	0.00515123486432751
S03-A02	6_2	Unknown	1	dnmt1	Test	9.35126487024572	87.7231351565619	1	Pass	0.00838036413701631
S03-A03	6_2	Unknown	1	Fgfr4	Test	9.96252375831334	94.315547349355	1	Pass	0.00765676153628628
S03-A04	6_2	Unknown	1	jmjd6	Test	9.69521815410524	75.0504844376787	1	Pass	0.0067923511426121
S03-A05	6_2	Unknown	1	neil1	Test	9.94405039164737	61.0442454337481	1	Pass	0.0078521262809567
S03-A06	6_2	Unknown	1	tdg.1	Test	9.72371252237748	154.501832352674	0.936386021872743	Pass	0.00651112676535075
S03-A07	6_2	Unknown	1	Fgf4	Test	12.0628950434764	600.603593488355	0.950962104135573	Pass	0.00585753619118968
S03-A08	6_2	Unknown	1	dnmt3aa	Test	9.68587456915309	80.4445264556596	1	Pass	0.00720457938855895
S03-A09	6_2	Unknown	1	foxo3a	Test	7.67133709613776	98.0730400576388	1	Pass	0.00894309864058025
S03-A10	6_2	Unknown	1	kdm2aa	Test	8.85398577223066	92.9473700004333	1	Pass	0.00799264174920814
S03-A11	6_2	Unknown	1	ogt.1	Test	9.18877905782775	77.7863442507803	0.990470979923513	Pass	0.00580787823573391
S03-A12	6_2	Unknown	1	tert	Test	12.9451771084987	367.244941533782	1	Pass	0.00846945269463405
S03-A13	6_2	Unknown	1	Aldh1a2	Test	9.66524768230316	173.661609594856	1	Pass	0.00632939983004382
S03-A14	6_2	Unknown	1	dnmt3ab	Test	8.17466524937348	131.55704373646	1	Pass	0.00931843179675896
S03-A15	6_2	Unknown	1	gadd45aa	Test	8.88559687541538	410.339191249325	1	Pass	0.00880831281487657
S03-A16	6_2	Unknown	1	kdm4b/jmjd2b	Test	9.01027962698726	97.8255854688981	1	Pass	0.00927896985905001
S03-A17	6_2	Unknown	1	pou5f3	Test	15.6838617569456	-1	0.924825092884789	Pass	0.00450652254380955
S03-A18	6_2	Unknown	1	tet3	Test	8.6989516205923	108.659339677006	1	Pass	0.00750583387196605
S03-A19	6_2	Unknown	1	Axin2	Test	8.9825259700301	80.7791489361006	1	Pass	0.00461906985014386
S03-A20	6_2	Unknown	1	dnmt3ba	Test	10.6154691307299	111.688335034865	1	Pass	0.00597259676966606
S03-A21	6_2	Unknown	1	gadd45ab	Test	8.099096704234	225.235871504761	1	Pass	0.00665105353454544
S03-A22	6_2	Unknown	1	lats1	Test	9.7302082949248	82.4462546931035	1	Pass	0.00662357811419632
S03-A23	6_2	Unknown	1	Rarab	Test	8.74698402834821	149.131612737571	1	Pass	0.00787731352009684
S03-A24	6_2	Unknown	1	ved	Test	12.3171251749886	96.1058470333887	0.934820785443925	Pass	0.00621567465591404
S03-A25	6_2	Unknown	1	cdkn2c	Test	12.2694276396075	310.591134556502	1	Pass	0.00783619584131053
S03-A26	6_2	Unknown	1	dnmt3bb.1	Test	11.304255998833	146.617592354631	1	Pass	0.00423247310552466
S03-A27	6_2	Unknown	1	hdac1	Test	8.2539688140869	121.090916848715	0.948684328017297	Pass	0.00482340564875717
S03-A28	6_2	Unknown	1	lin28a	Test	12.1465664008906	485.848222709377	1	Pass	0.00685732601660462
S03-A29	6_2	Unknown	1	Rpl13a1	Test	4.09893513948662	94.4472966682217	0.643327320812797	Fail	0.0103523231385501
S03-A30	6_2	Unknown	1	vent
S03-A31	6_2	Unknown	1	Crabp1b	Test	11.0848514111476	157.041552250834	0.960807803862577	Pass	0.00704322330326988
S03-A32	6_2	Unknown	1	Dusp6	Test	6.25434925130206	156.479161936389	1	Pass	0.0114011679183338
S03-A33	6_2	Unknown	1	Ifg1rb	Test	9.36256292357217	87.1686495436726	1	Pass	0.00843121681178218
S03-A34	6_2	Unknown	1	mycb	Test	7.95030592209998	210.109267582068	1	Pass	0.00834510025919904
S03-A35	6_2	Unknown	1	Rpl13a2	Test	3.89204450185675	90.2914098998458	0.630681500618917	Fail	0.00967061280246088
S03-A36	6_2	Unknown	1	vox	Test	15.5115090122664	42.2887466984925	1	Pass	0.00881965691216683
S03-A37	6_2	Unknown	1	Crabp2a	Test	8.93599402023515	212.80664904959	1	Pass	0.00685417042127909
S03-A38	6_2	Unknown	1	ezh2	Test	10.648872095386	175.618208050184	1	Pass	0.00764759834232412
S03-A39	6_2	Unknown	1	Igf1	Test	13.210289172348	95.6854317001074	1	Pass	0.0083332072578722
S03-A40	6_2	Unknown	1	mycla	Test	11.2865534549525	106.169774407931	1	Pass	0.0127686116084135
S03-A41	6_2	Unknown	1	sall4	Test	12.3372008846985	80.3113395078446	0.957821161114588	Pass	0.00681715441030155
S03-A42	6_2	Unknown	1	xpc	Test	11.1068975846696	40.9048075664964	0.929080562700154	Pass	0.00548824355156608
S03-A43	6_2	Unknown	1	Cyp26a1	Test	10.9581417744369	190.183013627979	1	Pass	0.00883074677869744
S03-A44	6_2	Unknown	1	Fgf8a
S03-A45	6_2	Unknown	1	Igf1ra	Test	8.72724872794584	122.274578647146	1	Pass	0.00648470647509694
S03-A46	6_2	Unknown	1	nanog	Test	17.338507284014	25.2652818657698	0.993678674564387	Pass	0.0080293555926136
S03-A47	6_2	Unknown	1	spop	Test	8.72891919736264	140.347651241363	1	Pass	0.00683061453397148
S03-A48	6_2	Unknown	1	yap1	Test	8.25674844686587	234.351047355973	0.961007810559288	Pass	0.00384749366749803
S09-A01	6_3	Unknown	1	actb1	Test	5.29067877452762	159.628803038444	0.865329180266368	Pass	0.00515123486432751
S09-A02	6_3	Unknown	1	dnmt1	Test	9.59310944259411	76.6352043104715	1	Pass	0.00838036413701631
S09-A03	6_3	Unknown	1	Fgfr4	Test	9.91440986112284	96.959959619947	1	Pass	0.00765676153628628
S09-A04	6_3	Unknown	1	jmjd6	Test	10.3109337413838	52.9562156839205	1	Pass	0.0067923511426121
S09-A05	6_3	Unknown	1	neil1	Test	9.85009454076123	65.3668397475486	1	Pass	0.0078521262809567
S09-A06	6_3	Unknown	1	tdg.1	Test	10.1044785832528	114.488131380927	0.923928892589168	Pass	0.00651112676535075
S09-A07	6_3	Unknown	1	Fgf4	Test	12.223175728101	510.954655252554	0.974774451375345	Pass	0.00585753619118968
S09-A08	6_3	Unknown	1	dnmt3aa	Test	9.44664013529981	92.5674446671307	1	Pass	0.00720457938855895
S09-A09	6_3	Unknown	1	foxo3a	Test	7.73925640244629	93.3985162695845	1	Pass	0.00894309864058025
S09-A10	6_3	Unknown	1	kdm2aa	Test	9.15018957335887	75.4722594879417	1	Pass	0.00799264174920814
S09-A11	6_3	Unknown	1	ogt.1	Test	8.99024442682968	88.1478060682494	1	Pass	0.00580787823573391
S09-A12	6_3	Unknown	1	tert	Test	13.4268014390115	243.836512114597	1	Pass	0.00846945269463405
S09-A13	6_3	Unknown	1	Aldh1a2	Test	10.3149843047988	108.010923424104	0.997021648729775	Pass	0.00632939983004382
S09-A14	6_3	Unknown	1	dnmt3ab	Test	8.49290802266824	104.207001384083	1	Pass	0.00931843179675896
S09-A15	6_3	Unknown	1	gadd45aa	Test	9.51532726776002	249.680253968568	1	Pass	0.00880831281487657
S09-A16	6_3	Unknown	1	kdm4b/jmjd2b	Test	9.10100553493675	92.2976366576799	1	Pass	0.00927896985905001
S09-A17	6_3	Unknown	1	pou5f3	Test	19.3593334245771	-1	0.905486219483392	Pass	0.00450652254380955
S09-A18	6_3	Unknown	1	tet3	Test	8.62306386816656	114.511464343417	1	Pass	0.00750583387196605
S09-A19	6_3	Unknown	1	Axin2	Test	9.64342229823783	56.852427510459	1	Pass	0.00461906985014386
S09-A20	6_3	Unknown	1	dnmt3ba	Test	11.1087113897674	80.3282810573241	0.990717299173296	Pass	0.00597259676966606
S09-A21	6_3	Unknown	1	gadd45ab	Test	9.3248895191367	83.1805732760602	1	Pass	0.00665105353454544
S09-A22	6_3	Unknown	1	lats1	Test	9.98211206285846	70.0144017447289	1	Pass	0.00662357811419632
S09-A23	6_3	Unknown	1	Rarab	Test	8.87136937646362	136.101221660117	1	Pass	0.00787731352009684
S09-A24	6_3	Unknown	1	ved	Test	13.3688112176413	46.2546048501505	0.939620815669978	Pass	0.00621567465591404
S09-A25	6_3	Unknown	1	cdkn2c	Test	12.7064411649525	219.762825475975	1	Pass	0.00783619584131053
S09-A26	6_3	Unknown	1	dnmt3bb.1	Test	11.6255826892752	114.224085093099	1	Pass	0.00423247310552466
S09-A27	6_3	Unknown	1	hdac1	Test	8.22718753528775	123.210494319706	0.969374756015771	Pass	0.00482340564875717
S09-A28	6_3	Unknown	1	lin28a	Test	13.4235293398153	162.029869470072	1	Pass	0.00685732601660462
S09-A29	6_3	Unknown	1	Rpl13a1	Test	4.23843786703917	84.9486748126908	0.717085605413344	Pass	0.0103523231385501
S09-A30	6_3	Unknown	1	vent
S09-A31	6_3	Unknown	1	Crabp1b	Test	11.4392818519038	126.831355570842	1	Pass	0.00704322330326988
S09-A32	6_3	Unknown	1	Dusp6	Test	6.60770553420168	121.273738466441	1	Pass	0.0114011679183338
S09-A33	6_3	Unknown	1	Ifg1rb	Test	9.22316335513109	96.2299564680848	1	Pass	0.00843121681178218
S09-A34	6_3	Unknown	1	mycb	Test	9.20860740755394	83.073859811709	1	Pass	0.00834510025919904
S09-A35	6_3	Unknown	1	Rpl13a2	Test	3.99477149853224	83.4046737870774	0.664923832844079	Pass	0.00967061280246088
S09-A36	6_3	Unknown	1	vox	Test	15.140780616899	57.0510042035915	1	Pass	0.00881965691216683
S09-A37	6_3	Unknown	1	Crabp2a	Test	9.65294733239953	135.448786160034	1	Pass	0.00685417042127909
S09-A38	6_3	Unknown	1	ezh2	Test	10.7491616484131	164.184445070113	1	Pass	0.00764759834232412
S09-A39	6_3	Unknown	1	Igf1	Test	12.8483583095493	122.417502261136	1	Pass	0.0083332072578722
S09-A40	6_3	Unknown	1	mycla	Test	11.6269566971811	84.9160415578385	1	Pass	0.0127686116084135
S09-A41	6_3	Unknown	1	sall4	Test	12.3124906229669	81.4753722094604	0.977077154127967	Pass	0.00681715441030155
S09-A42	6_3	Unknown	1	xpc	Test	11.2324468817339	37.4559764942754	0.98389758006934	Pass	0.00548824355156608
S09-A43	6_3	Unknown	1	Cyp26a1	Test	11.6313096206604	116.568589035898	1	Pass	0.00883074677869744
S09-A44	6_3	Unknown	1	Fgf8a
S09-A45	6_3	Unknown	1	Igf1ra	Test	8.61153544206471	133.244764693049	1	Pass	0.00648470647509694
S09-A46	6_3	Unknown	1	nanog	Test	18.2638985870333	476.281859925445	0.983011373606119	Pass	0.0080293555926136
S09-A47	6_3	Unknown	1	spop	Test	8.95843922213897	118.467359818954	1	Pass	0.00683061453397148
S09-A48	6_3	Unknown	1	yap1	Test	8.59222027775935	183.900475565697	1	Pass	0.00384749366749803
S27-A01	7_1_2	Unknown	1	actb1	Test	5.29725594006951	158.889277230492	0.843517163172667	Pass	0.00515123486432751
S27-A02	7_1_2	Unknown	1	dnmt1	Test	10.3340403772216	50.6564285124444	1	Pass	0.00838036413701631
S27-A03	7_1_2	Unknown	1	Fgfr4	Test	11.1254014222925	48.3427391252533	0.97772387160695	Pass	0.00765676153628628
S27-A04	7_1_2	Unknown	1	jmjd6	Test	10.9210479451068	37.4850467620837	1	Pass	0.0067923511426121
S27-A05	7_1_2	Unknown	1	neil1	Test	11.6613501138327	17.4808653062735	1	Pass	0.0078521262809567
S27-A06	7_1_2	Unknown	1	tdg.1	Test	10.6876957353064	72.3394140759393	0.929638873168016	Pass	0.00651112676535075
S27-A07	7_1_2	Unknown	1	Fgf4	Test	13.2011901442182	190.544326339228	0.954812575357745	Pass	0.00585753619118968
S27-A08	7_1_2	Unknown	1	dnmt3aa	Test	11.3334388991229	30.5959373489792	0.997430791898517	Pass	0.00720457938855895
S27-A09	7_1_2	Unknown	1	foxo3a	Test	10.0774919105672	17.384491846067	0.893773901644437	Pass	0.00894309864058025
S27-A10	7_1_2	Unknown	1	kdm2aa	Test	10.7529923373435	24.454022119132	1	Pass	0.00799264174920814
S27-A11	7_1_2	Unknown	1	ogt.1	Test	12.4289784190624	10.105625055472	0.895033582015072	Pass	0.00580787823573391
S27-A12	7_1_2	Unknown	1	tert	Test	15.2623012376205	51.2005353249069	0.944871960761412	Pass	0.00846945269463405
S27-A13	7_1_2	Unknown	1	Aldh1a2	Test	11.1669892513012	57.9466772892668	0.938292129743126	Pass	0.00632939983004382
S27-A14	7_1_2	Unknown	1	dnmt3ab	Test	10.52653809068	23.5017533243976	1	Pass	0.00931843179675896
S27-A15	7_1_2	Unknown	1	gadd45aa	Test	9.82698125592873	195.256285901554	1	Pass	0.00880831281487657
S27-A16	7_1_2	Unknown	1	kdm4b/jmjd2b	Test	10.4776221713225	38.1841493759601	1	Pass	0.00927896985905001
S27-A17	7_1_2	Unknown	1	pou5f3	Test	16.1628096995179	-1	0.825146827829397	Pass	0.00450652254380955
S27-A18	7_1_2	Unknown	1	tet3	Test	10.8596146340026	24.4019500797141	1	Pass	0.00750583387196605
S27-A19	7_1_2	Unknown	1	Axin2	Test	11.6159905211273	19.9266521743806	0.987806793098214	Pass	0.00461906985014386
S27-A20	7_1_2	Unknown	1	dnmt3ba	Test	11.603663371435	57.7075939552697	1	Pass	0.00597259676966606
S27-A21	7_1_2	Unknown	1	gadd45ab	Test	10.0941544850099	44.5171511556958	0.979695941113344	Pass	0.00665105353454544
S27-A22	7_1_2	Unknown	1	lats1	Test	11.9170370202662	19.9502367420615	1	Pass	0.00662357811419632
S27-A23	7_1_2	Unknown	1	Rarab	Test	10.4768118881344	41.8171657069038	1	Pass	0.00787731352009684
S27-A24	7_1_2	Unknown	1	ved	Test	14.9883199488475	14.9997988478283	0.978951421982259	Pass	0.00621567465591404
S27-A25	7_1_2	Unknown	1	cdkn2c	Test	14.6217122664391	48.2535994004675	1	Pass	0.00783619584131053
S27-A26	7_1_2	Unknown	1	dnmt3bb.1	Test	10.8068681241896	215.78662350358	1	Pass	0.00423247310552466
S27-A27	7_1_2	Unknown	1	hdac1	Test	9.5070508871861	53.7650257740853	0.930700281835732	Pass	0.00482340564875717
S27-A28	7_1_2	Unknown	1	lin28a	Test	12.8404405542862	267.522567110547	1	Pass	0.00685732601660462
S27-A29	7_1_2	Unknown	1	Rpl13a1	Test	5.47549158400383	33.1860281596334	0.945804068212222	Pass	0.0103523231385501
S27-A30	7_1_2	Unknown	1	vent
S27-A31	7_1_2	Unknown	1	Crabp1b	Test	12.75874787599	57.2529234066483	1	Pass	0.00704322330326988
S27-A32	7_1_2	Unknown	1	Dusp6	Test	7.83150176604483	50.1660045083098	1	Pass	0.0114011679183338
S27-A33	7_1_2	Unknown	1	Ifg1rb	Test	11.0481115307859	26.3652035796207	1	Pass	0.00843121681178218
S27-A34	7_1_2	Unknown	1	mycb	Test	9.89639842098402	50.0257925224399	1	Pass	0.00834510025919904
S27-A35	7_1_2	Unknown	1	Rpl13a2	Test	5.08050705864758	36.0595049046323	0.840227516267747	Pass	0.00967061280246088
S27-A36	7_1_2	Unknown	1	vox	Test	16.3478576281674	21.5210344327706	1	Pass	0.00881965691216683
S27-A37	7_1_2	Unknown	1	Crabp2a	Test	11.0975815610806	54.5028384548736	1	Pass	0.00685417042127909
S27-A38	7_1_2	Unknown	1	ezh2	Test	11.868661628157	77.439556326038	1	Pass	0.00764759834232412
S27-A39	7_1_2	Unknown	1	Igf1	Test	15.2428022846539	23.9868689057857	1	Pass	0.0083332072578722
S27-A40	7_1_2	Unknown	1	mycla	Test	12.724963404265	41.3114074368719	1	Pass	0.0127686116084135
S27-A41	7_1_2	Unknown	1	sall4	Test	12.4090004296256	77.0225714463726	0.918651736046532	Pass	0.00681715441030155
S27-A42	7_1_2	Unknown	1	xpc	Test	11.92052062756	23.1139433999921	1	Pass	0.00548824355156608
S27-A43	7_1_2	Unknown	1	Cyp26a1	Test	12.0519020362456	85.8531221813844	0.998777056853033	Pass	0.00883074677869744
S27-A44	7_1_2	Unknown	1	Fgf8a
S27-A45	7_1_2	Unknown	1	Igf1ra	Test	10.3780983950621	35.8911919472746	0.976212907072222	Pass	0.00648470647509694
S27-A46	7_1_2	Unknown	1	nanog	Test	15.4055940192476	0.0547841516102079	0.984444434888229	Pass	0.0080293555926136
S27-A47	7_1_2	Unknown	1	spop	Test	10.8178146610208	30.0124972133472	1	Pass	0.00683061453397148
S27-A48	7_1_2	Unknown	1	yap1	Test	9.76877101360703	78.5842816801785	0.896894145169054	Pass	0.00384749366749803
S33-A01	7_1_3	Unknown	1	actb1	Test	4.97433394681753	199.575768107696	0.991444648939175	Pass	0.00515123486432751
S33-A02	7_1_3	Unknown	1	dnmt1	Test	9.08707731331089	101.676760731812	1	Pass	0.00838036413701631
S33-A03	7_1_3	Unknown	1	Fgfr4	Test	11.1752692311207	46.9768989514617	0.968291979857562	Pass	0.00765676153628628
S33-A04	7_1_3	Unknown	1	jmjd6	Test	9.87277258339916	67.870900372017	1	Pass	0.0067923511426121
S33-A05	7_1_3	Unknown	1	neil1	Test	10.3051678628986	46.9293266190348	1	Pass	0.0078521262809567
S33-A06	7_1_3	Unknown	1	tdg.1	Test	10.4902891500296	84.5011706577008	0.902093932557953	Pass	0.00651112676535075
S33-A07	7_1_3	Unknown	1	Fgf4	Test	13.0928004463143	212.555567659314	0.950436958997403	Pass	0.00585753619118968
S33-A08	7_1_3	Unknown	1	dnmt3aa	Test	10.9235471373048	38.9145918449349	1	Pass	0.00720457938855895
S33-A09	7_1_3	Unknown	1	foxo3a	Test	10.0539236352286	17.6816112991141	0.914719268580918	Pass	0.00894309864058025
S33-A10	7_1_3	Unknown	1	kdm2aa	Test	9.82808861988174	46.8578006275853	1	Pass	0.00799264174920814
S33-A11	7_1_3	Unknown	1	ogt.1	Test	10.028180628194	45.844717252048	0.971392410895615	Pass	0.00580787823573391
S33-A12	7_1_3	Unknown	1	tert	Test	12.9686408070671	359.990474188308	1	Pass	0.00846945269463405
S33-A13	7_1_3	Unknown	1	Aldh1a2	Test	9.89939944656759	146.34589409014	1	Pass	0.00632939983004382
S33-A14	7_1_3	Unknown	1	dnmt3ab	Test	9.76141924570369	41.1572676474208	1	Pass	0.00931843179675896
S33-A15	7_1_3	Unknown	1	gadd45aa	Test	10.4629962441318	118.220553772023	1	Pass	0.00880831281487657
S33-A16	7_1_3	Unknown	1	kdm4b/jmjd2b	Test	10.7638581188024	31.7821373249566	1	Pass	0.00927896985905001
S33-A17	7_1_3	Unknown	1	pou5f3	Test	15.8019145108967	-1	0.901762376620684	Pass	0.00450652254380955
S33-A18	7_1_3	Unknown	1	tet3	Test	10.377038560388	34.0640622702563	1	Pass	0.00750583387196605
S33-A19	7_1_3	Unknown	1	Axin2	Test	9.84966241547677	50.9499769879775	1	Pass	0.00461906985014386
S33-A20	7_1_3	Unknown	1	dnmt3ba	Test	11.2165490403649	74.743579281322	0.96668650816669	Pass	0.00597259676966606
S33-A21	7_1_3	Unknown	1	gadd45ab	Test	10.1405607399145	42.8695903660102	0.99266818962016	Pass	0.00665105353454544
S33-A22	7_1_3	Unknown	1	lats1	Test	11.0709565367722	34.5432888923602	0.99217690754854	Pass	0.00662357811419632
S33-A23	7_1_3	Unknown	1	Rarab	Test	10.7797328035537	33.4697731957823	1	Pass	0.00787731352009684
S33-A24	7_1_3	Unknown	1	ved	Test	13.3847375171793	45.7451915008289	0.915097774133742	Pass	0.00621567465591404
S33-A25	7_1_3	Unknown	1	cdkn2c	Test	12.734004548415	215.019870735114	1	Pass	0.00783619584131053
S33-A26	7_1_3	Unknown	1	dnmt3bb.1	Test	11.2533463250848	152.533428043605	0.967627999356	Pass	0.00423247310552466
S33-A27	7_1_3	Unknown	1	hdac1	Test	8.9778931211292	75.7534636506161	0.986115818185071	Pass	0.00482340564875717
S33-A28	7_1_3	Unknown	1	lin28a	Test	14.1532437723805	86.5106686605786	1	Pass	0.00685732601660462
S33-A29	7_1_3	Unknown	1	Rpl13a1	Test	4.76665683957301	56.8663846419263	0.922218946524338	Pass	0.0103523231385501
S33-A30	7_1_3	Unknown	1	vent
S33-A31	7_1_3	Unknown	1	Crabp1b	Test	11.4401637795255	126.763946184585	0.985350851422964	Pass	0.00704322330326988
S33-A32	7_1_3	Unknown	1	Dusp6	Test	7.84881554306439	49.5434138154922	1	Pass	0.0114011679183338
S33-A33	7_1_3	Unknown	1	Ifg1rb	Test	10.7144144383577	33.4076180883572	1	Pass	0.00843121681178218
S33-A34	7_1_3	Unknown	1	mycb	Test	9.77056852976214	54.8898415515698	1	Pass	0.00834510025919904
S33-A35	7_1_3	Unknown	1	Rpl13a2	Test	4.60063004934514	52.2368648545818	0.83972122995176	Pass	0.00967061280246088
S33-A36	7_1_3	Unknown	1	vox	Test	16.5634704250611	18.0814709682731	1	Pass	0.00881965691216683
S33-A37	7_1_3	Unknown	1	Crabp2a	Test	10.6782108883507	70.98868774952	1	Pass	0.00685417042127909
S33-A38	7_1_3	Unknown	1	ezh2	Test	11.1762192821689	123.26261934457	1	Pass	0.00764759834232412
S33-A39	7_1_3	Unknown	1	Igf1	Test	15.1950332166209	24.779671275508	1	Pass	0.0083332072578722
S33-A40	7_1_3	Unknown	1	mycla	Test	11.7676707105057	77.4261751567219	1	Pass	0.0127686116084135
S33-A41	7_1_3	Unknown	1	sall4	Test	12.9738238725835	55.4329840304759	1	Pass	0.00681715441030155
S33-A42	7_1_3	Unknown	1	xpc	Test	11.7191371959348	26.6215259284919	1	Pass	0.00548824355156608
S33-A43	7_1_3	Unknown	1	Cyp26a1	Test	11.0746484735764	174.734336502667	1	Pass	0.00883074677869744
S33-A44	7_1_3	Unknown	1	Fgf8a
S33-A45	7_1_3	Unknown	1	Igf1ra	Test	10.1503767512399	42.5031496955076	0.948502931474902	Pass	0.00648470647509694
S33-A46	7_1_3	Unknown	1	nanog	Test	20.4821705257351	543255.290687062	1	Pass	0.0080293555926136
S33-A47	7_1_3	Unknown	1	spop	Test	10.6025761447267	35.1826486694518	0.989531241642381	Pass	0.00683061453397148
S33-A48	7_1_3	Unknown	1	yap1	Test	9.28755445463574	111.265384123809	0.875966725249561	Pass	0.00384749366749803
S39-A01	7_1_4	Unknown	1	actb1	Test	4.75702903899887	232.668229709547	0.870518044281936	Pass	0.00515123486432751
S39-A02	7_1_4	Unknown	1	dnmt1	Test	10.0452225459153	59.5276705957535	0.991562237193946	Pass	0.00838036413701631
S39-A03	7_1_4	Unknown	1	Fgfr4	Test	10.3053859171185	77.4471698545586	1	Pass	0.00765676153628628
S39-A04	7_1_4	Unknown	1	jmjd6	Test	9.47406611140169	85.0641006824571	1	Pass	0.0067923511426121
S39-A05	7_1_4	Unknown	1	neil1	Test	11.1232124693044	25.866906676599	1	Pass	0.0078521262809567
S39-A06	7_1_4	Unknown	1	tdg.1	Test	10.2503909672884	102.065071005427	0.883528100586092	Pass	0.00651112676535075
S39-A07	7_1_4	Unknown	1	Fgf4	Test	12.2557841131048	494.423783221089	0.947139540826627	Pass	0.00585753619118968
S39-A08	7_1_4	Unknown	1	dnmt3aa	Test	11.2084808227793	32.9234706079745	0.999244030048031	Pass	0.00720457938855895
S39-A09	7_1_4	Unknown	1	foxo3a	Test	10.6518525582415	11.5027632843344	1	Pass	0.00894309864058025
S39-A10	7_1_4	Unknown	1	kdm2aa	Test	10.2845176713874	33.9942328127895	1	Pass	0.00799264174920814
S39-A11	7_1_4	Unknown	1	ogt.1	Test	11.215391948581	21.7036928288475	0.920531608271842	Pass	0.00580787823573391
S39-A12	7_1_4	Unknown	1	tert	Test	13.5059837225676	227.959573032152	0.987812159738983	Pass	0.00846945269463405
S39-A13	7_1_4	Unknown	1	Aldh1a2	Test	10.2821913838723	110.630950491714	0.963847358950903	Pass	0.00632939983004382
S39-A14	7_1_4	Unknown	1	dnmt3ab	Test	9.86266717572449	38.2159448406484	1	Pass	0.00931843179675896
S39-A15	7_1_4	Unknown	1	gadd45aa	Test	10.3991407989737	124.328644898627	1	Pass	0.00880831281487657
S39-A16	7_1_4	Unknown	1	kdm4b/jmjd2b	Test	9.97844677724589	52.5865113085701	1	Pass	0.00927896985905001
S39-A17	7_1_4	Unknown	1	pou5f3	Test	15.9051476916274	-1	0.903314109815476	Pass	0.00450652254380955
S39-A18	7_1_4	Unknown	1	tet3	Test	9.55788191227489	60.008340962803	1	Pass	0.00750583387196605
S39-A19	7_1_4	Unknown	1	Axin2	Test	10.769487731011	31.2483358124293	0.963726487636667	Pass	0.00461906985014386
S39-A20	7_1_4	Unknown	1	dnmt3ba	Test	11.196705951105	75.7412334706041	0.976101345196075	Pass	0.00597259676966606
S39-A21	7_1_4	Unknown	1	gadd45ab	Test	9.62788796542484	65.0257709908571	1	Pass	0.00665105353454544
S39-A22	7_1_4	Unknown	1	lats1	Test	11.608457389149	24.3726191133573	1	Pass	0.00662357811419632
S39-A23	7_1_4	Unknown	1	Rarab	Test	10.0743500146588	56.2125132838334	0.960816983044493	Pass	0.00787731352009684
S39-A24	7_1_4	Unknown	1	ved	Test	13.8851147481473	32.3026649949653	0.929492614759635	Pass	0.00621567465591404
S39-A25	7_1_4	Unknown	1	cdkn2c	Test	14.9061275491817	38.5260536369029	1	Pass	0.00783619584131053
S39-A26	7_1_4	Unknown	1	dnmt3bb.1	Test	10.9396694375421	194.631028952545	1	Pass	0.00423247310552466
S39-A27	7_1_4	Unknown	1	hdac1	Test	8.81796006258417	84.0246949465868	0.990696205777652	Pass	0.00482340564875717
S39-A28	7_1_4	Unknown	1	lin28a	Test	11.7205683587741	700.805501475498	1	Pass	0.00685732601660462
S39-A29	7_1_4	Unknown	1	Rpl13a1	Test	4.95976370357323	49.1059902843326	0.986587901191078	Pass	0.0103523231385501
S39-A30	7_1_4	Unknown	1	vent
S39-A31	7_1_4	Unknown	1	Crabp1b	Test	11.6610902241555	110.957948662549	1	Pass	0.00704322330326988
S39-A32	7_1_4	Unknown	1	Dusp6	Test	7.02894681148886	89.4976999462007	0.978422191374419	Pass	0.0114011679183338
S39-A33	7_1_4	Unknown	1	Ifg1rb	Test	10.1836472847803	48.6831358364454	1	Pass	0.00843121681178218
S39-A34	7_1_4	Unknown	1	mycb	Test	9.24297892983454	80.9947077020577	1	Pass	0.00834510025919904
S39-A35	7_1_4	Unknown	1	Rpl13a2	Test	4.83098040476114	43.7234506021103	0.943660134920381	Pass	0.00967061280246088
S39-A36	7_1_4	Unknown	1	vox	Test	16.9840420034365	12.8739567067338	1	Pass	0.00881965691216683
S39-A37	7_1_4	Unknown	1	Crabp2a	Test	10.9520631746354	59.7370035399438	1	Pass	0.00685417042127909
S39-A38	7_1_4	Unknown	1	ezh2	Test	11.5217820639284	97.7437654816053	1	Pass	0.00764759834232412
S39-A39	7_1_4	Unknown	1	Igf1	Test	13.722836762407	67.5027201285882	1	Pass	0.0083332072578722
S39-A40	7_1_4	Unknown	1	mycla	Test	12.3801431369497	51.8012152145526	1	Pass	0.0127686116084135
S39-A41	7_1_4	Unknown	1	sall4	Test	11.0779702309256	167.205081308306	0.891452334553663	Pass	0.00681715441030155
S39-A42	7_1_4	Unknown	1	xpc	Test	11.9226434498304	23.0795453487946	0.989640077976798	Pass	0.00548824355156608
S39-A43	7_1_4	Unknown	1	Cyp26a1	Test	12.4676974540088	63.4520366275317	1	Pass	0.00883074677869744
S39-A44	7_1_4	Unknown	1	Fgf8a
S39-A45	7_1_4	Unknown	1	Igf1ra	Test	9.89055963820964	51.5470896947096	1	Pass	0.00648470647509694
S39-A46	7_1_4	Unknown	1	nanog	Test	15.0064626213624	0.0154378524342221	0.942872088832913	Pass	0.0080293555926136
S39-A47	7_1_4	Unknown	1	spop	Test	10.5210775086152	37.3649942218344	0.95586778753066	Pass	0.00683061453397148
S39-A48	7_1_4	Unknown	1	yap1	Test	9.44094457455314	99.5910507101432	0.901319250669481	Pass	0.00384749366749803
S45-A01	7_1_5	Unknown	1	actb1	Test	5.7128342114553	118.487196374515	0.942535949155696	Pass	0.00515123486432751
S45-A02	7_1_5	Unknown	1	dnmt1	Test	9.16011114870423	97.611135593425	1	Pass	0.00838036413701631
S45-A03	7_1_5	Unknown	1	Fgfr4	Test	10.8440740824877	56.8263836117331	1	Pass	0.00765676153628628
S45-A04	7_1_5	Unknown	1	jmjd6	Test	10.8402937280816	39.2391623957769	1	Pass	0.0067923511426121
S45-A05	7_1_5	Unknown	1	neil1	Test	10.8964943427087	30.5100011917637	1	Pass	0.0078521262809567
S45-A06	7_1_5	Unknown	1	tdg.1	Test	9.76179443901063	149.938962751446	0.931471616630283	Pass	0.00651112676535075
S45-A07	7_1_5	Unknown	1	Fgf4	Test	11.9529559901524	671.03169373491	1	Pass	0.00585753619118968
S45-A08	7_1_5	Unknown	1	dnmt3aa	Test	10.3360655349683	54.9306429185709	1	Pass	0.00720457938855895
S45-A09	7_1_5	Unknown	1	foxo3a	Test	8.77972558924249	44.2002801379344	1	Pass	0.00894309864058025
S45-A10	7_1_5	Unknown	1	kdm2aa	Test	9.79898262937633	47.8266321514204	1	Pass	0.00799264174920814
S45-A11	7_1_5	Unknown	1	ogt.1	Test	11.234383041993	21.4456254392888	0.937009391510468	Pass	0.00580787823573391
S45-A12	7_1_5	Unknown	1	tert	Test	13.240626822684	285.660638341794	0.977802403333849	Pass	0.00846945269463405
S45-A13	7_1_5	Unknown	1	Aldh1a2	Test	10.3642031534341	104.194520100935	0.979292136543966	Pass	0.00632939983004382
S45-A14	7_1_5	Unknown	1	dnmt3ab	Test	9.23999142265059	60.2957645041136	1	Pass	0.00931843179675896
S45-A15	7_1_5	Unknown	1	gadd45aa	Test	10.7836878560588	91.7946429898552	1	Pass	0.00880831281487657
S45-A16	7_1_5	Unknown	1	kdm4b/jmjd2b	Test	10.8793280644691	29.5142297185362	1	Pass	0.00927896985905001
S45-A17	7_1_5	Unknown	1	pou5f3	Test	18.9434203534043	-1	0.965297468625769	Pass	0.00450652254380955
S45-A18	7_1_5	Unknown	1	tet3	Test	9.86730922408555	48.4529133879092	1	Pass	0.00750583387196605
S45-A19	7_1_5	Unknown	1	Axin2	Test	9.96607048932703	47.8932488403941	1	Pass	0.00461906985014386
S45-A20	7_1_5	Unknown	1	dnmt3ba	Test	10.3990962478735	129.062305941787	0.993109812299073	Pass	0.00597259676966606
S45-A21	7_1_5	Unknown	1	gadd45ab	Test	10.4259115653281	33.9970520742865	1	Pass	0.00665105353454544
S45-A22	7_1_5	Unknown	1	lats1	Test	10.4824904738562	50.6042008627603	1	Pass	0.00662357811419632
S45-A23	7_1_5	Unknown	1	Rarab	Test	9.86852568039214	65.3940995334022	1	Pass	0.00787731352009684
S45-A24	7_1_5	Unknown	1	ved	Test	14.2706178200259	24.7070950259811	0.885488780845736	Pass	0.00621567465591404
S45-A25	7_1_5	Unknown	1	cdkn2c	Test	13.3317928098651	133.959418122912	1	Pass	0.00783619584131053
S45-A26	7_1_5	Unknown	1	dnmt3bb.1	Test	10.9953558632224	186.389423699101	1	Pass	0.00423247310552466
S45-A27	7_1_5	Unknown	1	hdac1	Test	8.76509795051264	86.9525068165848	1	Pass	0.00482340564875717
S45-A28	7_1_5	Unknown	1	lin28a	Test	14.9605704432421	43.207438750263	1	Pass	0.00685732601660462
S45-A29	7_1_5	Unknown	1	Rpl13a1	Test	5.34258837823503	36.7122075078319	0.958693461720985	Pass	0.0103523231385501
S45-A30	7_1_5	Unknown	1	vent
S45-A31	7_1_5	Unknown	1	Crabp1b	Test	11.478517190225	123.866834162437	1	Pass	0.00704322330326988
S45-A32	7_1_5	Unknown	1	Dusp6	Test	7.80928610379713	50.9763369766653	1	Pass	0.0114011679183338
S45-A33	7_1_5	Unknown	1	Ifg1rb	Test	10.5719045286306	36.9618586161636	1	Pass	0.00843121681178218
S45-A34	7_1_5	Unknown	1	mycb	Test	9.66298775393879	59.4217661370415	1	Pass	0.00834510025919904
S45-A35	7_1_5	Unknown	1	Rpl13a2	Test	4.72635583788708	47.403122078606	0.908785279295695	Pass	0.00967061280246088
S45-A36	7_1_5	Unknown	1	vox	Test	16.9544566933972	13.1852852663992	1	Pass	0.00881965691216683
S45-A37	7_1_5	Unknown	1	Crabp2a	Test	9.44198664825124	154.706712767976	1	Pass	0.00685417042127909
S45-A38	7_1_5	Unknown	1	ezh2	Test	10.6456693545953	175.996179476064	1	Pass	0.00764759834232412
S45-A39	7_1_5	Unknown	1	Igf1	Test	13.2883957987855	90.7308841442128	1	Pass	0.0083332072578722
S45-A40	7_1_5	Unknown	1	mycla	Test	11.2101795467907	111.626321263641	1	Pass	0.0127686116084135
S45-A41	7_1_5	Unknown	1	sall4	Test	12.8919646699115	58.1395018499357	1	Pass	0.00681715441030155
S45-A42	7_1_5	Unknown	1	xpc	Test	11.9364361123122	22.8572935184221	1	Pass	0.00548824355156608
S45-A43	7_1_5	Unknown	1	Cyp26a1	Test	10.8550683956569	204.985374940364	1	Pass	0.00883074677869744
S45-A44	7_1_5	Unknown	1	Fgf8a
S45-A45	7_1_5	Unknown	1	Igf1ra	Test	10.1516430420742	42.4632054288358	0.974314773275178	Pass	0.00648470647509694
S45-A46	7_1_5	Unknown	1	nanog	Test	18.2503548958486	456.245536991622	0.98961567235035	Pass	0.0080293555926136
S45-A47	7_1_5	Unknown	1	spop	Test	9.61813932618465	72.7837964958054	0.995632464202181	Pass	0.00683061453397148
S45-A48	7_1_5	Unknown	1	yap1	Test	9.27682568246714	112.131382209928	0.900811902619659	Pass	0.00384749366749803
S21-A01	7_1_L	Unknown	1	actb1	Test	5.62642161717027	125.940946504652	0.931303813007005	Pass	0.00515123486432751
S21-A02	7_1_L	Unknown	1	dnmt1	Test	9.66271685678806	73.7118711798096	1	Pass	0.00838036413701631
S21-A03	7_1_L	Unknown	1	Fgfr4	Test	10.6803743572395	62.432274370798	1	Pass	0.00765676153628628
S21-A04	7_1_L	Unknown	1	jmjd6	Test	9.7133487468381	74.2838222387627	1	Pass	0.0067923511426121
S21-A05	7_1_L	Unknown	1	neil1	Test	9.54589935287836	81.5749273609148	1	Pass	0.0078521262809567
S21-A06	7_1_L	Unknown	1	tdg.1	Test	10.2603028848681	101.27180187731	0.89298797718014	Pass	0.00651112676535075
S21-A07	7_1_L	Unknown	1	Fgf4	Test	12.6782154072854	322.899613519171	1	Pass	0.00585753619118968
S21-A08	7_1_L	Unknown	1	dnmt3aa	Test	9.89151403923142	71.3009638274497	1	Pass	0.00720457938855895
S21-A09	7_1_L	Unknown	1	foxo3a	Test	8.19413727257912	67.3427716244773	0.955172210553881	Pass	0.00894309864058025
S21-A10	7_1_L	Unknown	1	kdm2aa	Test	8.88525695459299	90.9259895059418	1	Pass	0.00799264174920814
S21-A11	7_1_L	Unknown	1	ogt.1	Test	8.79181522314867	99.8828244369756	1	Pass	0.00580787823573391
S21-A12	7_1_L	Unknown	1	tert	Test	13.5027542074087	228.586432293406	0.999773313885107	Pass	0.00846945269463405
S21-A13	7_1_L	Unknown	1	Aldh1a2	Test	10.6705778238146	83.2907870739785	1	Pass	0.00632939983004382
S21-A14	7_1_L	Unknown	1	dnmt3ab	Test	9.16761983054485	63.5776706136041	1	Pass	0.00931843179675896
S21-A15	7_1_L	Unknown	1	gadd45aa	Test	9.98108440913524	172.904406426939	1	Pass	0.00880831281487657
S21-A16	7_1_L	Unknown	1	kdm4b/jmjd2b	Test	9.18302196350877	87.5696850868115	1	Pass	0.00927896985905001
S21-A17	7_1_L	Unknown	1	pou5f3	Test	17.9604099310009	-1	0.959893731534593	Pass	0.00450652254380955
S21-A18	7_1_L	Unknown	1	tet3	Test	9.21088328719819	76.2750415159536	1	Pass	0.00750583387196605
S21-A19	7_1_L	Unknown	1	Axin2	Test	9.07321319134912	76.9779872058768	1	Pass	0.00461906985014386
S21-A20	7_1_L	Unknown	1	dnmt3ba	Test	11.0694486284403	82.4636515839303	0.955554179499309	Pass	0.00597259676966606
S21-A21	7_1_L	Unknown	1	gadd45ab	Test	9.19802259694069	92.2139656478788	1	Pass	0.00665105353454544
S21-A22	7_1_L	Unknown	1	lats1	Test	9.82382978260546	77.5870940769294	1	Pass	0.00662357811419632
S21-A23	7_1_L	Unknown	1	Rarab	Test	9.51214718614486	84.9778459784751	1	Pass	0.00787731352009684
S21-A24	7_1_L	Unknown	1	ved	Test	12.8741572003845	65.2429724684756	0.965286521862501	Pass	0.00621567465591404
S21-A25	7_1_L	Unknown	1	cdkn2c	Test	13.3467864883358	132.378904708377	0.98221792435816	Pass	0.00783619584131053
S21-A26	7_1_L	Unknown	1	dnmt3bb.1	Test	10.804486850884	216.186243776148	1	Pass	0.00423247310552466
S21-A27	7_1_L	Unknown	1	hdac1	Test	8.9887663906432	75.2216412786569	1	Pass	0.00482340564875717
S21-A28	7_1_L	Unknown	1	lin28a	Test	13.7958065544574	117.641685775366	1	Pass	0.00685732601660462
S21-A29	7_1_L	Unknown	1	Rpl13a1	Test	4.56191245033418	66.4380531878277	0.853567523852714	Pass	0.0103523231385501
S21-A30	7_1_L	Unknown	1	vent
S21-A31	7_1_L	Unknown	1	Crabp1b	Test	12.0606720017668	87.206750015943	0.948463618932964	Pass	0.00704322330326988
S21-A32	7_1_L	Unknown	1	Dusp6	Test	7.18911775838296	79.7329663385115	1	Pass	0.0114011679183338
S21-A33	7_1_L	Unknown	1	Ifg1rb	Test	9.43512457064488	82.7948973833955	1	Pass	0.00843121681178218
S21-A34	7_1_L	Unknown	1	mycb	Test	9.34146045569896	75.3211893768329	1	Pass	0.00834510025919904
S21-A35	7_1_L	Unknown	1	Rpl13a2	Test	4.19219512561577	71.6096894459964	0.655242383173264	Pass	0.00967061280246088
S21-A36	7_1_L	Unknown	1	vox	Test	14.9389569970373	67.1515310421946	1	Pass	0.00881965691216683
S21-A37	7_1_L	Unknown	1	Crabp2a	Test	10.2364535725512	93.7747195767937	1	Pass	0.00685417042127909
S21-A38	7_1_L	Unknown	1	ezh2	Test	11.6640082851768	88.8435057214849	1	Pass	0.00764759834232412
S21-A39	7_1_L	Unknown	1	Igf1	Test	13.3363135661625	87.8191448483188	1	Pass	0.0083332072578722
S21-A40	7_1_L	Unknown	1	mycla	Test	12.2005788927829	58.2792251185983	0.997509959705647	Pass	0.0127686116084135
S21-A41	7_1_L	Unknown	1	sall4	Test	12.5365383793836	71.5092679919436	0.967625258812546	Pass	0.00681715441030155
S21-A42	7_1_L	Unknown	1	xpc	Test	9.78874442906525	103.133176513694	1	Pass	0.00548824355156608
S21-A43	7_1_L	Unknown	1	Cyp26a1	Test	12.4642479503938	63.6113977962071	1	Pass	0.00883074677869744
S21-A44	7_1_L	Unknown	1	Fgf8a
S21-A45	7_1_L	Unknown	1	Igf1ra	Test	9.07230369165089	94.6382173981608	0.94639613728681	Pass	0.00648470647509694
S21-A46	7_1_L	Unknown	1	nanog	Test	17.065880238248	10.6365231067809	0.950730603082884	Pass	0.0080293555926136
S21-A47	7_1_L	Unknown	1	spop	Test	9.40309603391036	85.3097159992019	0.973447115802821	Pass	0.00683061453397148
S21-A48	7_1_L	Unknown	1	yap1	Test	8.73348065131046	166.054205477549	0.947815939497755	Pass	0.00384749366749803
S15-A01	7_1_S	Unknown	1	actb1	Test	4.27435474505554	327.139511581187	0.660182808055619	Pass	0.00515123486432751
S15-A02	7_1_S	Unknown	1	dnmt1	Test	8.67246783476787	128.18302939741	1	Pass	0.00838036413701631
S15-A03	7_1_S	Unknown	1	Fgfr4	Test	10.1299814894235	85.6615958371727	1	Pass	0.00765676153628628
S15-A04	7_1_S	Unknown	1	jmjd6	Test	9.15337906668447	102.004651227769	1	Pass	0.0067923511426121
S15-A05	7_1_S	Unknown	1	neil1	Test	9.3707297294105	92.6728751869184	1	Pass	0.0078521262809567
S15-A06	7_1_S	Unknown	1	tdg.1	Test	9.42513882238289	195.437344849343	0.91768086009293	Pass	0.00651112676535075
S15-A07	7_1_S	Unknown	1	Fgf4	Test	11.9583983347948	667.358500756631	1	Pass	0.00585753619118968
S15-A08	7_1_S	Unknown	1	dnmt3aa	Test	9.71977100100573	78.8604049109244	1	Pass	0.00720457938855895
S15-A09	7_1_S	Unknown	1	foxo3a	Test	8.8969390177876	40.6276706923497	1	Pass	0.00894309864058025
S15-A10	7_1_S	Unknown	1	kdm2aa	Test	8.99885900099444	83.9456403988325	1	Pass	0.00799264174920814
S15-A11	7_1_S	Unknown	1	ogt.1	Test	9.26931245941088	73.9390482131905	1	Pass	0.00580787823573391
S15-A12	7_1_S	Unknown	1	tert	Test	12.6450362603886	474.016667104319	1	Pass	0.00846945269463405
S15-A13	7_1_S	Unknown	1	Aldh1a2	Test	8.88639917710934	306.847091987257	1	Pass	0.00632939983004382
S15-A14	7_1_S	Unknown	1	dnmt3ab	Test	8.8120663098578	82.4875705491482	1	Pass	0.00931843179675896
S15-A15	7_1_S	Unknown	1	gadd45aa	Test	8.84013665988095	425.322755281738	1	Pass	0.00880831281487657
S15-A16	7_1_S	Unknown	1	kdm4b/jmjd2b	Test	9.44255068006071	74.1464177828589	1	Pass	0.00927896985905001
S15-A17	7_1_S	Unknown	1	pou5f3	Test	14.5699022125646	-1	0.899098028469764	Pass	0.00450652254380955
S15-A18	7_1_S	Unknown	1	tet3	Test	9.28289251578812	72.5712994111302	1	Pass	0.00750583387196605
S15-A19	7_1_S	Unknown	1	Axin2	Test	9.39523092340077	64.8690236024709	1	Pass	0.00461906985014386
S15-A20	7_1_S	Unknown	1	dnmt3ba	Test	10.3454783836708	133.77019874749	1	Pass	0.00597259676966606
S15-A21	7_1_S	Unknown	1	gadd45ab	Test	8.98481377469224	109.658902716247	1	Pass	0.00665105353454544
S15-A22	7_1_S	Unknown	1	lats1	Test	10.3414608188602	55.4532604230222	1	Pass	0.00662357811419632
S15-A23	7_1_S	Unknown	1	Rarab	Test	9.52654291118967	84.0833784058677	1	Pass	0.00787731352009684
S15-A24	7_1_S	Unknown	1	ved	Test	13.0192188114973	58.9830345009855	0.884497075517125	Pass	0.00621567465591404
S15-A25	7_1_S	Unknown	1	cdkn2c	Test	13.0986126499559	161.114648770925	0.987464145052732	Pass	0.00783619584131053
S15-A26	7_1_S	Unknown	1	dnmt3bb.1	Test	9.67898743035576	518.341867965454	1	Pass	0.00423247310552466
S15-A27	7_1_S	Unknown	1	hdac1	Test	8.21268672492655	124.373588020561	0.97016697185644	Pass	0.00482340564875717
S15-A28	7_1_S	Unknown	1	lin28a	Test	12.072739386406	517.693472018362	1	Pass	0.00685732601660462
S15-A29	7_1_S	Unknown	1	Rpl13a1	Test	4.22793191377443	85.6294882872942	0.700014059371033	Pass	0.0103523231385501
S15-A30	7_1_S	Unknown	1	vent
S15-A31	7_1_S	Unknown	1	Crabp1b	Test	10.5911772602171	211.473407857367	1	Pass	0.00704322330326988
S15-A32	7_1_S	Unknown	1	Dusp6	Test	6.56800209031203	124.796949427599	1	Pass	0.0114011679183338
S15-A33	7_1_S	Unknown	1	Ifg1rb	Test	9.24183027256315	94.9639745391455	1	Pass	0.00843121681178218
S15-A34	7_1_S	Unknown	1	mycb	Test	9.07391386615019	91.7489370843823	1	Pass	0.00834510025919904
S15-A35	7_1_S	Unknown	1	Rpl13a2	Test	4.04493712704798	80.2350535558783	0.604058478954569	Fail	0.00967061280246088
S15-A36	7_1_S	Unknown	1	vox	Test	15.2526316415466	52.1230581573131	1	Pass	0.00881965691216683
S15-A37	7_1_S	Unknown	1	Crabp2a	Test	10.0569617461144	105.004441292272	1	Pass	0.00685417042127909
S15-A38	7_1_S	Unknown	1	ezh2	Test	10.3287520630299	217.718088725585	1	Pass	0.00764759834232412
S15-A39	7_1_S	Unknown	1	Igf1	Test	13.727577809331	67.2852200569615	1	Pass	0.0083332072578722
S15-A40	7_1_S	Unknown	1	mycla	Test	11.2803990139188	106.599420086969	1	Pass	0.0127686116084135
S15-A41	7_1_S	Unknown	1	sall4	Test	10.8437758309599	191.637141591816	0.998147394887594	Pass	0.00681715441030155
S15-A42	7_1_S	Unknown	1	xpc	Test	9.26393676839872	149.039172328516	0.973355264532051	Pass	0.00548824355156608
S15-A43	7_1_S	Unknown	1	Cyp26a1	Test	10.3954491350832	286.334197306846	1	Pass	0.00883074677869744
S15-A44	7_1_S	Unknown	1	Fgf8a
S15-A45	7_1_S	Unknown	1	Igf1ra	Test	8.68143771843088	126.505328267311	1	Pass	0.00648470647509694
S15-A46	7_1_S	Unknown	1	nanog	Test	15.5642021691004	0.0906239101064223	1	Pass	0.0080293555926136
S15-A47	7_1_S	Unknown	1	spop	Test	9.33038554022271	90.0153451448538	0.96775999444433	Pass	0.00683061453397148
S15-A48	7_1_S	Unknown	1	yap1	Test	8.13597911470448	255.722528621331	0.905029354879935	Pass	0.00384749366749803
S16-A01	7_2_1	Unknown	1	actb1	Test	8.19946933329352	20.4751927790821	0.798406526909008	Pass	0.00515123486432751
S16-A02	7_2_1	Unknown	1	dnmt1	Test	12.134868526531	18.5202540668177	1	Pass	0.00838036413701631
S16-A03	7_2_1	Unknown	1	Fgfr4	Test	13.9794561660962	9.37485722118682	1	Pass	0.00765676153628628
S16-A04	7_2_1	Unknown	1	jmjd6	Test	13.430611884978	9.04951847911564	1	Pass	0.0067923511426121
S16-A05	7_2_1	Unknown	1	neil1	Test	13.5894107031344	4.29368070891016	1	Pass	0.0078521262809567
S16-A06	7_2_1	Unknown	1	tdg.1	Test	13.2046805324403	9.97444955409895	0.878436807769247	Pass	0.00651112676535075
S16-A07	7_2_1	Unknown	1	Fgf4	Test	17.4714253352769	2.56781092398475	0.976005757124595	Pass	0.00585753619118968
S16-A08	7_2_1	Unknown	1	dnmt3aa	Test	13.6789691302042	7.72636442761728	1	Pass	0.00720457938855895
S16-A09	7_2_1	Unknown	1	foxo3a	Test	12.5348671985232	2.97015675190125	1	Pass	0.00894309864058025
S16-A10	7_2_1	Unknown	1	kdm2aa	Test	12.9285740919515	5.29672711277394	1	Pass	0.00799264174920814
S16-A11	7_2_1	Unknown	1	ogt.1	Test	12.8247246946219	7.8760558044185	1	Pass	0.00580787823573391
S16-A12	7_2_1	Unknown	1	tert	Test	15.7214928170964	34.6498625259353	1	Pass	0.00846945269463405
S16-A13	7_2_1	Unknown	1	Aldh1a2	Test	12.7095102967305	18.7676215525935	0.990480810921956	Pass	0.00632939983004382
S16-A14	7_2_1	Unknown	1	dnmt3ab	Test	12.3121531142379	6.35601458752875	0.999841056755086	Pass	0.00931843179675896
S16-A15	7_2_1	Unknown	1	gadd45aa	Test	12.6676494217224	20.7650369906499	1	Pass	0.00880831281487657
S16-A16	7_2_1	Unknown	1	kdm4b/jmjd2b	Test	13.0994022485288	7.11001061511233	1	Pass	0.00927896985905001
S16-A17	7_2_1	Unknown	1	pou5f3	Test	20.3113787004921	-1	0.861639054076871	Pass	0.00450652254380955
S16-A18	7_2_1	Unknown	1	tet3	Test	12.8013713676101	6.37527373088063	1	Pass	0.00750583387196605
S16-A19	7_2_1	Unknown	1	Axin2	Test	13.812455073589	6.20067803152656	0.993589057066523	Pass	0.00461906985014386
S16-A20	7_2_1	Unknown	1	dnmt3ba	Test	13.6724490225812	14.4833667224858	1	Pass	0.00597259676966606
S16-A21	7_2_1	Unknown	1	gadd45ab	Test	13.2053130331215	3.55234248791118	0.99030786409937	Pass	0.00665105353454544
S16-A22	7_2_1	Unknown	1	lats1	Test	14.7356566187878	3.20400999577477	1	Pass	0.00662357811419632
S16-A23	7_2_1	Unknown	1	Rarab	Test	13.4489114722423	4.7050853947482	1	Pass	0.00787731352009684
S16-A24	7_2_1	Unknown	1	ved	Test	16.8710324629701	4.05071738322532	0.958492138872446	Pass	0.00621567465591404
S16-A25	7_2_1	Unknown	1	cdkn2c	Test	16.7020380810761	9.29743874307768	1	Pass	0.00783619584131053
S16-A26	7_2_1	Unknown	1	dnmt3bb.1	Test	14.2814333017209	14.5066837548254	0.965439311452361	Pass	0.00423247310552466
S16-A27	7_2_1	Unknown	1	hdac1	Test	11.9414083730423	11.1040782635854	1	Pass	0.00482340564875717
S16-A28	7_2_1	Unknown	1	lin28a	Test	16.5865762596084	10.6732440207842	1	Pass	0.00685732601660462
S16-A29	7_2_1	Unknown	1	Rpl13a1	Test	7.27676207997836	8.44450988319529	0.904431213142189	Pass	0.0103523231385501
S16-A30	7_2_1	Unknown	1	vent
S16-A31	7_2_1	Unknown	1	Crabp1b	Test	14.2972692611335	22.6475490190084	0.966164999850426	Pass	0.00704322330326988
S16-A32	7_2_1	Unknown	1	Dusp6	Test	10.0463226096132	10.1533955080019	0.974538402884665	Pass	0.0114011679183338
S16-A33	7_2_1	Unknown	1	Ifg1rb	Test	13.2717609624158	5.44389015003251	1	Pass	0.00843121681178218
S16-A34	7_2_1	Unknown	1	mycb	Test	12.5209816779479	7.22188907454039	1	Pass	0.00834510025919904
S16-A35	7_2_1	Unknown	1	Rpl13a2	Test	7.21910187566106	6.91362256614327	0.874121563803318	Pass	0.00967061280246088
S16-A36	7_2_1	Unknown	1	vox	Test	999	-1	0	Fail	0.00881965691216683
S16-A37	7_2_1	Unknown	1	Crabp2a	Test	13.8109177123113	9.85949973966001	1	Pass	0.00685417042127909
S16-A38	7_2_1	Unknown	1	ezh2	Test	13.2549568901814	30.5361695660735	1	Pass	0.00764759834232412
S16-A39	7_2_1	Unknown	1	Igf1	Test	17.9634348758092	3.76419751015181	1	Pass	0.0083332072578722
S16-A40	7_2_1	Unknown	1	mycla	Test	14.7910905779864	10.6474750634043	1	Pass	0.0127686116084135
S16-A41	7_2_1	Unknown	1	sall4	Test	16.3879519705748	7.59100986258017	0.90786879129393	Pass	0.00681715441030155
S16-A42	7_2_1	Unknown	1	xpc	Test	15.0615827002058	2.55172272023585	0.922900596984225	Pass	0.00548824355156608
S16-A43	7_2_1	Unknown	1	Cyp26a1	Test	14.494267496486	14.5359482825951	1	Pass	0.00883074677869744
S16-A44	7_2_1	Unknown	1	Fgf8a
S16-A45	7_2_1	Unknown	1	Igf1ra	Test	12.7957258024374	5.96179896001909	1	Pass	0.00648470647509694
S16-A46	7_2_1	Unknown	1	nanog	Test	18.9588045222748	4320.73437766572	1	Pass	0.0080293555926136
S16-A47	7_2_1	Unknown	1	spop	Test	13.0685243893692	5.69515735434545	0.88257085985105	Pass	0.00683061453397148
S16-A48	7_2_1	Unknown	1	yap1	Test	11.3843045207558	24.4522448965662	0.950649936404256	Pass	0.00384749366749803
S11-A01	7_2_10	Unknown	1	actb1	Test	6.28944251341943	78.8630898399162	0.826322752649925	Pass	0.00515123486432751
S11-A02	7_2_10	Unknown	1	dnmt1	Test	10.2507665787119	53.0691003484816	1	Pass	0.00838036413701631
S11-A03	7_2_10	Unknown	1	Fgfr4	Test	12.2285635727168	25.6439012882816	0.988594069446579	Pass	0.00765676153628628
S11-A04	7_2_10	Unknown	1	jmjd6	Test	11.9367578743513	21.0883227984373	1	Pass	0.0067923511426121
S11-A05	7_2_10	Unknown	1	neil1	Test	11.7055168108529	16.9276072715472	1	Pass	0.0078521262809567
S11-A06	7_2_10	Unknown	1	tdg.1	Test	11.7197462493803	32.1030319092534	0.93290896415998	Pass	0.00651112676535075
S11-A07	7_2_10	Unknown	1	Fgf4	Test	14.1231702983185	75.188878663508	0.944982301421688	Pass	0.00585753619118968
S11-A08	7_2_10	Unknown	1	dnmt3aa	Test	12.5222652353991	15.230941555574	1	Pass	0.00720457938855895
S11-A09	7_2_10	Unknown	1	foxo3a	Test	10.9191237187907	9.49160057815034	1	Pass	0.00894309864058025
S11-A10	7_2_10	Unknown	1	kdm2aa	Test	11.2350621042512	17.4238415443105	1	Pass	0.00799264174920814
S11-A11	7_2_10	Unknown	1	ogt.1	Test	12.0504596805793	12.8264086109901	0.968424808375484	Pass	0.00580787823573391
S11-A12	7_2_10	Unknown	1	tert	Test	14.9419612455286	67.2313065282633	1	Pass	0.00846945269463405
S11-A13	7_2_10	Unknown	1	Aldh1a2	Test	10.5981154410512	87.8208451999826	1	Pass	0.00632939983004382
S11-A14	7_2_10	Unknown	1	dnmt3ab	Test	11.3776018039524	12.6014117316757	1	Pass	0.00931843179675896
S11-A15	7_2_10	Unknown	1	gadd45aa	Test	11.4276349360651	55.2315971305906	1	Pass	0.00880831281487657
S11-A16	7_2_10	Unknown	1	kdm4b/jmjd2b	Test	11.1816960356398	24.3130590465052	1	Pass	0.00927896985905001
S11-A17	7_2_10	Unknown	1	pou5f3	Test	17.0598194038384	-1	0.811049216665204	Pass	0.00450652254380955
S11-A18	7_2_10	Unknown	1	tet3	Test	11.9195227158007	11.7282844771248	1	Pass	0.00750583387196605
S11-A19	7_2_10	Unknown	1	Axin2	Test	12.2687575531315	14.0851186850279	0.927506677421149	Pass	0.00461906985014386
S11-A20	7_2_10	Unknown	1	dnmt3ba	Test	12.7776588726692	26.3353094820857	1	Pass	0.00597259676966606
S11-A21	7_2_10	Unknown	1	gadd45ab	Test	11.286469993664	16.8937774093575	1	Pass	0.00665105353454544
S11-A22	7_2_10	Unknown	1	lats1	Test	12.9307385841504	10.3347209215473	1	Pass	0.00662357811419632
S11-A23	7_2_10	Unknown	1	Rarab	Test	11.3958758841065	21.2794618116943	1	Pass	0.00787731352009684
S11-A24	7_2_10	Unknown	1	ved	Test	15.7126103225726	9.06482917864096	0.918530627771254	Pass	0.00621567465591404
S11-A25	7_2_10	Unknown	1	cdkn2c	Test	14.9345086102339	37.6701884808222	1	Pass	0.00783619584131053
S11-A26	7_2_10	Unknown	1	dnmt3bb.1	Test	12.347728379445	65.1743986929068	0.970095549910121	Pass	0.00423247310552466
S11-A27	7_2_10	Unknown	1	hdac1	Test	10.0414693285007	38.0291738952634	0.902967475264668	Pass	0.00482340564875717
S11-A28	7_2_10	Unknown	1	lin28a	Test	13.7143099506035	126.182073631656	1	Pass	0.00685732601660462
S11-A29	7_2_10	Unknown	1	Rpl13a1	Test	6.04676136482017	21.5004940345423	0.885190008335036	Pass	0.0103523231385501
S11-A30	7_2_10	Unknown	1	vent
S11-A31	7_2_10	Unknown	1	Crabp1b	Test	13.5898772975612	34.690658514504	1	Pass	0.00704322330326988
S11-A32	7_2_10	Unknown	1	Dusp6	Test	7.90806841231321	47.4706106057561	1	Pass	0.0114011679183338
S11-A33	7_2_10	Unknown	1	Ifg1rb	Test	11.2024236500017	23.6312392660746	1	Pass	0.00843121681178218
S11-A34	7_2_10	Unknown	1	mycb	Test	10.4602788084678	33.0070647996794	1	Pass	0.00834510025919904
S11-A35	7_2_10	Unknown	1	Rpl13a2	Test	5.68072718634582	22.6828530756405	0.974522558945096	Pass	0.00967061280246088
S11-A36	7_2_10	Unknown	1	vox	Test	18.5367352617024	3.67351546680256	1	Pass	0.00881965691216683
S11-A37	7_2_10	Unknown	1	Crabp2a	Test	12.5087384311429	22.3988097320962	1	Pass	0.00685417042127909
S11-A38	7_2_10	Unknown	1	ezh2	Test	12.8513529743511	40.0384895665467	1	Pass	0.00764759834232412
S11-A39	7_2_10	Unknown	1	Igf1	Test	16.2612266465281	11.9921365019355	1	Pass	0.0083332072578722
S11-A40	7_2_10	Unknown	1	mycla	Test	13.1236857833079	31.8008354418316	0.970688880858144	Pass	0.0127686116084135
S11-A41	7_2_10	Unknown	1	sall4	Test	12.4522248170041	75.1079855583092	0.948527830252229	Pass	0.00681715441030155
S11-A42	7_2_10	Unknown	1	xpc	Test	12.9385245436283	11.3162245305145	1	Pass	0.00548824355156608
S11-A43	7_2_10	Unknown	1	Cyp26a1	Test	11.328068854174	145.327123078866	1	Pass	0.00883074677869744
S11-A44	7_2_10	Unknown	1	Fgf8a
S11-A45	7_2_10	Unknown	1	Igf1ra	Test	10.8096430871107	26.0512146933139	1	Pass	0.00648470647509694
S11-A46	7_2_10	Unknown	1	nanog	Test	18.6473026371918	1607.89339111125	1	Pass	0.0080293555926136
S11-A47	7_2_10	Unknown	1	spop	Test	11.4162903901077	19.2917940245815	0.956624116510123	Pass	0.00683061453397148
S11-A48	7_2_10	Unknown	1	yap1	Test	9.14166990968061	123.635812975351	0.953250647057164	Pass	0.00384749366749803
S28-A01	7_2_2	Unknown	1	actb1	Test	6.77957352529071	55.7945167249651	0.914230454342406	Pass	0.00515123486432751
S28-A02	7_2_2	Unknown	1	dnmt1	Test	12.5382646220028	14.7828830796582	1	Pass	0.00838036413701631
S28-A03	7_2_2	Unknown	1	Fgfr4	Test	13.1038996958555	15.5060749351133	0.889889441976204	Pass	0.00765676153628628
S28-A04	7_2_2	Unknown	1	jmjd6	Test	12.3317782114715	16.8611017450338	0.979057058357283	Pass	0.0067923511426121
S28-A05	7_2_2	Unknown	1	neil1	Test	13.0816247372414	6.21459525030339	0.961526845749978	Pass	0.0078521262809567
S28-A06	7_2_2	Unknown	1	tdg.1	Test	13.0090128576583	11.6354234322664	0.809365516016044	Pass	0.00651112676535075
S28-A07	7_2_2	Unknown	1	Fgf4	Test	15.1513837504906	26.6550357353929	0.908474996319707	Pass	0.00585753619118968
S28-A08	7_2_2	Unknown	1	dnmt3aa	Test	13.4385861416072	8.89671419541171	0.995891234715828	Pass	0.00720457938855895
S28-A09	7_2_2	Unknown	1	foxo3a	Test	13.9732019915016	1.05589321634592	1	Pass	0.00894309864058025
S28-A10	7_2_2	Unknown	1	kdm2aa	Test	12.1272752697255	9.30453783912314	1	Pass	0.00799264174920814
S28-A11	7_2_2	Unknown	1	ogt.1	Test	12.6450661916773	8.81969285761865	1	Pass	0.00580787823573391
S28-A12	7_2_2	Unknown	1	tert	Test	17.8580911195675	5.63230080922759	0.983858222009091	Pass	0.00846945269463405
S28-A13	7_2_2	Unknown	1	Aldh1a2	Test	12.0427062737488	30.5536309829596	0.880561651473586	Pass	0.00632939983004382
S28-A14	7_2_2	Unknown	1	dnmt3ab	Test	12.7586120263766	4.58340778678243	1	Pass	0.00931843179675896
S28-A15	7_2_2	Unknown	1	gadd45aa	Test	9.89249949921701	185.420225045509	1	Pass	0.00880831281487657
S28-A16	7_2_2	Unknown	1	kdm4b/jmjd2b	Test	12.680386825591	9.3012562834633	1	Pass	0.00927896985905001
S28-A17	7_2_2	Unknown	1	pou5f3	Test	21.378367495236	-1	0.449452868220264	Fail	0.00450652254380955
S28-A18	7_2_2	Unknown	1	tet3	Test	13.5174806826146	3.8861450971904	1	Pass	0.00750583387196605
S28-A19	7_2_2	Unknown	1	Axin2	Test	15.0989149900706	3.12963925180967	0.848553134494508	Pass	0.00461906985014386
S28-A20	7_2_2	Unknown	1	dnmt3ba	Test	14.4312612696651	8.72291291563876	0.95280686411577	Pass	0.00597259676966606
S28-A21	7_2_2	Unknown	1	gadd45ab	Test	11.3111148442176	16.5588026081816	0.989535733799516	Pass	0.00665105353454544
S28-A22	7_2_2	Unknown	1	lats1	Test	14.0365791643653	5.04296264290568	0.920983479590322	Pass	0.00662357811419632
S28-A23	7_2_2	Unknown	1	Rarab	Test	13.6068822975707	4.18926935690614	1	Pass	0.00787731352009684
S28-A24	7_2_2	Unknown	1	ved	Test	999	-1	0	Fail	0.00621567465591404
S28-A25	7_2_2	Unknown	1	cdkn2c	Test	17.3110916148846	5.74096963419165	0.949711910225965	Pass	0.00783619584131053
S28-A26	7_2_2	Unknown	1	dnmt3bb.1	Test	14.6811309502603	10.6339416335562	0.9971502801284	Pass	0.00423247310552466
S28-A27	7_2_2	Unknown	1	hdac1	Test	11.4491239759355	15.2759823834539	0.920658191543915	Pass	0.00482340564875717
S28-A28	7_2_2	Unknown	1	lin28a	Test	14.2053255337994	82.7215697779306	0.96449132574143	Pass	0.00685732601660462
S28-A29	7_2_2	Unknown	1	Rpl13a1	Test	6.90134359565316	11.2319338659465	0.972785457368423	Pass	0.0103523231385501
S28-A30	7_2_2	Unknown	1	vent
S28-A31	7_2_2	Unknown	1	Crabp1b	Test	15.4306896391176	11.4366273650103	0.939386633332128	Pass	0.00704322330326988
S28-A32	7_2_2	Unknown	1	Dusp6	Test	8.11242138024951	40.9647902932907	0.964374277030947	Pass	0.0114011679183338
S28-A33	7_2_2	Unknown	1	Ifg1rb	Test	12.0450279804693	12.9979323720441	0.985429515340664	Pass	0.00843121681178218
S28-A34	7_2_2	Unknown	1	mycb	Test	10.47867524856	32.5623172333385	1	Pass	0.00834510025919904
S28-A35	7_2_2	Unknown	1	Rpl13a2	Test	6.56596021707408	11.4492847106045	0.895383861667358	Pass	0.00967061280246088
S28-A36	7_2_2	Unknown	1	vox	Test	999	-1	0	Fail	0.00881965691216683
S28-A37	7_2_2	Unknown	1	Crabp2a	Test	11.8438385916435	34.0556705850066	1	Pass	0.00685417042127909
S28-A38	7_2_2	Unknown	1	ezh2	Test	14.0596087233183	17.7923559281707	0.989147180140631	Pass	0.00764759834232412
S28-A39	7_2_2	Unknown	1	Igf1	Test	15.8866251399628	15.4753358076868	1	Pass	0.0083332072578722
S28-A40	7_2_2	Unknown	1	mycla	Test	14.7432810833446	10.9868149057752	1	Pass	0.0127686116084135
S28-A41	7_2_2	Unknown	1	sall4	Test	14.5796241278851	21.7592829310895	0.902324932191496	Pass	0.00681715441030155
S28-A42	7_2_2	Unknown	1	xpc	Test	13.6581812972486	6.83017054440154	0.950812676144933	Pass	0.00548824355156608
S28-A43	7_2_2	Unknown	1	Cyp26a1	Test	10.768265196376	218.341261052562	1	Pass	0.00883074677869744
S28-A44	7_2_2	Unknown	1	Fgf8a
S28-A45	7_2_2	Unknown	1	Igf1ra	Test	12.508894222882	7.37686266244865	0.974372590747227	Pass	0.00648470647509694
S28-A46	7_2_2	Unknown	1	nanog	Test	20.0938222545343	158415.18676001	0.909083107931518	Pass	0.0080293555926136
S28-A47	7_2_2	Unknown	1	spop	Test	12.714645646898	7.39594486622679	0.962164392718163	Pass	0.00683061453397148
S28-A48	7_2_2	Unknown	1	yap1	Test	10.7280347008332	39.2899621185947	1	Pass	0.00384749366749803
S34-A01	7_2_3	Unknown	1	actb1	Test	7.00592846395016	47.5540330345746	0.800818987399714	Pass	0.00515123486432751
S34-A02	7_2_3	Unknown	1	dnmt1	Test	12.6770480892243	13.6798724632324	1	Pass	0.00838036413701631
S34-A03	7_2_3	Unknown	1	Fgfr4	Test	12.8430380730049	18.0140946103313	1	Pass	0.00765676153628628
S34-A04	7_2_3	Unknown	1	jmjd6	Test	11.8622400713181	21.9973240585278	1	Pass	0.0067923511426121
S34-A05	7_2_3	Unknown	1	neil1	Test	13.2494939084348	5.49953049769806	1	Pass	0.0078521262809567
S34-A06	7_2_3	Unknown	1	tdg.1	Test	14.236906897959	4.42588253354921	0.887000122736179	Pass	0.00651112676535075
S34-A07	7_2_3	Unknown	1	Fgf4	Test	18.5841811425515	0.835906623541281	0.986918882405756	Pass	0.00585753619118968
S34-A08	7_2_3	Unknown	1	dnmt3aa	Test	13.9346593767285	6.64997693206775	1	Pass	0.00720457938855895
S34-A09	7_2_3	Unknown	1	foxo3a	Test	13.4997539851709	1.48411339935839	1	Pass	0.00894309864058025
S34-A10	7_2_3	Unknown	1	kdm2aa	Test	13.3894234174048	3.83072656749749	1	Pass	0.00799264174920814
S34-A11	7_2_3	Unknown	1	ogt.1	Test	14.0085904396043	3.73652838309564	0.928893355381971	Pass	0.00580787823573391
S34-A12	7_2_3	Unknown	1	tert	Test	15.4583181480469	43.3399310662971	0.976752743101306	Pass	0.00846945269463405
S34-A13	7_2_3	Unknown	1	Aldh1a2	Test	12.7401396071614	18.3521535862278	0.984092371284246	Pass	0.00632939983004382
S34-A14	7_2_3	Unknown	1	dnmt3ab	Test	13.0723172588816	3.64262494769351	0.970070847598945	Pass	0.00931843179675896
S34-A15	7_2_3	Unknown	1	gadd45aa	Test	10.8526697289349	86.9326072418847	1	Pass	0.00880831281487657
S34-A16	7_2_3	Unknown	1	kdm4b/jmjd2b	Test	12.7619477453994	8.82737650947983	1	Pass	0.00927896985905001
S34-A17	7_2_3	Unknown	1	pou5f3	Test	18.1370641283781	-1	0.842115739852339	Pass	0.00450652254380955
S34-A18	7_2_3	Unknown	1	tet3	Test	13.0151227849197	5.49958000477969	0.975683836112165	Pass	0.00750583387196605
S34-A19	7_2_3	Unknown	1	Axin2	Test	14.6964117061844	3.87615744629709	0.980287902317917	Pass	0.00461906985014386
S34-A20	7_2_3	Unknown	1	dnmt3ba	Test	14.9687891027918	6.09074588460597	1	Pass	0.00597259676966606
S34-A21	7_2_3	Unknown	1	gadd45ab	Test	11.1292940820251	19.19545562544	0.980032275627938	Pass	0.00665105353454544
S34-A22	7_2_3	Unknown	1	lats1	Test	14.3260659789931	4.17937881109046	1	Pass	0.00662357811419632
S34-A23	7_2_3	Unknown	1	Rarab	Test	13.2879538918438	5.29602712299255	1	Pass	0.00787731352009684
S34-A24	7_2_3	Unknown	1	ved	Test	15.7803790156628	8.64757632406596	0.922708510985411	Pass	0.00621567465591404
S34-A25	7_2_3	Unknown	1	cdkn2c	Test	16.3179918444334	12.6005429890548	0.964331858306649	Pass	0.00783619584131053
S34-A26	7_2_3	Unknown	1	dnmt3bb.1	Test	14.0855018161985	16.8920832616238	0.922616081001769	Pass	0.00423247310552466
S34-A27	7_2_3	Unknown	1	hdac1	Test	11.9209517641987	11.2522380813181	0.986401276347569	Pass	0.00482340564875717
S34-A28	7_2_3	Unknown	1	lin28a	Test	13.5472644771928	145.67462071496	1	Pass	0.00685732601660462
S34-A29	7_2_3	Unknown	1	Rpl13a1	Test	6.9752623806763	10.6184937518343	1	Pass	0.0103523231385501
S34-A30	7_2_3	Unknown	1	vent
S34-A31	7_2_3	Unknown	1	Crabp1b	Test	14.6319912122188	18.509421172894	1	Pass	0.00704322330326988
S34-A32	7_2_3	Unknown	1	Dusp6	Test	8.84113530102234	24.2180551809267	1	Pass	0.0114011679183338
S34-A33	7_2_3	Unknown	1	Ifg1rb	Test	12.2837430024225	10.9729783674079	1	Pass	0.00843121681178218
S34-A34	7_2_3	Unknown	1	mycb	Test	10.9641993547928	22.7626299748663	1	Pass	0.00834510025919904
S34-A35	7_2_3	Unknown	1	Rpl13a2	Test	6.72258923173308	10.1447846176758	0.973032417082523	Pass	0.00967061280246088
S34-A36	7_2_3	Unknown	1	vox	Test	999	-1	0	Fail	0.00881965691216683
S34-A37	7_2_3	Unknown	1	Crabp2a	Test	12.6832686962286	20.0660036489482	1	Pass	0.00685417042127909
S34-A38	7_2_3	Unknown	1	ezh2	Test	15.5781828390091	6.41980371333799	1	Pass	0.00764759834232412
S34-A39	7_2_3	Unknown	1	Igf1	Test	16.6220033374202	9.38080434072892	1	Pass	0.0083332072578722
S34-A40	7_2_3	Unknown	1	mycla	Test	16.151138191921	4.36162301571326	0.970301705512474	Pass	0.0127686116084135
S34-A41	7_2_3	Unknown	1	sall4	Test	13.3517858099654	44.4813265978875	0.935084185734586	Pass	0.00681715441030155
S34-A42	7_2_3	Unknown	1	xpc	Test	14.5687685319778	3.60568279261865	0.97693811527462	Pass	0.00548824355156608
S34-A43	7_2_3	Unknown	1	Cyp26a1	Test	14.2563743618279	17.2810989385938	1	Pass	0.00883074677869744
S34-A44	7_2_3	Unknown	1	Fgf8a
S34-A45	7_2_3	Unknown	1	Igf1ra	Test	12.1141365888557	9.88937637312807	0.928008046728293	Pass	0.00648470647509694
S34-A46	7_2_3	Unknown	1	nanog	Test	19.3847204325461	16693.1787126907	0.987668201674967	Pass	0.0080293555926136
S34-A47	7_2_3	Unknown	1	spop	Test	13.5276794041732	4.05747619509349	0.93828535599452	Pass	0.00683061453397148
S34-A48	7_2_3	Unknown	1	yap1	Test	10.4465714376039	48.152149355324	0.960183796310089	Pass	0.00384749366749803
S40-A01	7_2_4	Unknown	1	actb1	Test	9.3843356125194	8.87009796607804	0.836043413791919	Pass	0.00515123486432751
S40-A02	7_2_4	Unknown	1	dnmt1	Test	15.8284364212846	2.35162726413645	1	Pass	0.00838036413701631
S40-A03	7_2_4	Unknown	1	Fgfr4	Test	14.5036018776942	6.93647615204456	1	Pass	0.00765676153628628
S40-A04	7_2_4	Unknown	1	jmjd6	Test	14.8901651733988	3.95954458229929	1	Pass	0.0067923511426121
S40-A05	7_2_4	Unknown	1	neil1	Test	15.1677002163052	1.36053202513015	1	Pass	0.0078521262809567
S40-A06	7_2_4	Unknown	1	tdg.1	Test	16.2458050708526	0.910362392198381	0.870674033896986	Pass	0.00651112676535075
S40-A07	7_2_4	Unknown	1	Fgf4	Test	18.3625158020347	1.04532374941024	0.966231237317027	Pass	0.00585753619118968
S40-A08	7_2_4	Unknown	1	dnmt3aa	Test	16.6598841717997	1.34393326836716	1	Pass	0.00720457938855895
S40-A09	7_2_4	Unknown	1	foxo3a	Test	16.188671527877	0.214673805482951	0.964006518609832	Pass	0.00894309864058025
S40-A10	7_2_4	Unknown	1	kdm2aa	Test	14.6181848544075	1.61459117824179	1	Pass	0.00799264174920814
S40-A11	7_2_4	Unknown	1	ogt.1	Test	14.6453587414251	2.50197825372978	1	Pass	0.00580787823573391
S40-A12	7_2_4	Unknown	1	tert	Test	18.0131068716102	4.93674513159874	0.924569995403514	Pass	0.00846945269463405
S40-A13	7_2_4	Unknown	1	Aldh1a2	Test	14.1036028143938	6.77490759354882	0.923255695809421	Pass	0.00632939983004382
S40-A14	7_2_4	Unknown	1	dnmt3ab	Test	15.7559909222771	0.510353699659645	1	Pass	0.00931843179675896
S40-A15	7_2_4	Unknown	1	gadd45aa	Test	13.6512787737252	9.55698103908076	1	Pass	0.00880831281487657
S40-A16	7_2_4	Unknown	1	kdm4b/jmjd2b	Test	14.7113841645679	2.52945689452723	1	Pass	0.00927896985905001
S40-A17	7_2_4	Unknown	1	pou5f3	Test	22.2023403017324	-1	0.898501541886156	Pass	0.00450652254380955
S40-A18	7_2_4	Unknown	1	tet3	Test	15.8049076967415	0.799505135140676	1	Pass	0.00750583387196605
S40-A19	7_2_4	Unknown	1	Axin2	Test	15.9774890593825	1.96199966584924	1	Pass	0.00461906985014386
S40-A20	7_2_4	Unknown	1	dnmt3ba	Test	16.5798245976401	2.07561377260297	1	Pass	0.00597259676966606
S40-A21	7_2_4	Unknown	1	gadd45ab	Test	14.5766870553295	1.16551967861923	1	Pass	0.00665105353454544
S40-A22	7_2_4	Unknown	1	lats1	Test	14.8686635316771	2.93909796855225	1	Pass	0.00662357811419632
S40-A23	7_2_4	Unknown	1	Rarab	Test	15.1714621590757	1.32640298465765	0.984015232978469	Pass	0.00787731352009684
S40-A24	7_2_4	Unknown	1	ved	Test	16.9139781820868	3.93154202684583	0.947124437462339	Pass	0.00621567465591404
S40-A25	7_2_4	Unknown	1	cdkn2c	Test	17.668088943686	4.32770933558641	1	Pass	0.00783619584131053
S40-A26	7_2_4	Unknown	1	dnmt3bb.1	Test	19.3724757882213	0.277746171987242	0.978778054964374	Pass	0.00423247310552466
S40-A27	7_2_4	Unknown	1	hdac1	Test	14.1109937762398	2.72251858808919	0.89778772772431	Pass	0.00482340564875717
S40-A28	7_2_4	Unknown	1	lin28a	Test	16.2100988239765	14.7536315109227	0.994188212668536	Pass	0.00685732601660462
S40-A29	7_2_4	Unknown	1	Rpl13a1	Test	9.16884223305165	2.00552633918459	0.89368508623323	Pass	0.0103523231385501
S40-A30	7_2_4	Unknown	1	vent
S40-A31	7_2_4	Unknown	1	Crabp1b	Test	17.7472499720258	2.83031767525098	1	Pass	0.00704322330326988
S40-A32	7_2_4	Unknown	1	Dusp6	Test	11.4153436294288	3.78235266831628	1	Pass	0.0114011679183338
S40-A33	7_2_4	Unknown	1	Ifg1rb	Test	14.6241504779141	2.08558928009308	1	Pass	0.00843121681178218
S40-A34	7_2_4	Unknown	1	mycb	Test	13.0329694651096	4.95088398882624	1	Pass	0.00834510025919904
S40-A35	7_2_4	Unknown	1	Rpl13a2	Test	9.01973223172989	1.72087568542685	0.841463719023047	Pass	0.00967061280246088
S40-A36	7_2_4	Unknown	1	vox	Test	999	-1	0	Fail	0.00881965691216683
S40-A37	7_2_4	Unknown	1	Crabp2a	Test	15.2203057195948	4.05643749402536	1	Pass	0.00685417042127909
S40-A38	7_2_4	Unknown	1	ezh2	Test	16.9940758651246	2.48167428694443	1	Pass	0.00764759834232412
S40-A39	7_2_4	Unknown	1	Igf1	Test	19.3888232825575	1.42654193417876	1	Pass	0.0083332072578722
S40-A40	7_2_4	Unknown	1	mycla	Test	17.5362889323644	1.75750070184478	1	Pass	0.0127686116084135
S40-A41	7_2_4	Unknown	1	sall4	Test	16.0133789299604	9.44132603059912	0.866598064984832	Pass	0.00681715441030155
S40-A42	7_2_4	Unknown	1	xpc	Test	17.0455055665203	0.63439260208193	0.921391876902799	Pass	0.00548824355156608
S40-A43	7_2_4	Unknown	1	Cyp26a1	Test	18.4784286387144	0.802089649854831	1	Pass	0.00883074677869744
S40-A44	7_2_4	Unknown	1	Fgf8a
S40-A45	7_2_4	Unknown	1	Igf1ra	Test	13.8651920086665	2.69468084978064	1	Pass	0.00648470647509694
S40-A46	7_2_4	Unknown	1	nanog	Test	999	-1	0	Fail	0.0080293555926136
S40-A47	7_2_4	Unknown	1	spop	Test	15.5798443969489	0.891522534447055	0.965151692681816	Pass	0.00683061453397148
S40-A48	7_2_4	Unknown	1	yap1	Test	13.2811132213055	6.20907265885257	0.858908629976219	Pass	0.00384749366749803
S46-A01	7_2_5	Unknown	1	actb1	Test	7.08977375651164	44.8207379577891	0.792595741303464	Pass	0.00515123486432751
S46-A02	7_2_5	Unknown	1	dnmt1	Test	10.9640665577329	35.6248365131631	1	Pass	0.00838036413701631
S46-A03	7_2_5	Unknown	1	Fgfr4	Test	12.6110617469293	20.5832185595363	1	Pass	0.00765676153628628
S46-A04	7_2_5	Unknown	1	jmjd6	Test	11.7521761588399	23.4120965262024	1	Pass	0.0067923511426121
S46-A05	7_2_5	Unknown	1	neil1	Test	12.0026098290818	13.6345990130492	0.97530744739182	Pass	0.0078521262809567
S46-A06	7_2_5	Unknown	1	tdg.1	Test	12.2234537606087	21.5944760838371	0.875381416863075	Pass	0.00651112676535075
S46-A07	7_2_5	Unknown	1	Fgf4	Test	13.5166696049949	138.61519776152	0.987640695246704	Pass	0.00585753619118968
S46-A08	7_2_5	Unknown	1	dnmt3aa	Test	12.3120687271167	17.2301507087023	1	Pass	0.00720457938855895
S46-A09	7_2_5	Unknown	1	foxo3a	Test	10.7310021471326	10.8663967814721	1	Pass	0.00894309864058025
S46-A10	7_2_5	Unknown	1	kdm2aa	Test	11.4189455709444	15.3106158848248	1	Pass	0.00799264174920814
S46-A11	7_2_5	Unknown	1	ogt.1	Test	11.1574742130933	22.5100644499433	0.988810190593106	Pass	0.00580787823573391
S46-A12	7_2_5	Unknown	1	tert	Test	15.3622408543274	47.0292668228177	0.962633259391333	Pass	0.00846945269463405
S46-A13	7_2_5	Unknown	1	Aldh1a2	Test	12.390529505851	23.6950986760086	0.956553193329448	Pass	0.00632939983004382
S46-A14	7_2_5	Unknown	1	dnmt3ab	Test	11.2173744835808	14.1703164054951	0.985422515267767	Pass	0.00931843179675896
S46-A15	7_2_5	Unknown	1	gadd45aa	Test	11.3294726024203	59.6787983726113	1	Pass	0.00880831281487657
S46-A16	7_2_5	Unknown	1	kdm4b/jmjd2b	Test	11.7351326494579	17.0506044564777	1	Pass	0.00927896985905001
S46-A17	7_2_5	Unknown	1	pou5f3	Test	18.2876483980299	-1	0.825386813781479	Pass	0.00450652254380955
S46-A18	7_2_5	Unknown	1	tet3	Test	11.6466349298818	14.1630522089919	1	Pass	0.00750583387196605
S46-A19	7_2_5	Unknown	1	Axin2	Test	12.335328106551	13.5954778651225	0.925918481961588	Pass	0.00461906985014386
S46-A20	7_2_5	Unknown	1	dnmt3ba	Test	12.6853211855318	28.0114058205747	1	Pass	0.00597259676966606
S46-A21	7_2_5	Unknown	1	gadd45ab	Test	11.070237906352	20.1391416648998	0.966993084157196	Pass	0.00665105353454544
S46-A22	7_2_5	Unknown	1	lats1	Test	12.3263478753882	15.2970969607229	0.981356224486292	Pass	0.00662357811419632
S46-A23	7_2_5	Unknown	1	Rarab	Test	11.7913561166326	15.9114950635093	1	Pass	0.00787731352009684
S46-A24	7_2_5	Unknown	1	ved	Test	14.612746441454	19.4761679038126	0.898438104328653	Pass	0.00621567465591404
S46-A25	7_2_5	Unknown	1	cdkn2c	Test	15.0601294394497	34.1045519850511	0.949431539853979	Pass	0.00783619584131053
S46-A26	7_2_5	Unknown	1	dnmt3bb.1	Test	12.775314747164	46.7511609024999	1	Pass	0.00423247310552466
S46-A27	7_2_5	Unknown	1	hdac1	Test	10.1493872992872	35.4608593095015	0.876802067677816	Pass	0.00482340564875717
S46-A28	7_2_5	Unknown	1	lin28a	Test	15.3878637907282	29.9211225563075	1	Pass	0.00685732601660462
S46-A29	7_2_5	Unknown	1	Rpl13a1	Test	6.07618540306642	21.0251515255894	0.878567354509152	Pass	0.0103523231385501
S46-A30	7_2_5	Unknown	1	vent
S46-A31	7_2_5	Unknown	1	Crabp1b	Test	13.3726531796128	39.5440026331751	0.988894527683086	Pass	0.00704322330326988
S46-A32	7_2_5	Unknown	1	Dusp6	Test	8.71966128073591	26.4357299826277	1	Pass	0.0114011679183338
S46-A33	7_2_5	Unknown	1	Ifg1rb	Test	11.9574998706689	13.8306403861434	1	Pass	0.00843121681178218
S46-A34	7_2_5	Unknown	1	mycb	Test	11.1309669329845	20.1286119329709	1	Pass	0.00834510025919904
S46-A35	7_2_5	Unknown	1	Rpl13a2	Test	5.49859639776142	26.1087962636664	0.929363218653448	Pass	0.00967061280246088
S46-A36	7_2_5	Unknown	1	vox	Test	19.2015720287828	2.14723967755719	0.987891090413139	Pass	0.00881965691216683
S46-A37	7_2_5	Unknown	1	Crabp2a	Test	11.100653151561	54.397446292363	1	Pass	0.00685417042127909
S46-A38	7_2_5	Unknown	1	ezh2	Test	12.8538628342982	39.9710892281186	1	Pass	0.00764759834232412
S46-A39	7_2_5	Unknown	1	Igf1	Test	15.9790622593346	14.531581355228	1	Pass	0.0083332072578722
S46-A40	7_2_5	Unknown	1	mycla	Test	13.9941078599049	17.9629590026869	1	Pass	0.0127686116084135
S46-A41	7_2_5	Unknown	1	sall4	Test	13.9473933476961	31.4443307405913	0.979145676509912	Pass	0.00681715441030155
S46-A42	7_2_5	Unknown	1	xpc	Test	11.8368517371955	24.5113292078949	1	Pass	0.00548824355156608
S46-A43	7_2_5	Unknown	1	Cyp26a1	Test	14.9696035738869	10.2879671111691	1	Pass	0.00883074677869744
S46-A44	7_2_5	Unknown	1	Fgf8a
S46-A45	7_2_5	Unknown	1	Igf1ra	Test	11.6603554638647	13.8515819444144	1	Pass	0.00648470647509694
S46-A46	7_2_5	Unknown	1	nanog	Test	17.3697844026623	27.9016001017839	0.979896652034873	Pass	0.0080293555926136
S46-A47	7_2_5	Unknown	1	spop	Test	11.5299632685443	17.7385467809076	0.953311694622468	Pass	0.00683061453397148
S46-A48	7_2_5	Unknown	1	yap1	Test	10.9268949626136	34.0307532590982	0.975442525564614	Pass	0.00384749366749803
S05-A01	7_2_8	Unknown	1	actb1	Test	7.9461512200322	24.48496679848	0.977518710687867	Pass	0.00515123486432751
S05-A02	7_2_8	Unknown	1	dnmt1	Test	12.5141344489905	14.9835441527557	1	Pass	0.00838036413701631
S05-A03	7_2_8	Unknown	1	Fgfr4	Test	13.0762190505754	15.7547281735394	1	Pass	0.00765676153628628
S05-A04	7_2_8	Unknown	1	jmjd6	Test	13.1820798388427	10.4172348764497	1	Pass	0.0067923511426121
S05-A05	7_2_8	Unknown	1	neil1	Test	14.1002893451594	2.9598425535339	1	Pass	0.0078521262809567
S05-A06	7_2_8	Unknown	1	tdg.1	Test	13.6618067938223	6.96001817913207	0.953859820795263	Pass	0.00651112676535075
S05-A07	7_2_8	Unknown	1	Fgf4	Test	15.0503115665532	29.5155269818673	0.938334399456272	Pass	0.00585753619118968
S05-A08	7_2_8	Unknown	1	dnmt3aa	Test	14.0997687567639	6.03596797794861	0.982458236729925	Pass	0.00720457938855895
S05-A09	7_2_8	Unknown	1	foxo3a	Test	12.1401061925197	3.94506614260833	0.953343856167584	Pass	0.00894309864058025
S05-A10	7_2_8	Unknown	1	kdm2aa	Test	12.4138577993867	7.60646787601398	1	Pass	0.00799264174920814
S05-A11	7_2_8	Unknown	1	ogt.1	Test	14.6158208925149	2.54896258153608	0.952858707235456	Pass	0.00580787823573391
S05-A12	7_2_8	Unknown	1	tert	Test	16.3619731949624	20.0993090917637	1	Pass	0.00846945269463405
S05-A13	7_2_8	Unknown	1	Aldh1a2	Test	12.975686546923	15.4497304165312	1	Pass	0.00632939983004382
S05-A14	7_2_8	Unknown	1	dnmt3ab	Test	11.9212245090558	8.46291233209259	1	Pass	0.00931843179675896
S05-A15	7_2_8	Unknown	1	gadd45aa	Test	12.4642372371447	24.3795663908867	1	Pass	0.00880831281487657
S05-A16	7_2_8	Unknown	1	kdm4b/jmjd2b	Test	13.2882174737443	6.29935696297801	0.999313798356712	Pass	0.00927896985905001
S05-A17	7_2_8	Unknown	1	pou5f3	Test	17.803033616012	-1	0.902668458601453	Pass	0.00450652254380955
S05-A18	7_2_8	Unknown	1	tet3	Test	13.3156424335935	4.46798727528269	1	Pass	0.00750583387196605
S05-A19	7_2_8	Unknown	1	Axin2	Test	13.7166683963657	6.52452615765008	0.982362489329753	Pass	0.00461906985014386
S05-A20	7_2_8	Unknown	1	dnmt3ba	Test	14.1454281677405	10.5587026039671	0.953845823507585	Pass	0.00597259676966606
S05-A21	7_2_8	Unknown	1	gadd45ab	Test	12.4006703277494	6.83117077354032	1	Pass	0.00665105353454544
S05-A22	7_2_8	Unknown	1	lats1	Test	13.6943494659939	6.29683185043722	1	Pass	0.00662357811419632
S05-A23	7_2_8	Unknown	1	Rarab	Test	12.8561129885055	7.27456978910283	1	Pass	0.00787731352009684
S05-A24	7_2_8	Unknown	1	ved	Test	15.4887330977371	10.591744398956	0.940058892658176	Pass	0.00621567465591404
S05-A25	7_2_8	Unknown	1	cdkn2c	Test	17.3968528349893	5.36417068138057	0.981866547932212	Pass	0.00783619584131053
S05-A26	7_2_8	Unknown	1	dnmt3bb.1	Test	14.2255089983051	15.150927710241	0.972354317728362	Pass	0.00423247310552466
S05-A27	7_2_8	Unknown	1	hdac1	Test	11.6686156305833	13.2508938738113	0.983016819103414	Pass	0.00482340564875717
S05-A28	7_2_8	Unknown	1	lin28a	Test	15.1671895377093	36.1736875497554	1	Pass	0.00685732601660462
S05-A29	7_2_8	Unknown	1	Rpl13a1	Test	7.29220477443941	8.34600592430756	0.929746555243001	Pass	0.0103523231385501
S05-A30	7_2_8	Unknown	1	vent
S05-A31	7_2_8	Unknown	1	Crabp1b	Test	14.59879215984	18.8835728258737	1	Pass	0.00704322330326988
S05-A32	7_2_8	Unknown	1	Dusp6	Test	9.53546999421485	14.6769958857985	1	Pass	0.0114011679183338
S05-A33	7_2_8	Unknown	1	Ifg1rb	Test	12.5136410182761	9.32161911683879	1	Pass	0.00843121681178218
S05-A34	7_2_8	Unknown	1	mycb	Test	11.9943040572977	10.6493575940934	1	Pass	0.00834510025919904
S05-A35	7_2_8	Unknown	1	Rpl13a2	Test	7.12703299112914	7.42312605805435	0.899094825139739	Pass	0.00967061280246088
S05-A36	7_2_8	Unknown	1	vox	Test	16.4155377524908	20.3762066140007	1	Pass	0.00881965691216683
S05-A37	7_2_8	Unknown	1	Crabp2a	Test	13.5970823627003	11.2817282993256	1	Pass	0.00685417042127909
S05-A38	7_2_8	Unknown	1	ezh2	Test	14.4494545769793	13.69560541429	1	Pass	0.00764759834232412
S05-A39	7_2_8	Unknown	1	Igf1	Test	17.3907755667886	5.55863028769022	1	Pass	0.0083332072578722
S05-A40	7_2_8	Unknown	1	mycla	Test	14.6050700437355	12.0298558532241	1	Pass	0.0127686116084135
S05-A41	7_2_8	Unknown	1	sall4	Test	15.4637618615642	13.0028005144832	0.970444825739659	Pass	0.00681715441030155
S05-A42	7_2_8	Unknown	1	xpc	Test	13.9296962605605	5.64552697397612	1	Pass	0.00548824355156608
S05-A43	7_2_8	Unknown	1	Cyp26a1	Test	16.480882762024	3.42814446254238	1	Pass	0.00883074677869744
S05-A44	7_2_8	Unknown	1	Fgf8a
S05-A45	7_2_8	Unknown	1	Igf1ra	Test	12.6775981392123	6.50833454565981	1	Pass	0.00648470647509694
S05-A46	7_2_8	Unknown	1	nanog	Test	18.7338646384594	2116.18573450635	1	Pass	0.0080293555926136
S05-A47	7_2_8	Unknown	1	spop	Test	12.8368860046568	6.75758503306726	1	Pass	0.00683061453397148
S05-A48	7_2_8	Unknown	1	yap1	Test	12.0547521278461	15.062821339361	0.854632575841378	Pass	0.00384749366749803
S10-A01	7_2_L	Unknown	1	actb1	Test	4.42303567967985	294.540465733459	0.682371824850907	Pass	0.00515123486432751
S10-A02	7_2_L	Unknown	1	dnmt1	Test	8.40881321599926	148.528148048565	1	Pass	0.00838036413701631
S10-A03	7_2_L	Unknown	1	Fgfr4	Test	8.97523457492141	166.344626681188	1	Pass	0.00765676153628628
S10-A04	7_2_L	Unknown	1	jmjd6	Test	9.27101242408105	95.4306322074691	1	Pass	0.0067923511426121
S10-A05	7_2_L	Unknown	1	neil1	Test	9.76477267441737	69.5568365336283	1	Pass	0.0078521262809567
S10-A06	7_2_L	Unknown	1	tdg.1	Test	8.84817405884647	307.790718162201	0.895583349158185	Pass	0.00651112676535075
S10-A07	7_2_L	Unknown	1	Fgf4	Test	11.3783539348606	1197.92091577756	0.957126062674713	Pass	0.00585753619118968
S10-A08	7_2_L	Unknown	1	dnmt3aa	Test	9.39391430855259	95.4759268229896	0.996735237697142	Pass	0.00720457938855895
S10-A09	7_2_L	Unknown	1	foxo3a	Test	8.43544389504553	56.6156366368731	0.978055383246567	Pass	0.00894309864058025
S10-A10	7_2_L	Unknown	1	kdm2aa	Test	8.70710305677803	103.059893215764	1	Pass	0.00799264174920814
S10-A11	7_2_L	Unknown	1	ogt.1	Test	9.65057522256146	58.1542355658182	1	Pass	0.00580787823573391
S10-A12	7_2_L	Unknown	1	tert	Test	12.7447741581258	435.473579138764	1	Pass	0.00846945269463405
S10-A13	7_2_L	Unknown	1	Aldh1a2	Test	9.07478543555113	267.377827124165	0.901830386934243	Pass	0.00632939983004382
S10-A14	7_2_L	Unknown	1	dnmt3ab	Test	8.50004866867355	103.66348725109	1	Pass	0.00931843179675896
S10-A15	7_2_L	Unknown	1	gadd45aa	Test	8.72107567783394	467.209215817565	1	Pass	0.00880831281487657
S10-A16	7_2_L	Unknown	1	kdm4b/jmjd2b	Test	9.53646028864391	69.8138878398464	1	Pass	0.00927896985905001
S10-A17	7_2_L	Unknown	1	pou5f3	Test	16.5530678353796	-1	0.882855428461682	Pass	0.00450652254380955
S10-A18	7_2_L	Unknown	1	tet3	Test	9.02703350096026	86.6114154740078	0.96790460615717	Pass	0.00750583387196605
S10-A19	7_2_L	Unknown	1	Axin2	Test	8.77506876688316	90.1955738390433	1	Pass	0.00461906985014386
S10-A20	7_2_L	Unknown	1	dnmt3ba	Test	9.95953373632998	173.125425183103	1	Pass	0.00597259676966606
S10-A21	7_2_L	Unknown	1	gadd45ab	Test	8.91872039216986	115.709775123002	1	Pass	0.00665105353454544
S10-A22	7_2_L	Unknown	1	lats1	Test	10.0334770484827	67.7194351859065	0.976411872420272	Pass	0.00662357811419632
S10-A23	7_2_L	Unknown	1	Rarab	Test	9.05638135362234	118.795617028898	0.940364269211586	Pass	0.00787731352009684
S10-A24	7_2_L	Unknown	1	ved	Test	12.7620661264631	70.5315964824158	0.911295674769613	Pass	0.00621567465591404
S10-A25	7_2_L	Unknown	1	cdkn2c	Test	12.8828866443791	191.115751916915	1	Pass	0.00783619584131053
S10-A26	7_2_L	Unknown	1	dnmt3bb.1	Test	9.79987194937948	471.87291345699	0.990714359371895	Pass	0.00423247310552466
S10-A27	7_2_L	Unknown	1	hdac1	Test	7.96011024860021	146.488002762769	1	Pass	0.00482340564875717
S10-A28	7_2_L	Unknown	1	lin28a	Test	11.0726056565987	1223.46405128748	0.977639097965757	Pass	0.00685732601660462
S10-A29	7_2_L	Unknown	1	Rpl13a1	Test	4.41980126321671	74.0134344770362	0.754550616894794	Pass	0.0103523231385501
S10-A30	7_2_L	Unknown	1	vent
S10-A31	7_2_L	Unknown	1	Crabp1b	Test	11.2306626619442	143.82752056301	0.945409619548798	Pass	0.00704322330326988
S10-A32	7_2_L	Unknown	1	Dusp6	Test	6.46050676265414	134.858135711361	1	Pass	0.0114011679183338
S10-A33	7_2_L	Unknown	1	Ifg1rb	Test	8.96063363397535	115.930447675451	1	Pass	0.00843121681178218
S10-A34	7_2_L	Unknown	1	mycb	Test	8.2063110731794	173.963273682322	1	Pass	0.00834510025919904
S10-A35	7_2_L	Unknown	1	Rpl13a2	Test	4.3737811662785	62.2393913072887	0.706597716884141	Pass	0.00967061280246088
S10-A36	7_2_L	Unknown	1	vox	Test	15.3496156248757	48.196035897514	1	Pass	0.00881965691216683
S10-A37	7_2_L	Unknown	1	Crabp2a	Test	8.77418665836885	235.649945708131	1	Pass	0.00685417042127909
S10-A38	7_2_L	Unknown	1	ezh2	Test	9.78271202935541	314.110323469957	1	Pass	0.00764759834232412
S10-A39	7_2_L	Unknown	1	Igf1	Test	12.6803363430751	137.251115169786	1	Pass	0.0083332072578722
S10-A40	7_2_L	Unknown	1	mycla	Test	10.5412617617265	173.141339100625	1	Pass	0.0127686116084135
S10-A41	7_2_L	Unknown	1	sall4	Test	10.0677321659648	301.126685185016	0.873111996471019	Pass	0.00681715441030155
S10-A42	7_2_L	Unknown	1	xpc	Test	10.7918533724792	51.0227906412835	0.998274318065838	Pass	0.00548824355156608
S10-A43	7_2_L	Unknown	1	Cyp26a1	Test	10.4449874138122	276.203229971882	1	Pass	0.00883074677869744
S10-A44	7_2_L	Unknown	1	Fgf8a
S10-A45	7_2_L	Unknown	1	Igf1ra	Test	8.74203453645342	120.939510368234	1	Pass	0.00648470647509694
S10-A46	7_2_L	Unknown	1	nanog	Test	16.5485055315755	2.05955360533001	0.9894858990402	Pass	0.0080293555926136
S10-A47	7_2_L	Unknown	1	spop	Test	8.98934078960966	115.79469477899	0.994363919637761	Pass	0.00683061453397148
S10-A48	7_2_L	Unknown	1	yap1	Test	7.77250384865986	332.538243580898	0.937366186445724	Pass	0.00384749366749803
S04-A01	7_2_S	Unknown	1	actb1	Test	5.32969255729945	155.291965431305	0.822164187929987	Pass	0.00515123486432751
S04-A02	7_2_S	Unknown	1	dnmt1	Test	9.24731268595337	92.9692023365555	1	Pass	0.00838036413701631
S04-A03	7_2_S	Unknown	1	Fgfr4	Test	10.5871405710172	65.8688574932942	1	Pass	0.00765676153628628
S04-A04	7_2_S	Unknown	1	jmjd6	Test	10.1913152624364	56.6679316622911	0.989780161689685	Pass	0.0067923511426121
S04-A05	7_2_S	Unknown	1	neil1	Test	10.5760864778199	38.5272983617456	1	Pass	0.0078521262809567
S04-A06	7_2_S	Unknown	1	tdg.1	Test	10.304239429764	97.8290582553664	0.893784845019201	Pass	0.00651112676535075
S04-A07	7_2_S	Unknown	1	Fgf4	Test	12.5511109992636	367.063615895949	0.995778032532027	Pass	0.00585753619118968
S04-A08	7_2_S	Unknown	1	dnmt3aa	Test	10.6636200545801	45.3259756457827	1	Pass	0.00720457938855895
S04-A09	7_2_S	Unknown	1	foxo3a	Test	9.56335042702399	25.1603534694228	0.999234029799547	Pass	0.00894309864058025
S04-A10	7_2_S	Unknown	1	kdm2aa	Test	9.66798977928221	52.4409078464477	1	Pass	0.00799264174920814
S04-A11	7_2_S	Unknown	1	ogt.1	Test	10.4796558791498	34.4977302891454	1	Pass	0.00580787823573391
S04-A12	7_2_S	Unknown	1	tert	Test	13.2238188615316	289.772618841992	0.947411609380579	Pass	0.00846945269463405
S04-A13	7_2_S	Unknown	1	Aldh1a2	Test	9.65488611630802	174.981743044819	0.978216089392449	Pass	0.00632939983004382
S04-A14	7_2_S	Unknown	1	dnmt3ab	Test	9.69964361245367	43.0620095778359	1	Pass	0.00931843179675896
S04-A15	7_2_S	Unknown	1	gadd45aa	Test	9.72335563031569	211.889448356184	1	Pass	0.00880831281487657
S04-A16	7_2_S	Unknown	1	kdm4b/jmjd2b	Test	9.86901735762225	56.4084377784525	1	Pass	0.00927896985905001
S04-A17	7_2_S	Unknown	1	pou5f3	Test	15.5436679140487	-1	0.879972693950485	Pass	0.00450652254380955
S04-A18	7_2_S	Unknown	1	tet3	Test	10.2086465544259	38.2691321593234	1	Pass	0.00750583387196605
S04-A19	7_2_S	Unknown	1	Axin2	Test	10.2774979074562	40.5872474585621	1	Pass	0.00461906985014386
S04-A20	7_2_S	Unknown	1	dnmt3ba	Test	10.9912892438665	86.8849358935722	1	Pass	0.00597259676966606
S04-A21	7_2_S	Unknown	1	gadd45ab	Test	9.71914079200056	60.3781641647933	1	Pass	0.00665105353454544
S04-A22	7_2_S	Unknown	1	lats1	Test	11.2118602788479	31.5252580693628	0.987599925834045	Pass	0.00662357811419632
S04-A23	7_2_S	Unknown	1	Rarab	Test	9.91780577933302	63.0676742948986	1	Pass	0.00787731352009684
S04-A24	7_2_S	Unknown	1	ved	Test	14.0337763943415	29.130273665552	0.855041633504924	Pass	0.00621567465591404
S04-A25	7_2_S	Unknown	1	cdkn2c	Test	13.6786743086032	101.794348709082	1	Pass	0.00783619584131053
S04-A26	7_2_S	Unknown	1	dnmt3bb.1	Test	10.7868280001896	219.172899849819	1	Pass	0.00423247310552466
S04-A27	7_2_S	Unknown	1	hdac1	Test	8.80902628539944	84.5124845408599	0.990408491415169	Pass	0.00482340564875717
S04-A28	7_2_S	Unknown	1	lin28a	Test	11.2743593203016	1028.59061800876	1	Pass	0.00685732601660462
S04-A29	7_2_S	Unknown	1	Rpl13a1	Test	4.95495383329209	49.2857793200043	0.984984611097365	Pass	0.0103523231385501
S04-A30	7_2_S	Unknown	1	vent
S04-A31	7_2_S	Unknown	1	Crabp1b	Test	12.0003278069037	90.4373609823609	0.929210782855183	Pass	0.00704322330326988
S04-A32	7_2_S	Unknown	1	Dusp6	Test	6.78293230934102	106.87510068173	1	Pass	0.0114011679183338
S04-A33	7_2_S	Unknown	1	Ifg1rb	Test	9.93295819832658	58.1590878928793	1	Pass	0.00843121681178218
S04-A34	7_2_S	Unknown	1	mycb	Test	8.90114884729215	104.215035351794	1	Pass	0.00834510025919904
S04-A35	7_2_S	Unknown	1	Rpl13a2	Test	4.8705469129943	42.4075592944896	0.956848970998101	Pass	0.00967061280246088
S04-A36	7_2_S	Unknown	1	vox	Test	16.6307082461583	17.1257301347571	1	Pass	0.00881965691216683
S04-A37	7_2_S	Unknown	1	Crabp2a	Test	10.5432562417471	77.2898495035371	1	Pass	0.00685417042127909
S04-A38	7_2_S	Unknown	1	ezh2	Test	10.7994640669832	158.733022472734	1	Pass	0.00764759834232412
S04-A39	7_2_S	Unknown	1	Igf1	Test	14.0643249025466	53.5016365068124	0.983222144455412	Pass	0.0083332072578722
S04-A40	7_2_S	Unknown	1	mycla	Test	11.5844255816426	87.3193788664284	1	Pass	0.0127686116084135
S04-A41	7_2_S	Unknown	1	sall4	Test	11.641201012774	120.448810698759	0.986572280444394	Pass	0.00681715441030155
S04-A42	7_2_S	Unknown	1	xpc	Test	11.4784552216082	31.5185041238304	0.984689353309616	Pass	0.00548824355156608
S04-A43	7_2_S	Unknown	1	Cyp26a1	Test	11.3506626483472	142.958976170107	1	Pass	0.00883074677869744
S04-A44	7_2_S	Unknown	1	Fgf8a
S04-A45	7_2_S	Unknown	1	Igf1ra	Test	9.30564358525418	79.5832379989165	0.964097181273271	Pass	0.00648470647509694
S04-A46	7_2_S	Unknown	1	nanog	Test	15.7858722116368	0.183121867542445	1	Pass	0.0080293555926136
S04-A47	7_2_S	Unknown	1	spop	Test	10.0408565171346	53.2684999882051	0.889298375851053	Pass	0.00683061453397148
S04-A48	7_2_S	Unknown	1	yap1	Test	8.72873853801758	166.624223181218	0.991779257350522	Pass	0.00384749366749803
S29-A01	7_3_1	Unknown	1	actb1	Test	4.7226792837078	238.379710559087	0.843393854386948	Pass	0.00515123486432751
S29-A02	7_3_1	Unknown	1	dnmt1	Test	9.92162734423765	63.7838028227867	1	Pass	0.00838036413701631
S29-A03	7_3_1	Unknown	1	Fgfr4	Test	10.6336427047455	64.1317789802386	1	Pass	0.00765676153628628
S29-A04	7_3_1	Unknown	1	jmjd6	Test	10.4196707829831	49.7935208390533	1	Pass	0.0067923511426121
S29-A05	7_3_1	Unknown	1	neil1	Test	11.2850988534739	22.9905451328548	1	Pass	0.0078521262809567
S29-A06	7_3_1	Unknown	1	tdg.1	Test	10.834584388832	64.4403518111766	0.934762556190704	Pass	0.00651112676535075
S29-A07	7_3_1	Unknown	1	Fgf4	Test	13.1196679508033	206.873126544196	0.935192173165759	Pass	0.00585753619118968
S29-A08	7_3_1	Unknown	1	dnmt3aa	Test	11.226657227864	32.5742101567924	1	Pass	0.00720457938855895
S29-A09	7_3_1	Unknown	1	foxo3a	Test	9.59037278643736	24.6761991982425	1	Pass	0.00894309864058025
S29-A10	7_3_1	Unknown	1	kdm2aa	Test	9.96385796656369	42.5914996668812	1	Pass	0.00799264174920814
S29-A11	7_3_1	Unknown	1	ogt.1	Test	10.4880586424796	34.3156309841059	0.996515750563655	Pass	0.00580787823573391
S29-A12	7_3_1	Unknown	1	tert	Test	14.0162709372032	147.712058428213	0.918555423188865	Pass	0.00846945269463405
S29-A13	7_3_1	Unknown	1	Aldh1a2	Test	9.90580716718666	145.662123095973	1	Pass	0.00632939983004382
S29-A14	7_3_1	Unknown	1	dnmt3ab	Test	10.6504818274553	21.4624809157536	1	Pass	0.00931843179675896
S29-A15	7_3_1	Unknown	1	gadd45aa	Test	9.58037971090933	237.189724182202	1	Pass	0.00880831281487657
S29-A16	7_3_1	Unknown	1	kdm4b/jmjd2b	Test	10.3814739441565	40.6120390423613	1	Pass	0.00927896985905001
S29-A17	7_3_1	Unknown	1	pou5f3	Test	16.8267047953935	-1	0.932134302270577	Pass	0.00450652254380955
S29-A18	7_3_1	Unknown	1	tet3	Test	10.6646189259103	27.923077576998	1	Pass	0.00750583387196605
S29-A19	7_3_1	Unknown	1	Axin2	Test	11.0113758867851	27.4785286759535	0.862008673452125	Pass	0.00461906985014386
S29-A20	7_3_1	Unknown	1	dnmt3ba	Test	12.5011789167002	31.6791234312788	0.986745827924161	Pass	0.00597259676966606
S29-A21	7_3_1	Unknown	1	gadd45ab	Test	9.40632089107257	77.854292344963	1	Pass	0.00665105353454544
S29-A22	7_3_1	Unknown	1	lats1	Test	11.6622700635601	23.5363122085366	1	Pass	0.00662357811419632
S29-A23	7_3_1	Unknown	1	Rarab	Test	10.4898745756263	41.4175662533811	1	Pass	0.00787731352009684
S29-A24	7_3_1	Unknown	1	ved	Test	15.1533785463839	13.3733432196588	0.840559296120554	Pass	0.00621567465591404
S29-A25	7_3_1	Unknown	1	cdkn2c	Test	14.678799021879	46.121630238082	1	Pass	0.00783619584131053
S29-A26	7_3_1	Unknown	1	dnmt3bb.1	Test	11.5236971334204	123.634000954772	0.980965317109652	Pass	0.00423247310552466
S29-A27	7_3_1	Unknown	1	hdac1	Test	9.34484258931803	59.7234036412569	0.914445606853888	Pass	0.00482340564875717
S29-A28	7_3_1	Unknown	1	lin28a	Test	11.8776456694111	612.257427269841	1	Pass	0.00685732601660462
S29-A29	7_3_1	Unknown	1	Rpl13a1	Test	4.90917615517314	51.0302017249752	0.969725385057714	Pass	0.0103523231385501
S29-A30	7_3_1	Unknown	1	vent
S29-A31	7_3_1	Unknown	1	Crabp1b	Test	11.4461104510092	126.310351707631	0.992508217374882	Pass	0.00704322330326988
S29-A32	7_3_1	Unknown	1	Dusp6	Test	6.70107082816824	113.375666218429	1	Pass	0.0114011679183338
S29-A33	7_3_1	Unknown	1	Ifg1rb	Test	9.64752822884465	71.2132055750887	1	Pass	0.00843121681178218
S29-A34	7_3_1	Unknown	1	mycb	Test	9.48552048859045	67.7299609608485	1	Pass	0.00834510025919904
S29-A35	7_3_1	Unknown	1	Rpl13a2	Test	4.86352591027661	42.6381368145281	0.954508636758868	Pass	0.00967061280246088
S29-A36	7_3_1	Unknown	1	vox	Test	16.6236698260384	17.223361868231	1	Pass	0.00881965691216683
S29-A37	7_3_1	Unknown	1	Crabp2a	Test	11.1656138577125	52.2156373081604	1	Pass	0.00685417042127909
S29-A38	7_3_1	Unknown	1	ezh2	Test	12.1488006999896	64.1643177932391	1	Pass	0.00764759834232412
S29-A39	7_3_1	Unknown	1	Igf1	Test	15.5849626051683	19.0029330135354	1	Pass	0.0083332072578722
S29-A40	7_3_1	Unknown	1	mycla	Test	12.8071799251966	39.1416557830586	1	Pass	0.0127686116084135
S29-A41	7_3_1	Unknown	1	sall4	Test	10.8306429377238	193.108384413576	0.997429731523605	Pass	0.00681715441030155
S29-A42	7_3_1	Unknown	1	xpc	Test	12.1623308626189	19.5073208389398	0.92785806134104	Pass	0.00548824355156608
S29-A43	7_3_1	Unknown	1	Cyp26a1	Test	10.2348332225961	321.807844526572	1	Pass	0.00883074677869744
S29-A44	7_3_1	Unknown	1	Fgf8a
S29-A45	7_3_1	Unknown	1	Igf1ra	Test	9.44757519509535	71.6230848027009	0.965419883862221	Pass	0.00648470647509694
S29-A46	7_3_1	Unknown	1	nanog	Test	17.2083966999611	16.7190107686146	0.961405278703666	Pass	0.0080293555926136
S29-A47	7_3_1	Unknown	1	spop	Test	10.3720722473226	41.7109898166701	0.926640882379643	Pass	0.00683061453397148
S29-A48	7_3_1	Unknown	1	yap1	Test	9.00741776512153	136.231584753859	0.785074833638512	Pass	0.00384749366749803
S35-A01	7_3_2	Unknown	1	actb1	Test	4.75745979144538	232.597482380201	0.876228988605062	Pass	0.00515123486432751
S35-A02	7_3_2	Unknown	1	dnmt1	Test	9.06952081288309	102.679075378009	1	Pass	0.00838036413701631
S35-A03	7_3_2	Unknown	1	Fgfr4	Test	10.1398033396799	85.179413583789	1	Pass	0.00765676153628628
S35-A04	7_3_2	Unknown	1	jmjd6	Test	10.0264975203879	62.2120676415046	0.990943436133348	Pass	0.0067923511426121
S35-A05	7_3_2	Unknown	1	neil1	Test	10.0856438300821	55.0639013511806	1	Pass	0.0078521262809567
S35-A06	7_3_2	Unknown	1	tdg.1	Test	9.76522273017635	149.534866106033	0.951486280481788	Pass	0.00651112676535075
S35-A07	7_3_2	Unknown	1	Fgf4	Test	11.7700013601156	807.012308412415	1	Pass	0.00585753619118968
S35-A08	7_3_2	Unknown	1	dnmt3aa	Test	10.1415525833858	61.5716112902937	1	Pass	0.00720457938855895
S35-A09	7_3_2	Unknown	1	foxo3a	Test	9.46908480183752	26.9248788121329	1	Pass	0.00894309864058025
S35-A10	7_3_2	Unknown	1	kdm2aa	Test	9.30754521945518	67.5673243874874	1	Pass	0.00799264174920814
S35-A11	7_3_2	Unknown	1	ogt.1	Test	10.3315599976149	37.8705317619653	1	Pass	0.00580787823573391
S35-A12	7_3_2	Unknown	1	tert	Test	12.8541976582388	396.783179033258	1	Pass	0.00846945269463405
S35-A13	7_3_2	Unknown	1	Aldh1a2	Test	9.58337392981277	184.370646372177	1	Pass	0.00632939983004382
S35-A14	7_3_2	Unknown	1	dnmt3ab	Test	9.71884629591477	42.4606730693158	1	Pass	0.00931843179675896
S35-A15	7_3_2	Unknown	1	gadd45aa	Test	9.51123948366087	250.486749879928	1	Pass	0.00880831281487657
S35-A16	7_3_2	Unknown	1	kdm4b/jmjd2b	Test	9.89305817569086	55.5456567690848	1	Pass	0.00927896985905001
S35-A17	7_3_2	Unknown	1	pou5f3	Test	15.0272368622533	-1	0.830895655534937	Pass	0.00450652254380955
S35-A18	7_3_2	Unknown	1	tet3	Test	9.58298141560102	58.9761768315633	1	Pass	0.00750583387196605
S35-A19	7_3_2	Unknown	1	Axin2	Test	10.2844802149503	40.4369061652029	0.944193384187038	Pass	0.00461906985014386
S35-A20	7_3_2	Unknown	1	dnmt3ba	Test	10.8765657542324	93.8074528997994	1	Pass	0.00597259676966606
S35-A21	7_3_2	Unknown	1	gadd45ab	Test	9.65986645551592	63.3577040028349	1	Pass	0.00665105353454544
S35-A22	7_3_2	Unknown	1	lats1	Test	10.9120769653306	38.2942967521053	1	Pass	0.00662357811419632
S35-A23	7_3_2	Unknown	1	Rarab	Test	9.58715992013743	80.4191186348472	1	Pass	0.00787731352009684
S35-A24	7_3_2	Unknown	1	ved	Test	14.5658231639398	20.1221183735727	0.912659185751956	Pass	0.00621567465591404
S35-A25	7_3_2	Unknown	1	cdkn2c	Test	13.331396332615	134.001466680462	1	Pass	0.00783619584131053
S35-A26	7_3_2	Unknown	1	dnmt3bb.1	Test	10.5566857879647	262.08730339112	1	Pass	0.00423247310552466
S35-A27	7_3_2	Unknown	1	hdac1	Test	8.41206578961221	109.300911418022	0.958994312876158	Pass	0.00482340564875717
S35-A28	7_3_2	Unknown	1	lin28a	Test	11.9273369702865	586.64574175128	1	Pass	0.00685732601660462
S35-A29	7_3_2	Unknown	1	Rpl13a1	Test	4.77336027338189	56.577483695464	0.924453424460629	Pass	0.0103523231385501
S35-A30	7_3_2	Unknown	1	vent
S35-A31	7_3_2	Unknown	1	Crabp1b	Test	10.884205012504	177.232231571581	1	Pass	0.00704322330326988
S35-A32	7_3_2	Unknown	1	Dusp6	Test	6.59899706958249	122.037896717441	1	Pass	0.0114011679183338
S35-A33	7_3_2	Unknown	1	Ifg1rb	Test	9.70415509816161	68.409025709714	1	Pass	0.00843121681178218
S35-A34	7_3_2	Unknown	1	mycb	Test	9.64999081438401	59.9940148936707	1	Pass	0.00834510025919904
S35-A35	7_3_2	Unknown	1	Rpl13a2	Test	4.47582319515065	57.5226702006059	0.794553190984017	Pass	0.00967061280246088
S35-A36	7_3_2	Unknown	1	vox	Test	14.9199326358368	68.1913040299441	1	Pass	0.00881965691216683
S35-A37	7_3_2	Unknown	1	Crabp2a	Test	9.93370638717015	113.48519651859	1	Pass	0.00685417042127909
S35-A38	7_3_2	Unknown	1	ezh2	Test	10.9358632807067	144.844717715233	1	Pass	0.00764759834232412
S35-A39	7_3_2	Unknown	1	Igf1	Test	14.0153028141057	55.3171091851708	0.996032703109593	Pass	0.0083332072578722
S35-A40	7_3_2	Unknown	1	mycla	Test	11.9270474212223	69.7376339248653	1	Pass	0.0127686116084135
S35-A41	7_3_2	Unknown	1	sall4	Test	11.0837675942355	166.641535056312	0.889873671082413	Pass	0.00681715441030155
S35-A42	7_3_2	Unknown	1	xpc	Test	12.309064336268	17.599075526248	0.969846905169043	Pass	0.00548824355156608
S35-A43	7_3_2	Unknown	1	Cyp26a1	Test	11.7448343680529	107.3321396768	1	Pass	0.00883074677869744
S35-A44	7_3_2	Unknown	1	Fgf8a
S35-A45	7_3_2	Unknown	1	Igf1ra	Test	9.58157688807384	64.8397890864144	1	Pass	0.00648470647509694
S35-A46	7_3_2	Unknown	1	nanog	Test	14.6882759281758	0.00562436909352093	1	Pass	0.0080293555926136
S35-A47	7_3_2	Unknown	1	spop	Test	10.3534210248432	42.2894358455736	0.962560409670323	Pass	0.00683061453397148
S35-A48	7_3_2	Unknown	1	yap1	Test	8.81121778004731	156.983120902911	0.953889231721166	Pass	0.00384749366749803
S41-A01	7_3_3	Unknown	1	actb1	Test	7.48555567977899	33.8942262534387	0.872905701561451	Pass	0.00515123486432751
S41-A02	7_3_3	Unknown	1	dnmt1	Test	11.8932051436326	21.1977027537006	1	Pass	0.00838036413701631
S41-A03	7_3_3	Unknown	1	Fgfr4	Test	14.2306877573235	8.11442477882212	1	Pass	0.00765676153628628
S41-A04	7_3_3	Unknown	1	jmjd6	Test	13.7342427058926	7.61985707426881	1	Pass	0.0067923511426121
S41-A05	7_3_3	Unknown	1	neil1	Test	13.7146806112861	3.91935115300273	1	Pass	0.0078521262809567
S41-A06	7_3_3	Unknown	1	tdg.1	Test	12.8711683504776	12.969025324848	0.966207667622259	Pass	0.00651112676535075
S41-A07	7_3_3	Unknown	1	Fgf4	Test	15.1990711334674	25.4033746949269	0.955675291209972	Pass	0.00585753619118968
S41-A08	7_3_3	Unknown	1	dnmt3aa	Test	13.8088055607717	7.15962438062799	1	Pass	0.00720457938855895
S41-A09	7_3_3	Unknown	1	foxo3a	Test	12.3067818128329	3.49949412509059	0.998736247205047	Pass	0.00894309864058025
S41-A10	7_3_3	Unknown	1	kdm2aa	Test	12.9958300038106	5.05207879293315	1	Pass	0.00799264174920814
S41-A11	7_3_3	Unknown	1	ogt.1	Test	12.5797997615948	9.1898148958659	1	Pass	0.00580787823573391
S41-A12	7_3_3	Unknown	1	tert	Test	15.7097020800067	34.9990026866779	1	Pass	0.00846945269463405
S41-A13	7_3_3	Unknown	1	Aldh1a2	Test	12.3683003442654	24.0832110018244	0.972670276198004	Pass	0.00632939983004382
S41-A14	7_3_3	Unknown	1	dnmt3ab	Test	12.4673431080611	5.67318129791987	1	Pass	0.00931843179675896
S41-A15	7_3_3	Unknown	1	gadd45aa	Test	12.6640701162899	20.8237554077606	1	Pass	0.00880831281487657
S41-A16	7_3_3	Unknown	1	kdm4b/jmjd2b	Test	13.7889443943701	4.56954511901722	1	Pass	0.00927896985905001
S41-A17	7_3_3	Unknown	1	pou5f3	Test	18.778232403244	-1	0.954254249247257	Pass	0.00450652254380955
S41-A18	7_3_3	Unknown	1	tet3	Test	13.3481382065278	4.36874326669527	1	Pass	0.00750583387196605
S41-A19	7_3_3	Unknown	1	Axin2	Test	13.8826534908384	5.97359468885468	1	Pass	0.00461906985014386
S41-A20	7_3_3	Unknown	1	dnmt3ba	Test	14.0237254033359	11.4532517906691	0.954872300736143	Pass	0.00597259676966606
S41-A21	7_3_3	Unknown	1	gadd45ab	Test	12.6100762623448	5.7622233547541	1	Pass	0.00665105353454544
S41-A22	7_3_3	Unknown	1	lats1	Test	14.4387670339311	3.88466784920077	1	Pass	0.00662357811419632
S41-A23	7_3_3	Unknown	1	Rarab	Test	13.363376666982	5.01040570707744	1	Pass	0.00787731352009684
S41-A24	7_3_3	Unknown	1	ved	Test	18.7138218817094	1.12469478767626	0.860041085206597	Pass	0.00621567465591404
S41-A25	7_3_3	Unknown	1	cdkn2c	Test	15.6998912845037	20.5531072288098	1	Pass	0.00783619584131053
S41-A26	7_3_3	Unknown	1	dnmt3bb.1	Test	14.1518965691215	16.0427562557524	0.960449243035053	Pass	0.00423247310552466
S41-A27	7_3_3	Unknown	1	hdac1	Test	11.5332946827591	14.4651814974464	0.976688758378972	Pass	0.00482340564875717
S41-A28	7_3_3	Unknown	1	lin28a	Test	15.4261419613314	28.9522412504866	1	Pass	0.00685732601660462
S41-A29	7_3_3	Unknown	1	Rpl13a1	Test	7.30963671643827	8.23619309089731	0.922216434405485	Pass	0.0103523231385501
S41-A30	7_3_3	Unknown	1	vent
S41-A31	7_3_3	Unknown	1	Crabp1b	Test	14.1645429856637	24.5339919908095	0.957494637480307	Pass	0.00704322330326988
S41-A32	7_3_3	Unknown	1	Dusp6	Test	10.1524836429068	9.40494137105825	1	Pass	0.0114011679183338
S41-A33	7_3_3	Unknown	1	Ifg1rb	Test	13.2168846385883	5.66000908455265	1	Pass	0.00843121681178218
S41-A34	7_3_3	Unknown	1	mycb	Test	12.3805393359806	8.00992710714115	1	Pass	0.00834510025919904
S41-A35	7_3_3	Unknown	1	Rpl13a2	Test	6.79383405151987	9.60166035438295	0.991185427552452	Pass	0.00967061280246088
S41-A36	7_3_3	Unknown	1	vox	Test	999	-1	0	Fail	0.00881965691216683
S41-A37	7_3_3	Unknown	1	Crabp2a	Test	13.7823488532835	10.0386052751048	1	Pass	0.00685417042127909
S41-A38	7_3_3	Unknown	1	ezh2	Test	13.8961724814976	19.8554721499904	1	Pass	0.00764759834232412
S41-A39	7_3_3	Unknown	1	Igf1	Test	18.7593428392891	2.1896664906809	1	Pass	0.0083332072578722
S41-A40	7_3_3	Unknown	1	mycla	Test	14.6542381000999	11.6479117618533	1	Pass	0.0127686116084135
S41-A41	7_3_3	Unknown	1	sall4	Test	15.4202220254642	13.3367060665684	0.912388981901233	Pass	0.00681715441030155
S41-A42	7_3_3	Unknown	1	xpc	Test	15.1781593317303	2.35133281236429	0.940136317592376	Pass	0.00548824355156608
S41-A43	7_3_3	Unknown	1	Cyp26a1	Test	15.8885218301846	5.27387731672344	1	Pass	0.00883074677869744
S41-A44	7_3_3	Unknown	1	Fgf8a
S41-A45	7_3_3	Unknown	1	Igf1ra	Test	12.8162103775225	5.87180576343113	1	Pass	0.00648470647509694
S41-A46	7_3_3	Unknown	1	nanog	Test	18.4338186519326	816.660514045873	0.976773665169543	Pass	0.0080293555926136
S41-A47	7_3_3	Unknown	1	spop	Test	13.2233635043667	5.07983084283934	0.934994464516069	Pass	0.00683061453397148
S41-A48	7_3_3	Unknown	1	yap1	Test	11.8421304578967	17.5644775129643	0.930504617729578	Pass	0.00384749366749803
S47-A01	7_3_4	Unknown	1	actb1	Test	4.86908349323816	214.970733302928	0.950133867268824	Pass	0.00515123486432751
S47-A02	7_3_4	Unknown	1	dnmt1	Test	10.1699798722121	55.5194771817621	1	Pass	0.00838036413701631
S47-A03	7_3_4	Unknown	1	Fgfr4	Test	10.6496182752946	63.5456483900373	1	Pass	0.00765676153628628
S47-A04	7_3_4	Unknown	1	jmjd6	Test	10.4462594363105	49.0493549112458	1	Pass	0.0067923511426121
S47-A05	7_3_4	Unknown	1	neil1	Test	10.981995162161	28.6683896845017	1	Pass	0.0078521262809567
S47-A06	7_3_4	Unknown	1	tdg.1	Test	10.6934636802447	72.0117042625938	0.934553509635707	Pass	0.00651112676535075
S47-A07	7_3_4	Unknown	1	Fgf4	Test	13.0728974300998	216.865432415219	0.94010846073563	Pass	0.00585753619118968
S47-A08	7_3_4	Unknown	1	dnmt3aa	Test	10.9918433222436	37.386019618757	1	Pass	0.00720457938855895
S47-A09	7_3_4	Unknown	1	foxo3a	Test	9.47446611114575	26.8208968711581	1	Pass	0.00894309864058025
S47-A10	7_3_4	Unknown	1	kdm2aa	Test	9.98541807315216	41.9507054090544	1	Pass	0.00799264174920814
S47-A11	7_3_4	Unknown	1	ogt.1	Test	10.8153849682054	27.9224501792456	1	Pass	0.00580787823573391
S47-A12	7_3_4	Unknown	1	tert	Test	13.7977231750298	177.878132866462	1	Pass	0.00846945269463405
S47-A13	7_3_4	Unknown	1	Aldh1a2	Test	9.778382947431	159.879577915061	1	Pass	0.00632939983004382
S47-A14	7_3_4	Unknown	1	dnmt3ab	Test	10.3057363370687	27.6265291325248	1	Pass	0.00931843179675896
S47-A15	7_3_4	Unknown	1	gadd45aa	Test	9.78149789989172	202.389777491663	1	Pass	0.00880831281487657
S47-A16	7_3_4	Unknown	1	kdm4b/jmjd2b	Test	9.88016566845319	56.0066914323326	1	Pass	0.00927896985905001
S47-A17	7_3_4	Unknown	1	pou5f3	Test	14.7933249582148	-1	0.965909272285431	Pass	0.00450652254380955
S47-A18	7_3_4	Unknown	1	tet3	Test	10.2610035950758	36.9088702214222	1	Pass	0.00750583387196605
S47-A19	7_3_4	Unknown	1	Axin2	Test	10.6985087758238	32.4496852454584	0.980342727966744	Pass	0.00461906985014386
S47-A20	7_3_4	Unknown	1	dnmt3ba	Test	11.7063600938247	53.8803349593064	1	Pass	0.00597259676966606
S47-A21	7_3_4	Unknown	1	gadd45ab	Test	10.0740346672464	45.2510015005469	1	Pass	0.00665105353454544
S47-A22	7_3_4	Unknown	1	lats1	Test	11.0556326827852	34.8884574734526	1	Pass	0.00662357811419632
S47-A23	7_3_4	Unknown	1	Rarab	Test	10.2435204286581	49.6396281378469	1	Pass	0.00787731352009684
S47-A24	7_3_4	Unknown	1	ved	Test	15.553070026208	10.128348054736	0.943296217368901	Pass	0.00621567465591404
S47-A25	7_3_4	Unknown	1	cdkn2c	Test	14.2022403943521	67.2564805520455	1	Pass	0.00783619584131053
S47-A26	7_3_4	Unknown	1	dnmt3bb.1	Test	11.3888231237382	137.293436212721	1	Pass	0.00423247310552466
S47-A27	7_3_4	Unknown	1	hdac1	Test	9.05582546327257	72.0232444200005	0.924512387968943	Pass	0.00482340564875717
S47-A28	7_3_4	Unknown	1	lin28a	Test	11.8644482118202	619.245555180221	1	Pass	0.00685732601660462
S47-A29	7_3_4	Unknown	1	Rpl13a1	Test	5.11656674848565	43.5905967531501	0.916644436558863	Pass	0.0103523231385501
S47-A30	7_3_4	Unknown	1	vent
S47-A31	7_3_4	Unknown	1	Crabp1b	Test	12.0421311446242	88.1868837748658	0.964692655235988	Pass	0.00704322330326988
S47-A32	7_3_4	Unknown	1	Dusp6	Test	6.86395524936043	100.808208494204	1	Pass	0.0114011679183338
S47-A33	7_3_4	Unknown	1	Ifg1rb	Test	9.91979466710678	58.7047660886714	1	Pass	0.00843121681178218
S47-A34	7_3_4	Unknown	1	mycb	Test	9.75852264808883	55.3795935834654	1	Pass	0.00834510025919904
S47-A35	7_3_4	Unknown	1	Rpl13a2	Test	4.74062987011966	46.8834151491368	0.913543290039886	Pass	0.00967061280246088
S47-A36	7_3_4	Unknown	1	vox	Test	16.0923441719472	26.453812674791	0.999991882111886	Pass	0.00881965691216683
S47-A37	7_3_4	Unknown	1	Crabp2a	Test	11.0702061601755	55.4512068078807	1	Pass	0.00685417042127909
S47-A38	7_3_4	Unknown	1	ezh2	Test	11.8692577427655	77.4085745411408	1	Pass	0.00764759834232412
S47-A39	7_3_4	Unknown	1	Igf1	Test	14.7791740267772	32.8878949428095	1	Pass	0.0083332072578722
S47-A40	7_3_4	Unknown	1	mycla	Test	12.5017105351004	47.8293618106259	1	Pass	0.0127686116084135
S47-A41	7_3_4	Unknown	1	sall4	Test	10.8003332927418	196.547152662248	0.994012657497081	Pass	0.00681715441030155
S47-A42	7_3_4	Unknown	1	xpc	Test	12.1500492430565	19.6761296656057	0.937004003366048	Pass	0.00548824355156608
S47-A43	7_3_4	Unknown	1	Cyp26a1	Test	10.9865323753223	186.296979580203	1	Pass	0.00883074677869744
S47-A44	7_3_4	Unknown	1	Fgf8a
S47-A45	7_3_4	Unknown	1	Igf1ra	Test	9.80101002906424	55.0910624342741	1	Pass	0.00648470647509694
S47-A46	7_3_4	Unknown	1	nanog	Test	15.6881517878367	0.134296765634506	1	Pass	0.0080293555926136
S47-A47	7_3_4	Unknown	1	spop	Test	10.6952040417554	32.8566302367877	1	Pass	0.00683061453397148
S47-A48	7_3_4	Unknown	1	yap1	Test	9.11179392790062	126.334081871368	0.897819741741016	Pass	0.00384749366749803
S06-A01	7_3_5	Unknown	1	actb1	Test	9.44341049552782	8.50775707807961	0.868425321950214	Pass	0.00515123486432751
S06-A02	7_3_5	Unknown	1	dnmt1	Test	14.3309211790745	5.42943236862831	1	Pass	0.00838036413701631
S06-A03	7_3_5	Unknown	1	Fgfr4	Test	16.1326640965065	2.71974439918003	0.988583390362236	Pass	0.00765676153628628
S06-A04	7_3_5	Unknown	1	jmjd6	Test	14.6285654959648	4.59183457702516	1	Pass	0.0067923511426121
S06-A05	7_3_5	Unknown	1	neil1	Test	15.6538838562435	0.954898525122017	1	Pass	0.0078521262809567
S06-A06	7_3_5	Unknown	1	tdg.1	Test	15.014457923743	2.39981154048828	0.877708840417578	Pass	0.00651112676535075
S06-A07	7_3_5	Unknown	1	Fgf4	Test	18.2667833222136	1.15128597003075	0.967955963654651	Pass	0.00585753619118968
S06-A08	7_3_5	Unknown	1	dnmt3aa	Test	17.6920819727965	0.733420110671505	1	Pass	0.00720457938855895
S06-A09	7_3_5	Unknown	1	foxo3a	Test	17.4225795979454	0.0884010694353215	0.972274283792211	Pass	0.00894309864058025
S06-A10	7_3_5	Unknown	1	kdm2aa	Test	14.4657059396623	1.7973143066123	1	Pass	0.00799264174920814
S06-A11	7_3_5	Unknown	1	ogt.1	Test	15.8805157356666	1.14924485793181	1	Pass	0.00580787823573391
S06-A12	7_3_5	Unknown	1	tert	Test	17.4032635012032	8.29177059160602	1	Pass	0.00846945269463405
S06-A13	7_3_5	Unknown	1	Aldh1a2	Test	17.6379155489847	0.511751987265724	1	Pass	0.00632939983004382
S06-A14	7_3_5	Unknown	1	dnmt3ab	Test	14.1003731571065	1.71569853258801	1	Pass	0.00931843179675896
S06-A15	7_3_5	Unknown	1	gadd45aa	Test	13.0115039314558	15.831459844357	1	Pass	0.00880831281487657
S06-A16	7_3_5	Unknown	1	kdm4b/jmjd2b	Test	14.9145882609125	2.22047961831094	1	Pass	0.00927896985905001
S06-A17	7_3_5	Unknown	1	pou5f3	Test	25.2064939054869	-1	0.939409699217729	Pass	0.00450652254380955
S06-A18	7_3_5	Unknown	1	tet3	Test	15.2687359277768	1.15819816883668	1	Pass	0.00750583387196605
S06-A19	7_3_5	Unknown	1	Axin2	Test	16.0961357093796	1.84209710411726	0.968170322500063	Pass	0.00461906985014386
S06-A20	7_3_5	Unknown	1	dnmt3ba	Test	15.9491014289527	3.16361021772649	1	Pass	0.00597259676966606
S06-A21	7_3_5	Unknown	1	gadd45ab	Test	13.4662689257796	2.87353434859733	1	Pass	0.00665105353454544
S06-A22	7_3_5	Unknown	1	lats1	Test	15.4060505275304	2.07388496384359	1	Pass	0.00662357811419632
S06-A23	7_3_5	Unknown	1	Rarab	Test	15.9081049432584	0.771820108308111	1	Pass	0.00787731352009684
S06-A24	7_3_5	Unknown	1	ved	Test	16.4920331561871	5.27211121672718	0.934715549986405	Pass	0.00621567465591404
S06-A25	7_3_5	Unknown	1	cdkn2c	Test	17.8672292720443	3.69656536378993	1	Pass	0.00783619584131053
S06-A26	7_3_5	Unknown	1	dnmt3bb.1	Test	14.168508222727	15.8370232038097	0.985206099493502	Pass	0.00423247310552466
S06-A27	7_3_5	Unknown	1	hdac1	Test	13.0498236830378	5.41476218356011	0.94735730822455	Pass	0.00482340564875717
S06-A28	7_3_5	Unknown	1	lin28a	Test	18.1725635407387	2.72885223777621	1	Pass	0.00685732601660462
S06-A29	7_3_5	Unknown	1	Rpl13a1	Test	9.05346912407656	2.18926852996681	0.906002359207179	Pass	0.0103523231385501
S06-A30	7_3_5	Unknown	1	vent
S06-A31	7_3_5	Unknown	1	Crabp1b	Test	18.1471973876026	2.22398136590908	0.979472931971838	Pass	0.00704322330326988
S06-A32	7_3_5	Unknown	1	Dusp6	Test	10.755120468679	6.08945728815448	1	Pass	0.0114011679183338
S06-A33	7_3_5	Unknown	1	Ifg1rb	Test	15.325357196002	1.26818363378805	1	Pass	0.00843121681178218
S06-A34	7_3_5	Unknown	1	mycb	Test	16.2461288146158	0.463066669732967	1	Pass	0.00834510025919904
S06-A35	7_3_5	Unknown	1	Rpl13a2	Test	8.73740357903678	2.14016081756267	1	Pass	0.00967061280246088
S06-A36	7_3_5	Unknown	1	vox	Test	999	-1	0	Fail	0.00881965691216683
S06-A37	7_3_5	Unknown	1	Crabp2a	Test	14.0042560963948	8.72857945969251	1	Pass	0.00685417042127909
S06-A38	7_3_5	Unknown	1	ezh2	Test	14.9572712057329	9.73950427474729	1	Pass	0.00764759834232412
S06-A39	7_3_5	Unknown	1	Igf1	Test	19.7570781156526	1.11024107947947	1	Pass	0.0083332072578722
S06-A40	7_3_5	Unknown	1	mycla	Test	15.5960719641903	6.27821020807217	1	Pass	0.0127686116084135
S06-A41	7_3_5	Unknown	1	sall4	Test	17.7073911251378	3.52046146033613	0.998346724659668	Pass	0.00681715441030155
S06-A42	7_3_5	Unknown	1	xpc	Test	16.7155551042561	0.799631149748909	1	Pass	0.00548824355156608
S06-A43	7_3_5	Unknown	1	Cyp26a1	Test	13.4922962211989	30.1211482217775	1	Pass	0.00883074677869744
S06-A44	7_3_5	Unknown	1	Fgf8a
S06-A45	7_3_5	Unknown	1	Igf1ra	Test	14.5896187748081	1.57362759500184	1	Pass	0.00648470647509694
S06-A46	7_3_5	Unknown	1	nanog	Test	19.1474335060959	7861.74624201476	0.995261396535683	Pass	0.0080293555926136
S06-A47	7_3_5	Unknown	1	spop	Test	14.8482004615399	1.53027159888458	1	Pass	0.00683061453397148
S06-A48	7_3_5	Unknown	1	yap1	Test	12.6870606478601	9.53813434126051	0.98074979044276	Pass	0.00384749366749803
S23-A01	7_3_L	Unknown	1	actb1	Test	5.71179620829019	118.574060508382	0.935211983955281	Pass	0.00515123486432751
S23-A02	7_3_L	Unknown	1	dnmt1	Test	10.0362939844699	59.8253828339272	0.99630172704102	Pass	0.00838036413701631
S23-A03	7_3_L	Unknown	1	Fgfr4	Test	10.3513419692855	75.4284198001781	1	Pass	0.00765676153628628
S23-A04	7_3_L	Unknown	1	jmjd6	Test	10.5003586468051	47.5693792469036	1	Pass	0.0067923511426121
S23-A05	7_3_L	Unknown	1	neil1	Test	11.1023752725216	26.2623803621237	1	Pass	0.0078521262809567
S23-A06	7_3_L	Unknown	1	tdg.1	Test	10.4216184355235	89.194752416773	0.922450501915667	Pass	0.00651112676535075
S23-A07	7_3_L	Unknown	1	Fgf4	Test	12.7620326224467	296.725049975301	1	Pass	0.00585753619118968
S23-A08	7_3_L	Unknown	1	dnmt3aa	Test	10.2992357144811	56.1305975709975	1	Pass	0.00720457938855895
S23-A09	7_3_L	Unknown	1	foxo3a	Test	8.89151960740159	40.7862975000198	1	Pass	0.00894309864058025
S23-A10	7_3_L	Unknown	1	kdm2aa	Test	9.38701449039103	63.8954197021508	1	Pass	0.00799264174920814
S23-A11	7_3_L	Unknown	1	ogt.1	Test	9.37424594589388	69.2101563274878	1	Pass	0.00580787823573391
S23-A12	7_3_L	Unknown	1	tert	Test	14.0951665390852	138.127742885428	0.941890115707436	Pass	0.00846945269463405
S23-A13	7_3_L	Unknown	1	Aldh1a2	Test	10.3819758973081	102.849821767369	0.968013324721306	Pass	0.00632939983004382
S23-A14	7_3_L	Unknown	1	dnmt3ab	Test	9.10765861452763	66.4316889796013	0.988029032497655	Pass	0.00931843179675896
S23-A15	7_3_L	Unknown	1	gadd45aa	Test	9.51862886172076	249.030764761816	1	Pass	0.00880831281487657
S23-A16	7_3_L	Unknown	1	kdm4b/jmjd2b	Test	10.067031584465	49.6830966280615	0.993941408641266	Pass	0.00927896985905001
S23-A17	7_3_L	Unknown	1	pou5f3	Test	18.4415396450799	-1	0.865257215786787	Pass	0.00450652254380955
S23-A18	7_3_L	Unknown	1	tet3	Test	9.40390190832779	66.7478430607466	1	Pass	0.00750583387196605
S23-A19	7_3_L	Unknown	1	Axin2	Test	10.2127566854315	42.0081330491641	0.931603560128092	Pass	0.00461906985014386
S23-A20	7_3_L	Unknown	1	dnmt3ba	Test	11.4720335348453	63.0132766507903	0.999545712614808	Pass	0.00597259676966606
S23-A21	7_3_L	Unknown	1	gadd45ab	Test	9.75303095486566	58.7379983829852	1	Pass	0.00665105353454544
S23-A22	7_3_L	Unknown	1	lats1	Test	10.5440403790885	48.62308656194	1	Pass	0.00662357811419632
S23-A23	7_3_L	Unknown	1	Rarab	Test	9.91433197382885	63.2289199430285	1	Pass	0.00787731352009684
S23-A24	7_3_L	Unknown	1	ved	Test	14.0950704712999	27.9148044401209	0.869752407124597	Pass	0.00621567465591404
S23-A25	7_3_L	Unknown	1	cdkn2c	Test	13.2075164140716	147.807514035111	0.986300165316496	Pass	0.00783619584131053
S23-A26	7_3_L	Unknown	1	dnmt3bb.1	Test	11.349066728703	141.600622456278	0.962157718280025	Pass	0.00423247310552466
S23-A27	7_3_L	Unknown	1	hdac1	Test	8.63982067189043	94.3049686060615	0.967639459443262	Pass	0.00482340564875717
S23-A28	7_3_L	Unknown	1	lin28a	Test	13.8074747386616	116.467174345828	1	Pass	0.00685732601660462
S23-A29	7_3_L	Unknown	1	Rpl13a1	Test	4.75426139801504	57.4044882296229	0.918087132671681	Pass	0.0103523231385501
S23-A30	7_3_L	Unknown	1	vent
S23-A31	7_3_L	Unknown	1	Crabp1b	Test	11.8848656214136	96.9561244937823	1	Pass	0.00704322330326988
S23-A32	7_3_L	Unknown	1	Dusp6	Test	7.07474277083164	86.5896879671333	0.992677385063166	Pass	0.0114011679183338
S23-A33	7_3_L	Unknown	1	Ifg1rb	Test	9.62593549876895	72.3125047769869	1	Pass	0.00843121681178218
S23-A34	7_3_L	Unknown	1	mycb	Test	9.25024565743896	80.5618473731527	1	Pass	0.00834510025919904
S23-A35	7_3_L	Unknown	1	Rpl13a2	Test	4.41519012385628	60.280410786458	0.758714720064484	Pass	0.00967061280246088
S23-A36	7_3_L	Unknown	1	vox	Test	16.8353943632085	14.5161820834659	1	Pass	0.00881965691216683
S23-A37	7_3_L	Unknown	1	Crabp2a	Test	10.1401570141672	99.6413148374338	1	Pass	0.00685417042127909
S23-A38	7_3_L	Unknown	1	ezh2	Test	11.0690821003929	132.454043756506	1	Pass	0.00764759834232412
S23-A39	7_3_L	Unknown	1	Igf1	Test	13.6290032064747	71.9550545428295	1	Pass	0.0083332072578722
S23-A40	7_3_L	Unknown	1	mycla	Test	12.1009144241498	62.2181420902938	0.973135739980229	Pass	0.0127686116084135
S23-A41	7_3_L	Unknown	1	sall4	Test	12.4121362153513	76.8820474818544	0.945114627904949	Pass	0.00681715441030155
S23-A42	7_3_L	Unknown	1	xpc	Test	11.8254086468752	24.7089006414289	1	Pass	0.00548824355156608
S23-A43	7_3_L	Unknown	1	Cyp26a1	Test	11.67948145126	112.555988176761	1	Pass	0.00883074677869744
S23-A44	7_3_L	Unknown	1	Fgf8a
S23-A45	7_3_L	Unknown	1	Igf1ra	Test	9.5737417956666	65.2181041598609	1	Pass	0.00648470647509694
S23-A46	7_3_L	Unknown	1	nanog	Test	17.071886100424	10.8411847092917	0.938966177309451	Pass	0.0080293555926136
S23-A47	7_3_L	Unknown	1	spop	Test	9.93153539213502	57.7470031423459	1	Pass	0.00683061453397148
S23-A48	7_3_L	Unknown	1	yap1	Test	9.01368363928155	135.61612620388	0.837615280223878	Pass	0.00384749366749803
S17-A01	7_3_S	Unknown	1	actb1	Test	4.35291395628372	309.489164423015	0.654244808548513	Pass	0.00515123486432751
S17-A02	7_3_S	Unknown	1	dnmt1	Test	9.04245621600615	104.243605560375	1	Pass	0.00838036413701631
S17-A03	7_3_S	Unknown	1	Fgfr4	Test	9.94494722862768	95.2731133898797	1	Pass	0.00765676153628628
S17-A04	7_3_S	Unknown	1	jmjd6	Test	9.76870762390296	71.9910666935639	1	Pass	0.0067923511426121
S17-A05	7_3_S	Unknown	1	neil1	Test	9.90594352833505	62.7618460819761	1	Pass	0.0078521262809567
S17-A06	7_3_S	Unknown	1	tdg.1	Test	10.2358263953262	103.241987864321	0.880513746609582	Pass	0.00651112676535075
S17-A07	7_3_S	Unknown	1	Fgf4	Test	12.4866785185732	391.709244061008	0.977891580670129	Pass	0.00585753619118968
S17-A08	7_3_S	Unknown	1	dnmt3aa	Test	10.2819107741728	56.7040933991189	1	Pass	0.00720457938855895
S17-A09	7_3_S	Unknown	1	foxo3a	Test	9.49091762032397	26.5054915451018	1	Pass	0.00894309864058025
S17-A10	7_3_S	Unknown	1	kdm2aa	Test	9.16265869619595	74.8134599442077	1	Pass	0.00799264174920814
S17-A11	7_3_S	Unknown	1	ogt.1	Test	9.79064492388187	53.2434258430289	1	Pass	0.00580787823573391
S17-A12	7_3_S	Unknown	1	tert	Test	12.8325949592386	404.139058424882	1	Pass	0.00846945269463405
S17-A13	7_3_S	Unknown	1	Aldh1a2	Test	9.20457091104717	243.180940820848	0.948054808903514	Pass	0.00632939983004382
S17-A14	7_3_S	Unknown	1	dnmt3ab	Test	9.58359371205439	46.8817697756871	1	Pass	0.00931843179675896
S17-A15	7_3_S	Unknown	1	gadd45aa	Test	9.40793840514329	271.755202723172	1	Pass	0.00880831281487657
S17-A16	7_3_S	Unknown	1	kdm4b/jmjd2b	Test	10.3408040207337	41.6849223813974	1	Pass	0.00927896985905001
S17-A17	7_3_S	Unknown	1	pou5f3	Test	14.4962240507235	-1	0.90195010044916	Pass	0.00450652254380955
S17-A18	7_3_S	Unknown	1	tet3	Test	9.81884317265965	50.103684262245	1	Pass	0.00750583387196605
S17-A19	7_3_S	Unknown	1	Axin2	Test	9.47434761437109	62.1978520142557	1	Pass	0.00461906985014386
S17-A20	7_3_S	Unknown	1	dnmt3ba	Test	11.0469720836769	83.7115291604545	0.948388109371963	Pass	0.00597259676966606
S17-A21	7_3_S	Unknown	1	gadd45ab	Test	9.46353816021995	74.3171471585124	1	Pass	0.00665105353454544
S17-A22	7_3_S	Unknown	1	lats1	Test	10.9317595724734	37.8083538468529	1	Pass	0.00662357811419632
S17-A23	7_3_S	Unknown	1	Rarab	Test	9.70171641958839	73.9246528667417	1	Pass	0.00787731352009684
S17-A24	7_3_S	Unknown	1	ved	Test	13.7439888759232	35.6333325808974	0.941126434239681	Pass	0.00621567465591404
S17-A25	7_3_S	Unknown	1	cdkn2c	Test	13.0004433677695	174.133883732925	0.952131524502284	Pass	0.00783619584131053
S17-A26	7_3_S	Unknown	1	dnmt3bb.1	Test	10.5298350330191	267.61256103388	1	Pass	0.00423247310552466
S17-A27	7_3_S	Unknown	1	hdac1	Test	8.34848920841666	113.897436610359	0.940690380024416	Pass	0.00482340564875717
S17-A28	7_3_S	Unknown	1	lin28a	Test	11.6159018122091	766.808942666551	1	Pass	0.00685732601660462
S17-A29	7_3_S	Unknown	1	Rpl13a1	Test	4.61017936725271	64.0456806181872	0.861609169903861	Pass	0.0103523231385501
S17-A30	7_3_S	Unknown	1	vent
S17-A31	7_3_S	Unknown	1	Crabp1b	Test	11.4887120338974	123.107945533054	1	Pass	0.00704322330326988
S17-A32	7_3_S	Unknown	1	Dusp6	Test	6.55066436746794	126.367401400405	1	Pass	0.0114011679183338
S17-A33	7_3_S	Unknown	1	Ifg1rb	Test	9.45490407433214	81.6411982547531	1	Pass	0.00843121681178218
S17-A34	7_3_S	Unknown	1	mycb	Test	9.08000529572274	91.3377300120099	1	Pass	0.00834510025919904
S17-A35	7_3_S	Unknown	1	Rpl13a2	Test	4.32807819804617	64.4755032056288	0.708092419131157	Pass	0.00967061280246088
S17-A36	7_3_S	Unknown	1	vox	Test	16.1832947142434	24.5802345819851	1	Pass	0.00881965691216683
S17-A37	7_3_S	Unknown	1	Crabp2a	Test	11.0329074468614	56.7699638003843	1	Pass	0.00685417042127909
S17-A38	7_3_S	Unknown	1	ezh2	Test	11.0563598263415	133.590065022121	1	Pass	0.00764759834232412
S17-A39	7_3_S	Unknown	1	Igf1	Test	14.1273783277063	51.25385898553	1	Pass	0.0083332072578722
S17-A40	7_3_S	Unknown	1	mycla	Test	11.8772519507628	72.0540449233046	1	Pass	0.0127686116084135
S17-A41	7_3_S	Unknown	1	sall4	Test	10.2016102127524	278.541612391716	0.916668057866705	Pass	0.00681715441030155
S17-A42	7_3_S	Unknown	1	xpc	Test	11.8236401620244	24.7395762881708	1	Pass	0.00548824355156608
S17-A43	7_3_S	Unknown	1	Cyp26a1	Test	10.4717038166063	270.889120394399	1	Pass	0.00883074677869744
S17-A44	7_3_S	Unknown	1	Fgf8a
S17-A45	7_3_S	Unknown	1	Igf1ra	Test	9.12420601855725	91.06041928497	0.943230999712034	Pass	0.00648470647509694
S17-A46	7_3_S	Unknown	1	nanog	Test	15.774681805166	0.176733145283941	1	Pass	0.0080293555926136
S17-A47	7_3_S	Unknown	1	spop	Test	9.73150859242842	66.9387339531139	0.982860668395591	Pass	0.00683061453397148
S17-A48	7_3_S	Unknown	1	yap1	Test	8.42654999851599	207.289163489923	0.903917169338582	Pass	0.00384749366749803
S12-A01	8_1	Unknown	1	actb1	Test	6.97839892563969	48.4873407863924	0.943696601773927	Pass	0.00515123486432751
S12-A02	8_1	Unknown	1	dnmt1	Test	10.3006227648615	51.6111647297451	1	Pass	0.00838036413701631
S12-A03	8_1	Unknown	1	Fgfr4	Test	10.6513283434759	63.483225657197	1	Pass	0.00765676153628628
S12-A04	8_1	Unknown	1	jmjd6	Test	10.5862686597964	45.3103830668227	1	Pass	0.0067923511426121
S12-A05	8_1	Unknown	1	neil1	Test	10.5799630937829	38.4186949805015	1	Pass	0.0078521262809567
S12-A06	8_1	Unknown	1	tdg.1	Test	10.8417029569692	64.0802600140621	0.941444577828168	Pass	0.00651112676535075
S12-A07	8_1	Unknown	1	Fgf4	Test	13.522896954783	137.747323062722	0.994916727642037	Pass	0.00585753619118968
S12-A08	8_1	Unknown	1	dnmt3aa	Test	10.3203132014197	55.4406987785634	1	Pass	0.00720457938855895
S12-A09	8_1	Unknown	1	foxo3a	Test	8.10727088999549	71.6832009274754	0.919685651923654	Pass	0.00894309864058025
S12-A10	8_1	Unknown	1	kdm2aa	Test	9.32929385344518	66.5419445576856	1	Pass	0.00799264174920814
S12-A11	8_1	Unknown	1	ogt.1	Test	8.87153486386306	94.9913170702484	1	Pass	0.00580787823573391
S12-A12	8_1	Unknown	1	tert	Test	15.5440310148408	40.2935619928466	0.986551418636606	Pass	0.00846945269463405
S12-A13	8_1	Unknown	1	Aldh1a2	Test	11.4111410484695	48.4764823533341	0.982261604682064	Pass	0.00632939983004382
S12-A14	8_1	Unknown	1	dnmt3ab	Test	9.10061018119341	66.7754849145331	0.983751380796529	Pass	0.00931843179675896
S12-A15	8_1	Unknown	1	gadd45aa	Test	10.6828399915885	99.3962327365717	1	Pass	0.00880831281487657
S12-A16	8_1	Unknown	1	kdm4b/jmjd2b	Test	9.59366083549338	67.2999601559007	1	Pass	0.00927896985905001
S12-A17	8_1	Unknown	1	pou5f3	Test	20.4197886597048	-1	0.851023012041095	Pass	0.00450652254380955
S12-A18	8_1	Unknown	1	tet3	Test	9.17967163305013	77.9385563735768	1	Pass	0.00750583387196605
S12-A19	8_1	Unknown	1	Axin2	Test	9.8718037119052	50.3539176675347	1	Pass	0.00461906985014386
S12-A20	8_1	Unknown	1	dnmt3ba	Test	11.5998424037667	57.8551222434077	1	Pass	0.00597259676966606
S12-A21	8_1	Unknown	1	gadd45ab	Test	9.86690274638541	53.5464505953217	1	Pass	0.00665105353454544
S12-A22	8_1	Unknown	1	lats1	Test	10.418937113322	52.734540733568	1	Pass	0.00662357811419632
S12-A23	8_1	Unknown	1	Rarab	Test	9.50216895830402	85.603413056461	1	Pass	0.00787731352009684
S12-A24	8_1	Unknown	1	ved	Test	13.5515909135378	40.7340883352951	0.913268927788941	Pass	0.00621567465591404
S12-A25	8_1	Unknown	1	cdkn2c	Test	14.1268632167308	71.3915831865184	0.97615335715118	Pass	0.00783619584131053
S12-A26	8_1	Unknown	1	dnmt3bb.1	Test	12.6664975877901	50.875844785428	1	Pass	0.00423247310552466
S12-A27	8_1	Unknown	1	hdac1	Test	9.28683894359184	62.0106833953775	0.933376032500415	Pass	0.00482340564875717
S12-A28	8_1	Unknown	1	lin28a	Test	14.8215527866747	48.6942016445968	1	Pass	0.00685732601660462
S12-A29	8_1	Unknown	1	Rpl13a1	Test	4.81421581401532	54.8481737255148	0.938071938005107	Pass	0.0103523231385501
S12-A30	8_1	Unknown	1	vent
S12-A31	8_1	Unknown	1	Crabp1b	Test	12.9019622053384	52.5176085057546	1	Pass	0.00704322330326988
S12-A32	8_1	Unknown	1	Dusp6	Test	6.65114153797135	117.533137066222	1	Pass	0.0114011679183338
S12-A33	8_1	Unknown	1	Ifg1rb	Test	9.14093023675811	102.01097115064	1	Pass	0.00843121681178218
S12-A34	8_1	Unknown	1	mycb	Test	9.68749099502575	58.3577047699125	1	Pass	0.00834510025919904
S12-A35	8_1	Unknown	1	Rpl13a2	Test	4.53548008492847	54.9324914844581	0.822228285350286	Pass	0.00967061280246088
S12-A36	8_1	Unknown	1	vox	Test	17.0076154171722	12.6311624336221	0.978306835261763	Pass	0.00881965691216683
S12-A37	8_1	Unknown	1	Crabp2a	Test	11.7326436858708	36.5275356314669	1	Pass	0.00685417042127909
S12-A38	8_1	Unknown	1	ezh2	Test	12.1051872281123	66.07060265238	1	Pass	0.00764759834232412
S12-A39	8_1	Unknown	1	Igf1	Test	13.158653905915	99.1084684159993	1	Pass	0.0083332072578722
S12-A40	8_1	Unknown	1	mycla	Test	12.4928590632326	48.1079839648082	1	Pass	0.0127686116084135
S12-A41	8_1	Unknown	1	sall4	Test	13.1951106744008	48.7306844557934	0.913205054103495	Pass	0.00681715441030155
S12-A42	8_1	Unknown	1	xpc	Test	11.3348740004423	34.8588390631332	0.980118992784393	Pass	0.00548824355156608
S12-A43	8_1	Unknown	1	Cyp26a1	Test	14.2041500805916	17.9499844986939	1	Pass	0.00883074677869744
S12-A44	8_1	Unknown	1	Fgf8a
S12-A45	8_1	Unknown	1	Igf1ra	Test	8.76491296933446	118.902398244307	1	Pass	0.00648470647509694
S12-A46	8_1	Unknown	1	nanog	Test	18.3424211845825	611.055933913527	0.987069031915132	Pass	0.0080293555926136
S12-A47	8_1	Unknown	1	spop	Test	9.27181160470844	93.9941988726319	0.930294258940595	Pass	0.00683061453397148
S12-A48	8_1	Unknown	1	yap1	Test	9.08302288164979	128.988204213326	0.85685326753617	Pass	0.00384749366749803
S18-A01	8_2	Unknown	1	actb1	Test	6.49838179930482	68.0470889010443	0.895312990038025	Pass	0.00515123486432751
S18-A02	8_2	Unknown	1	dnmt1	Test	10.2580149624653	52.8546057722612	1	Pass	0.00838036413701631
S18-A03	8_2	Unknown	1	Fgfr4	Test	10.6082319029041	65.0752394177935	1	Pass	0.00765676153628628
S18-A04	8_2	Unknown	1	jmjd6	Test	11.1306507463909	33.2893873376716	1	Pass	0.0067923511426121
S18-A05	8_2	Unknown	1	neil1	Test	10.2466853133407	48.9709968082601	1	Pass	0.0078521262809567
S18-A06	8_2	Unknown	1	tdg.1	Test	10.6066941366374	77.102266850841	0.92659578074914	Pass	0.00651112676535075
S18-A07	8_2	Unknown	1	Fgf4	Test	12.8290416044274	277.334040927599	1	Pass	0.00585753619118968
S18-A08	8_2	Unknown	1	dnmt3aa	Test	10.222737203511	58.7074253625795	1	Pass	0.00720457938855895
S18-A09	8_2	Unknown	1	foxo3a	Test	7.91587960167058	82.2592136058664	1	Pass	0.00894309864058025
S18-A10	8_2	Unknown	1	kdm2aa	Test	9.49725177924806	59.1299226733571	1	Pass	0.00799264174920814
S18-A11	8_2	Unknown	1	ogt.1	Test	9.77232161626066	53.8614746793817	1	Pass	0.00580787823573391
S18-A12	8_2	Unknown	1	tert	Test	14.6885323671262	83.3986975376277	1	Pass	0.00846945269463405
S18-A13	8_2	Unknown	1	Aldh1a2	Test	10.9638325732387	67.2223224842823	1	Pass	0.00632939983004382
S18-A14	8_2	Unknown	1	dnmt3ab	Test	8.91595501395923	76.444576708705	1	Pass	0.00931843179675896
S18-A15	8_2	Unknown	1	gadd45aa	Test	10.6220406759063	104.280004500589	1	Pass	0.00880831281487657
S18-A16	8_2	Unknown	1	kdm4b/jmjd2b	Test	9.32175939292316	80.1167832729137	1	Pass	0.00927896985905001
S18-A17	8_2	Unknown	1	pou5f3	Test	17.1848623560915	-1	0.866743242748469	Pass	0.00450652254380955
S18-A18	8_2	Unknown	1	tet3	Test	9.27927362845916	72.7530673778585	1	Pass	0.00750583387196605
S18-A19	8_2	Unknown	1	Axin2	Test	10.0059691309631	46.8883297873289	0.903295233250888	Pass	0.00461906985014386
S18-A20	8_2	Unknown	1	dnmt3ba	Test	11.3830429974058	66.8739839357744	0.994291715221241	Pass	0.00597259676966606
S18-A21	8_2	Unknown	1	gadd45ab	Test	9.36207307908821	80.7046983838379	1	Pass	0.00665105353454544
S18-A22	8_2	Unknown	1	lats1	Test	10.403970715258	53.2491310170515	1	Pass	0.00662357811419632
[truncated: 314 more rows]

## Sheet: data by genes
Experiment Information	Experiment Information	FAM-MGB		FAM-MGB	FAM-MGB
Sample	FAM-MGB	Ct		Ct	Ct
Name	Name	Value		Calibrated rConc	Quality
1_1	actb1	6.13974		87.6547	0.841415
1_2	actb1	5.53836		134.019	0.923446
1_3	actb1	5.34919		153.169	0.869278
2_1	actb1	4.5		278.963	0
2_2	actb1	6.64644		61.293	0.892851
2_3	actb1	5.62908		125.705	0.941081
3_1	actb1	5.91669		102.605	0.973631
3_2	actb1	5.08272		184.874	0.846973
3_3	actb1	5.68361		120.957	0.950352
4_1	actb1	5.85302		107.322	0.978347
4_2	actb1	6.2095		83.4419	0.872584
4_3	actb1	4.86356		215.811	0.936574
5_1	actb1	5.21828		168	0.848279
5_2	actb1	5.01564		193.84	0.807129
5_3	actb1	5.14324		177.141	0.815454
6_1	actb1	5.0202		193.217	0.802031
6_2	actb1	5.0128		194.229	0.800614
6_3	actb1	5.29068		159.629	0.865329
7_1_2	actb1	5.29726		158.889	0.843517
7_1_3	actb1	4.97433		199.576	0.991445
7_1_4	actb1	4.75703		232.668	0.870518
7_1_5	actb1	5.71283		118.487	0.942536
7_1_L	actb1	5.62642		125.941	0.931304
7_1_S	actb1	4.27435		327.14	0.660183
7_2_1	actb1	8.19947		20.4752	0.798407
7_2_10	actb1	6.28944		78.8631	0.826323
7_2_2	actb1	6.77957		55.7945	0.91423
7_2_3	actb1	7.00593		47.554	0.800819
7_2_4	actb1	9.38434		8.8701	0.836043
7_2_5	actb1	7.08977		44.8207	0.792596
7_2_8	actb1	7.94615		24.485	0.977519
7_2_L	actb1	4.42304		294.54	0.682372
7_2_S	actb1	5.32969		155.292	0.822164
7_3_1	actb1	4.72268		238.38	0.843394
7_3_2	actb1	4.75746		232.597	0.876229
7_3_3	actb1	7.48556		33.8942	0.872906
7_3_4	actb1	4.86908		214.971	0.950134
7_3_5	actb1	9.44341		8.50776	0.868425
7_3_L	actb1	5.7118		118.574	0.935212
7_3_S	actb1	4.35291		309.489	0.654245
8_1	actb1	6.9784		48.4873	0.943697
8_2	actb1	6.49838		68.0471	0.895313
8_3	actb1	4.86823		215.1	0.916996
C0	actb1	6.14724		87.1919	0.816021
C1	actb1	7.87087		25.8216	0.980775
C2	actb1	10.6537		3.62013	0.880192
C3	actb1	12.8184		0.785228	0.9576
H2O	actb1	999		-1	0
1_1	Aldh1a2	10.3283		106.965	1
1_2	Aldh1a2	9.95484		140.534	1
1_3	Aldh1a2	9.7118		167.853	0.996939
2_1	Aldh1a2	3.36713		17330.9	0
2_2	Aldh1a2	11.3184		51.8765	0.93836
2_3	Aldh1a2	10.3551		104.891	0.981269
3_1	Aldh1a2	10.4791		95.7988	0.965643
3_2	Aldh1a2	9.99537		136.432	1
3_3	Aldh1a2	10.05		131.089	0.957125
4_1	Aldh1a2	10.1693		120.145	0.973466
4_2	Aldh1a2	11.1133		60.2674	0.97184
4_3	Aldh1a2	9.46246		201.405	0.970069
5_1	Aldh1a2	10.6663		83.5521	1
5_2	Aldh1a2	10.0352		132.52	0.927325
5_3	Aldh1a2	10.1329		123.39	0.93688
6_1	Aldh1a2	10.0703		129.166	0.915516
6_2	Aldh1a2	9.66525		173.662	1
6_3	Aldh1a2	10.315		108.011	0.997022
7_1_2	Aldh1a2	11.167		57.9467	0.938292
7_1_3	Aldh1a2	9.8994		146.346	1
7_1_4	Aldh1a2	10.2822		110.631	0.963847
7_1_5	Aldh1a2	10.3642		104.195	0.979292
7_1_L	Aldh1a2	10.6706		83.2908	1
7_1_S	Aldh1a2	8.8864		306.847	1
7_2_1	Aldh1a2	12.7095		18.7676	0.990481
7_2_10	Aldh1a2	10.5981		87.8208	1
7_2_2	Aldh1a2	12.0427		30.5536	0.880562
7_2_3	Aldh1a2	12.7401		18.3522	0.984092
7_2_4	Aldh1a2	14.1036		6.77491	0.923256
7_2_5	Aldh1a2	12.3905		23.6951	0.956553
7_2_8	Aldh1a2	12.9757		15.4497	1
7_2_L	Aldh1a2	9.07479		267.378	0.90183
7_2_S	Aldh1a2	9.65489		174.982	0.978216
7_3_1	Aldh1a2	9.90581		145.662	1
7_3_2	Aldh1a2	9.58337		184.371	1
7_3_3	Aldh1a2	12.3683		24.0832	0.97267
7_3_4	Aldh1a2	9.77838		159.88	1
7_3_5	Aldh1a2	17.6379		0.511752	1
7_3_L	Aldh1a2	10.382		102.85	0.968013
7_3_S	Aldh1a2	9.20457		243.181	0.948055
8_1	Aldh1a2	11.4111		48.4765	0.982262
8_2	Aldh1a2	10.9638		67.2223	1
8_3	Aldh1a2	9.90953		145.266	1
C0	Aldh1a2	10.4433		98.3385	0.981897
C1	Aldh1a2	12.6921		19.0079	1
C2	Aldh1a2	14.6166		4.65671	1
C3	Aldh1a2	17.1421		0.735263	0.963989
H2O	Aldh1a2	999		-1	0
1_1	Axin2	8.89797		84.4921	1
1_2	Axin2	8.88079		85.2673	0.991823
1_3	Axin2	8.85029		86.6608	1
2_1	Axin2	999		-1	0
2_2	Axin2	9.67922		55.7808	1
2_3	Axin2	9.78248		52.8022	1
3_1	Axin2	8.94576		82.3733	1
3_2	Axin2	8.37715		111.438	0.985741
3_3	Axin2	8.92403		83.3299	1
4_1	Axin2	8.93209		82.974	1
4_2	Axin2	9.79191		52.5382	1
4_3	Axin2	8.69733		94.0002	0.971532
5_1	Axin2	8.91954		83.5292	1
5_2	Axin2	9.14576		74.0665	0.895083
5_3	Axin2	9.56165		59.3776	0.962143
6_1	Axin2	9.18057		72.7088	0.957558
6_2	Axin2	8.98253		80.7791	1
6_3	Axin2	9.64342		56.8524	1
7_1_2	Axin2	11.616		19.9267	0.987807
7_1_3	Axin2	9.84966		50.95	1
7_1_4	Axin2	10.7695		31.2483	0.963726
7_1_5	Axin2	9.96607		47.8932	1
7_1_L	Axin2	9.07321		76.978	1
7_1_S	Axin2	9.39523		64.869	1
7_2_1	Axin2	13.8125		6.20068	0.993589
7_2_10	Axin2	12.2688		14.0851	0.927507
7_2_2	Axin2	15.0989		3.12964	0.848553
7_2_3	Axin2	14.6964		3.87616	0.980288
7_2_4	Axin2	15.9775		1.962	1
7_2_5	Axin2	12.3353		13.5955	0.925918
7_2_8	Axin2	13.7167		6.52453	0.982362
7_2_L	Axin2	8.77507		90.1956	1
7_2_S	Axin2	10.2775		40.5872	1
7_3_1	Axin2	11.0114		27.4785	0.862009
7_3_2	Axin2	10.2845		40.4369	0.944193
7_3_3	Axin2	13.8827		5.97359	1
7_3_4	Axin2	10.6985		32.4497	0.980343
7_3_5	Axin2	16.0961		1.8421	0.96817
7_3_L	Axin2	10.2128		42.0081	0.931604
7_3_S	Axin2	9.47435		62.1979	1
8_1	Axin2	9.8718		50.3539	1
8_2	Axin2	10.006		46.8883	0.903295
8_3	Axin2	9.03552		78.5358	0.951164
C0	Axin2	8.95538		81.9531	1
C1	Axin2	11.1289		25.8152	1
C2	Axin2	14.4743		4.36188	1
C3	Axin2	17.9341		0.693531	0.996955
H2O	Axin2	999		-1	0
1_1	cdkn2c	12.7077		219.551	1
1_2	cdkn2c	12.6631		227.428	1
1_3	cdkn2c	12.2473		316.069	0.985924
2_1	cdkn2c	13.3816		128.786	0.87187
2_2	cdkn2c	13.0743		164.244	0.935617
2_3	cdkn2c	12.8229		200.406	1
3_1	cdkn2c	13.4705		120.03	1
3_2	cdkn2c	12.2141		324.505	1
3_3	cdkn2c	12.2689		310.716	1
4_1	cdkn2c	12.7294		215.801	1
4_2	cdkn2c	12.926		184.704	1
4_3	cdkn2c	11.918		410.219	1
5_1	cdkn2c	12.6118		236.853	1
5_2	cdkn2c	12.763		210.133	1
5_3	cdkn2c	12.8505		196.072	1
6_1	cdkn2c	13.6661		102.811	1
6_2	cdkn2c	12.2694		310.591	1
6_3	cdkn2c	12.7064		219.763	1
7_1_2	cdkn2c	14.6217		48.2536	1
7_1_3	cdkn2c	12.734		215.02	1
7_1_4	cdkn2c	14.9061		38.5261	1
7_1_5	cdkn2c	13.3318		133.959	1
7_1_L	cdkn2c	13.3468		132.379	0.982218
7_1_S	cdkn2c	13.0986		161.115	0.987464
7_2_1	cdkn2c	16.702		9.29744	1
7_2_10	cdkn2c	14.9345		37.6702	1
7_2_2	cdkn2c	17.3111		5.74097	0.949712
7_2_3	cdkn2c	16.318		12.6005	0.964332
7_2_4	cdkn2c	17.6681		4.32771	1
7_2_5	cdkn2c	15.0601		34.1046	0.949432
7_2_8	cdkn2c	17.3969		5.36417	0.981867
7_2_L	cdkn2c	12.8829		191.116	1
7_2_S	cdkn2c	13.6787		101.794	1
7_3_1	cdkn2c	14.6788		46.1216	1
7_3_2	cdkn2c	13.3314		134.001	1
7_3_3	cdkn2c	15.6999		20.5531	1
7_3_4	cdkn2c	14.2022		67.2565	1
7_3_5	cdkn2c	17.8672		3.69657	1
7_3_L	cdkn2c	13.2075		147.808	0.9863
7_3_S	cdkn2c	13.0004		174.134	0.952132
8_1	cdkn2c	14.1269		71.3916	0.976153
8_2	cdkn2c	13.0851		162.844	0.984342
8_3	cdkn2c	12.6207		235.192	1
C0	cdkn2c	13.7011		100	1
C1	cdkn2c	15.7344		20	1
C2	cdkn2c	999		-1	0
C3	cdkn2c	999		-1	0
H2O	cdkn2c	999		-1	0
1_1	Crabp1b	12.1788		81.2131	0.977971
1_2	Crabp1b	11.3668		132.496	0.997438
1_3	Crabp1b	11.7785		103.373	1
2_1	Crabp1b	2.5		27764	0.06
2_2	Crabp1b	12.9459		51.145	1
2_3	Crabp1b	12.5219		66.039	1
3_1	Crabp1b	12.0318		88.7381	0.926375
3_2	Crabp1b	11.7178		107.23	1
3_3	Crabp1b	11.6199		113.747	1
4_1	Crabp1b	11.9102		95.4843	1
4_2	Crabp1b	12.9597		50.7223	1
4_3	Crabp1b	11.4064		129.373	1
5_1	Crabp1b	11.7661		104.149	1
5_2	Crabp1b	11.7044		108.097	1
5_3	Crabp1b	11.4948		122.654	0.983369
6_1	Crabp1b	12.071		86.6656	0.949658
6_2	Crabp1b	11.0849		157.042	0.960808
6_3	Crabp1b	11.4393		126.831	1
7_1_2	Crabp1b	12.7587		57.2529	1
7_1_3	Crabp1b	11.4402		126.764	0.985351
7_1_4	Crabp1b	11.6611		110.958	1
7_1_5	Crabp1b	11.4785		123.867	1
7_1_L	Crabp1b	12.0607		87.2068	0.948464
7_1_S	Crabp1b	10.5912		211.473	1
7_2_1	Crabp1b	14.2973		22.6475	0.966165
7_2_10	Crabp1b	13.5899		34.6907	1
7_2_2	Crabp1b	15.4307		11.4366	0.939387
7_2_3	Crabp1b	14.632		18.5094	1
7_2_4	Crabp1b	17.7472		2.83032	1
7_2_5	Crabp1b	13.3727		39.544	0.988895
7_2_8	Crabp1b	14.5988		18.8836	1
7_2_L	Crabp1b	11.2307		143.828	0.94541
7_2_S	Crabp1b	12.0003		90.4374	0.929211
7_3_1	Crabp1b	11.4461		126.31	0.992508
7_3_2	Crabp1b	10.8842		177.232	1
7_3_3	Crabp1b	14.1645		24.534	0.957495
7_3_4	Crabp1b	12.0421		88.1869	0.964693
7_3_5	Crabp1b	18.1472		2.22398	0.979473
7_3_L	Crabp1b	11.8849		96.9561	1
7_3_S	Crabp1b	11.4887		123.108	1
8_1	Crabp1b	12.902		52.5176	1
8_2	Crabp1b	12.2693		76.9017	0.970935
8_3	Crabp1b	11.6398		112.393	1
C0	Crabp1b	12.0505		87.7452	0.944401
C1	Crabp1b	14.0698		25.9766	0.989989
C2	Crabp1b	17.3903		3.50981	1
C3	Crabp1b	999		-1	0
H2O	Crabp1b	999		-1	0
1_1	Crabp2a	10.0907		102.798	1
1_2	Crabp2a	9.37321		161.559	1
1_3	Crabp2a	9.79165		124.113	1
2_1	Crabp2a	999		-1	0
2_2	Crabp2a	11.4593		43.3942	1
2_3	Crabp2a	10.2218		94.6436	1
3_1	Crabp2a	10.5377		77.5609	1
3_2	Crabp2a	9.61152		139.031	1
3_3	Crabp2a	9.79414		123.918	1
4_1	Crabp2a	10.1814		97.0869	1
4_2	Crabp2a	11.3454		46.6216	1
4_3	Crabp2a	9.00364		203.925	1
5_1	Crabp2a	10.5004		79.4041	1
5_2	Crabp2a	9.48475		150.593	1
5_3	Crabp2a	9.64966		135.73	1
6_1	Crabp2a	9.67227		133.81	1
6_2	Crabp2a	8.93599		212.807	1
6_3	Crabp2a	9.65295		135.449	1
7_1_2	Crabp2a	11.0976		54.5028	1
7_1_3	Crabp2a	10.6782		70.9887	1
7_1_4	Crabp2a	10.9521		59.737	1
7_1_5	Crabp2a	9.44199		154.707	1
7_1_L	Crabp2a	10.2365		93.7747	1
7_1_S	Crabp2a	10.057		105.004	1
7_2_1	Crabp2a	13.8109		9.8595	1
7_2_10	Crabp2a	12.5087		22.3988	1
7_2_2	Crabp2a	11.8438		34.0557	1
7_2_3	Crabp2a	12.6833		20.066	1
7_2_4	Crabp2a	15.2203		4.05644	1
7_2_5	Crabp2a	11.1007		54.3974	1
7_2_8	Crabp2a	13.5971		11.2817	1
7_2_L	Crabp2a	8.77419		235.65	1
7_2_S	Crabp2a	10.5433		77.2898	1
7_3_1	Crabp2a	11.1656		52.2156	1
7_3_2	Crabp2a	9.93371		113.485	1
7_3_3	Crabp2a	13.7823		10.0386	1
7_3_4	Crabp2a	11.0702		55.4512	1
7_3_5	Crabp2a	14.0043		8.72858	1
7_3_L	Crabp2a	10.1402		99.6413	1
7_3_S	Crabp2a	11.0329		56.77	1
8_1	Crabp2a	11.7326		36.5275	1
8_2	Crabp2a	11.1659		52.2049	1
8_3	Crabp2a	9.36949		161.939	1
C0	Crabp2a	10.3054		89.7865	1
C1	Crabp2a	12.574		21.4957	1
C2	Crabp2a	14.9585		4.78393	1
C3	Crabp2a	18.0241		0.69316	1
H2O	Crabp2a	999		-1	0
1_1	Cyp26a1	11.139		166.747	1
1_2	Cyp26a1	11.0086		183.326	1
1_3	Cyp26a1	11.5266		125.795	1
2_1	Cyp26a1	3.57464		40824.6	0.394901
2_2	Cyp26a1	12.2478		74.452	1
2_3	Cyp26a1	11.9546		92.1462	1
3_1	Cyp26a1	12.0792		84.1631	1
3_2	Cyp26a1	11.5014		128.122	1
3_3	Cyp26a1	11.1763		162.287	1
4_1	Cyp26a1	11.9279		93.9569	1
4_2	Cyp26a1	12.6554		55.3569	1
4_3	Cyp26a1	11.1006		171.462	1
5_1	Cyp26a1	12.6066		57.3577	1
5_2	Cyp26a1	11.4576		132.268	1
5_3	Cyp26a1	11.6453		115.388	1
6_1	Cyp26a1	12.0178		88.0066	1
6_2	Cyp26a1	10.9581		190.183	1
6_3	Cyp26a1	11.6313		116.569	1
7_1_2	Cyp26a1	12.0519		85.8531	0.998777
7_1_3	Cyp26a1	11.0746		174.734	1
7_1_4	Cyp26a1	12.4677		63.452	1
7_1_5	Cyp26a1	10.8551		204.985	1
7_1_L	Cyp26a1	12.4642		63.6114	1
7_1_S	Cyp26a1	10.3954		286.334	1
7_2_1	Cyp26a1	14.4943		14.5359	1
7_2_10	Cyp26a1	11.3281		145.327	1
7_2_2	Cyp26a1	10.7683		218.341	1
7_2_3	Cyp26a1	14.2564		17.2811	1
7_2_4	Cyp26a1	18.4784		0.80209	1
7_2_5	Cyp26a1	14.9696		10.288	1
7_2_8	Cyp26a1	16.4809		3.42814	1
7_2_L	Cyp26a1	10.445		276.203	1
7_2_S	Cyp26a1	11.3507		142.959	1
7_3_1	Cyp26a1	10.2348		321.808	1
7_3_2	Cyp26a1	11.7448		107.332	1
7_3_3	Cyp26a1	15.8885		5.27388	1
7_3_4	Cyp26a1	10.9865		186.297	1
7_3_5	Cyp26a1	13.4923		30.1211	1
7_3_L	Cyp26a1	11.6795		112.556	1
7_3_S	Cyp26a1	10.4717		270.889	1
8_1	Cyp26a1	14.2042		17.95	1
8_2	Cyp26a1	12.1932		77.4672	1
8_3	Cyp26a1	10.4719		270.86	1
C0	Cyp26a1	11.946		92.7273	1
C1	Cyp26a1	13.7479		25.0121	1
C2	Cyp26a1	16.5723		3.20772	1
C3	Cyp26a1	18.3822		0.860252	1
H2O	Cyp26a1	999		-1	0
1_1	dnmt1	9.20312		95.2937	1
1_2	dnmt1	9.35824		87.3819	1
1_3	dnmt1	9.45423		82.8189	1
2_1	dnmt1	9.5		80.7276	1
2_2	dnmt1	10.5646		44.5346	1
2_3	dnmt1	9.7117		71.7217	1
3_1	dnmt1	9.64879		74.2877	1
3_2	dnmt1	9.01172		106.049	1
3_3	dnmt1	9.31799		89.3691	1
4_1	dnmt1	9.53372		79.2211	1
4_2	dnmt1	10.0159		60.5102	1
4_3	dnmt1	9.05886		103.293	1
5_1	dnmt1	9.24123		93.2857	1
5_2	dnmt1	9.31235		89.6513	1
5_3	dnmt1	10.1477		56.2149	1
6_1	dnmt1	9.33264		88.6409	1
6_2	dnmt1	9.35126		87.7231	1
6_3	dnmt1	9.59311		76.6352	1
7_1_2	dnmt1	10.334		50.6564	1
7_1_3	dnmt1	9.08708		101.677	1
7_1_4	dnmt1	10.0452		59.5277	0.991562
7_1_5	dnmt1	9.16011		97.6111	1
7_1_L	dnmt1	9.66272		73.7119	1
7_1_S	dnmt1	8.67247		128.183	1
7_2_1	dnmt1	12.1349		18.5203	1
7_2_10	dnmt1	10.2508		53.0691	1
7_2_2	dnmt1	12.5383		14.7829	1
7_2_3	dnmt1	12.677		13.6799	1
7_2_4	dnmt1	15.8284		2.35163	1
7_2_5	dnmt1	10.9641		35.6248	1
7_2_8	dnmt1	12.5141		14.9835	1
7_2_L	dnmt1	8.40881		148.528	1
7_2_S	dnmt1	9.24731		92.9692	1
7_3_1	dnmt1	9.92163		63.7838	1
7_3_2	dnmt1	9.06952		102.679	1
7_3_3	dnmt1	11.8932		21.1977	1
7_3_4	dnmt1	10.17		55.5195	1
7_3_5	dnmt1	14.3309		5.42943	1
7_3_L	dnmt1	10.0363		59.8254	0.996302
7_3_S	dnmt1	9.04246		104.244	1
8_1	dnmt1	10.3006		51.6112	1
8_2	dnmt1	10.258		52.8546	1
8_3	dnmt1	9.07298		102.481	0.987895
C0	dnmt1	9.42151		84.347	1
C1	dnmt1	11.8294		21.9672	1
C2	dnmt1	14.2996		5.52538	1
C3	dnmt1	18.1996		0.625135	1
H2O	dnmt1	999		-1	0
1_1	dnmt3aa	9.4127		94.4294	1
1_2	dnmt3aa	9.27578		102.329	1
1_3	dnmt3aa	9.1427		110.639	0.996843
2_1	dnmt3aa	20.3112		0.157746	0.822317
2_2	dnmt3aa	10.1558		61.0588	0.982686
2_3	dnmt3aa	9.53202		88.0445	1
3_1	dnmt3aa	9.68003		80.7209	1
3_2	dnmt3aa	8.91873		126.177	1
3_3	dnmt3aa	9.12266		111.948	1
4_1	dnmt3aa	9.73389		78.2098	1
4_2	dnmt3aa	9.4703		91.2912	1
4_3	dnmt3aa	8.37199		173.901	1
5_1	dnmt3aa	9.49871		89.7823	1
5_2	dnmt3aa	9.61232		83.9924	1
5_3	dnmt3aa	9.69738		79.9031	1
6_1	dnmt3aa	9.80545		74.9941	1
6_2	dnmt3aa	9.68587		80.4445	1
6_3	dnmt3aa	9.44664		92.5674	1
7_1_2	dnmt3aa	11.3334		30.5959	0.997431
7_1_3	dnmt3aa	10.9235		38.9146	1
7_1_4	dnmt3aa	11.2085		32.9235	0.999244
7_1_5	dnmt3aa	10.3361		54.9306	1
7_1_L	dnmt3aa	9.89151		71.301	1
7_1_S	dnmt3aa	9.71977		78.8604	1
7_2_1	dnmt3aa	13.679		7.72636	1
7_2_10	dnmt3aa	12.5223		15.2309	1
7_2_2	dnmt3aa	13.4386		8.89671	0.995891
7_2_3	dnmt3aa	13.9347		6.64998	1
7_2_4	dnmt3aa	16.6599		1.34393	1
7_2_5	dnmt3aa	12.3121		17.2302	1
7_2_8	dnmt3aa	14.0998		6.03597	0.982458
7_2_L	dnmt3aa	9.39391		95.4759	0.996735
7_2_S	dnmt3aa	10.6636		45.326	1
7_3_1	dnmt3aa	11.2267		32.5742	1
7_3_2	dnmt3aa	10.1416		61.5716	1
7_3_3	dnmt3aa	13.8088		7.15962	1
7_3_4	dnmt3aa	10.9918		37.386	1
7_3_5	dnmt3aa	17.6921		0.73342	1
7_3_L	dnmt3aa	10.2992		56.1306	1
7_3_S	dnmt3aa	10.2819		56.7041	1
8_1	dnmt3aa	10.3203		55.4407	1
8_2	dnmt3aa	10.2227		58.7074	1
8_3	dnmt3aa	9.63008		83.1218	1
C0	dnmt3aa	9.55264		86.9854	1
C1	dnmt3aa	11.7434		24.0541	1
C2	dnmt3aa	14.7172		4.20146	1
C3	dnmt3aa	17.7047		0.728019	1
H2O	dnmt3aa	999		-1	0
1_1	dnmt3ab	8.18226		130.827	1
1_2	dnmt3ab	8.30174		119.867	1
1_3	dnmt3ab	8.05228		143.893	0.978945
2_1	dnmt3ab	2.5		8393.5	0.0816683
2_2	dnmt3ab	8.87559		78.7382	1
2_3	dnmt3ab	8.51662		102.413	1
3_1	dnmt3ab	8.72958		87.6238	1
3_2	dnmt3ab	7.89392		161.586	1
3_3	dnmt3ab	7.8419		167.861	1
4_1	dnmt3ab	8.53859		100.778	1
4_2	dnmt3ab	8.32276		118.035	1
4_3	dnmt3ab	7.70631		185.385	1
5_1	dnmt3ab	8.63493		93.9129	1
5_2	dnmt3ab	8.40717		110.96	1
5_3	dnmt3ab	8.89408		77.6791	1
6_1	dnmt3ab	8.79262		83.6708	1
6_2	dnmt3ab	8.17467		131.557	1
6_3	dnmt3ab	8.49291		104.207	1
7_1_2	dnmt3ab	10.5265		23.5018	1
7_1_3	dnmt3ab	9.76142		41.1573	1
7_1_4	dnmt3ab	9.86267		38.2159	1
7_1_5	dnmt3ab	9.23999		60.2958	1
7_1_L	dnmt3ab	9.16762		63.5777	1
7_1_S	dnmt3ab	8.81207		82.4876	1
7_2_1	dnmt3ab	12.3122		6.35601	0.999841
7_2_10	dnmt3ab	11.3776		12.6014	1
7_2_2	dnmt3ab	12.7586		4.58341	1
7_2_3	dnmt3ab	13.0723		3.64262	0.970071
7_2_4	dnmt3ab	15.756		0.510354	1
7_2_5	dnmt3ab	11.2174		14.1703	0.985423
7_2_8	dnmt3ab	11.9212		8.46291	1
7_2_L	dnmt3ab	8.50005		103.663	1
7_2_S	dnmt3ab	9.69964		43.062	1
7_3_1	dnmt3ab	10.6505		21.4625	1
7_3_2	dnmt3ab	9.71885		42.4607	1
7_3_3	dnmt3ab	12.4673		5.67318	1
7_3_4	dnmt3ab	10.3057		27.6265	1
7_3_5	dnmt3ab	14.1004		1.7157	1
7_3_L	dnmt3ab	9.10766		66.4317	0.988029
7_3_S	dnmt3ab	9.58359		46.8818	1
8_1	dnmt3ab	9.10061		66.7755	0.983751
8_2	dnmt3ab	8.91596		76.4446	1
8_3	dnmt3ab	8.65113		92.8054	1
C0	dnmt3ab	8.56685		98.7141	1
C1	dnmt3ab	10.6901		20.8494	1
C2	dnmt3ab	13.0051		3.82646	0.978379
C3	dnmt3ab	15.1207		0.812664	1
H2O	dnmt3ab	999		-1	0
1_1	dnmt3ba	10.3319		134.987	0.98427
1_2	dnmt3ba	10.7051		105.193	1
1_3	dnmt3ba	10.3744		131.212	0.979274
2_1	dnmt3ba	2.90822		19260.1	0.135954
2_2	dnmt3ba	11.5322		60.5316	0.99076
2_3	dnmt3ba	11.3509		68.3257	0.998367
3_1	dnmt3ba	11.0643		82.7504	0.941186
3_2	dnmt3ba	10.5057		120.19	1
3_3	dnmt3ba	10.3153		136.492	0.995535
4_1	dnmt3ba	10.7901		99.3902	1
4_2	dnmt3ba	11.4391		64.4141	1
4_3	dnmt3ba	10.4149		127.703	1
5_1	dnmt3ba	10.7437		102.519	1
5_2	dnmt3ba	10.7304		103.435	1
5_3	dnmt3ba	11.2176		74.6891	0.966266
6_1	dnmt3ba	10.4295		126.47	0.996323
6_2	dnmt3ba	10.6155		111.688	1
6_3	dnmt3ba	11.1087		80.3283	0.990717
7_1_2	dnmt3ba	11.6037		57.7076	1
7_1_3	dnmt3ba	11.2165		74.7436	0.966687
7_1_4	dnmt3ba	11.1967		75.7412	0.976101
7_1_5	dnmt3ba	10.3991		129.062	0.99311
7_1_L	dnmt3ba	11.0694		82.4637	0.955554
7_1_S	dnmt3ba	10.3455		133.77	1
7_2_1	dnmt3ba	13.6724		14.4834	1
7_2_10	dnmt3ba	12.7777		26.3353	1
7_2_2	dnmt3ba	14.4313		8.72291	0.952807
7_2_3	dnmt3ba	14.9688		6.09075	1
7_2_4	dnmt3ba	16.5798		2.07561	1
7_2_5	dnmt3ba	12.6853		28.0114	1
7_2_8	dnmt3ba	14.1454		10.5587	0.953846
7_2_L	dnmt3ba	9.95953		173.125	1
7_2_S	dnmt3ba	10.9913		86.8849	1
7_3_1	dnmt3ba	12.5012		31.6791	0.986746
7_3_2	dnmt3ba	10.8766		93.8075	1
7_3_3	dnmt3ba	14.0237		11.4533	0.954872
7_3_4	dnmt3ba	11.7064		53.8803	1
7_3_5	dnmt3ba	15.9491		3.16361	1
7_3_L	dnmt3ba	11.472		63.0133	0.999546
7_3_S	dnmt3ba	11.047		83.7115	0.948388
8_1	dnmt3ba	11.5998		57.8551	1
8_2	dnmt3ba	11.383		66.874	0.994292
8_3	dnmt3ba	10.8248		97.1072	1
C0	dnmt3ba	10.9334		90.313	1
C1	dnmt3ba	13.0245		22.3313	0.983767
C2	dnmt3ba	15.4706		4.35552	0.989063
C3	dnmt3ba	18.1466		0.728577	0.935173
H2O	dnmt3ba	999		-1	0
1_1	dnmt3bb,1	10.7466		226.124	0.972973
1_2	dnmt3bb,1	11.2023		158.7	0.961119
1_3	dnmt3bb,1	11.752		103.54	1
2_1	dnmt3bb,1	999		-1	0
2_2	dnmt3bb,1	12.9947		39.4252	1
2_3	dnmt3bb,1	11.8712		94.3762	0.982252
3_1	dnmt3bb,1	11.6811		109.402	1
3_2	dnmt3bb,1	11.4403		131.909	1
3_3	dnmt3bb,1	11.9739		87.1432	1
4_1	dnmt3bb,1	11.1931		159.84	0.973552
4_2	dnmt3bb,1	12.749		47.7183	1
4_3	dnmt3bb,1	10.6863		236.977	1
5_1	dnmt3bb,1	10.7716		221.783	0.969135
5_2	dnmt3bb,1	11.566		119.64	1
5_3	dnmt3bb,1	11.588		117.61	0.998558
6_1	dnmt3bb,1	10.7086		232.905	0.977332
6_2	dnmt3bb,1	11.3043		146.618	1
6_3	dnmt3bb,1	11.6256		114.224	1
7_1_2	dnmt3bb,1	10.8069		215.787	1
7_1_3	dnmt3bb,1	11.2533		152.533	0.967628
7_1_4	dnmt3bb,1	10.9397		194.631	1
7_1_5	dnmt3bb,1	10.9954		186.389	1
7_1_L	dnmt3bb,1	10.8045		216.186	1
7_1_S	dnmt3bb,1	9.67899		518.342	1
7_2_1	dnmt3bb,1	14.2814		14.5067	0.965439
7_2_10	dnmt3bb,1	12.3477		65.1744	0.970096
7_2_2	dnmt3bb,1	14.6811		10.6339	0.99715
7_2_3	dnmt3bb,1	14.0855		16.8921	0.922616
7_2_4	dnmt3bb,1	19.3725		0.277746	0.978778
7_2_5	dnmt3bb,1	12.7753		46.7512	1
7_2_8	dnmt3bb,1	14.2255		15.1509	0.972354
7_2_L	dnmt3bb,1	9.79987		471.873	0.990714
7_2_S	dnmt3bb,1	10.7868		219.173	1
7_3_1	dnmt3bb,1	11.5237		123.634	0.980965
7_3_2	dnmt3bb,1	10.5567		262.087	1
7_3_3	dnmt3bb,1	14.1519		16.0428	0.960449
7_3_4	dnmt3bb,1	11.3888		137.293	1
7_3_5	dnmt3bb,1	14.1685		15.837	0.985206
7_3_L	dnmt3bb,1	11.3491		141.601	0.962158
7_3_S	dnmt3bb,1	10.5298		267.613	1
8_1	dnmt3bb,1	12.6665		50.8758	1
8_2	dnmt3bb,1	12.4772		58.9373	0.996871
8_3	dnmt3bb,1	10.0178		398.367	0.930301
C0	dnmt3bb,1	11.6937		108.337	1
C1	dnmt3bb,1	13.637		23.9354	1
C2	dnmt3bb,1	16.7111		2.19636	1
C3	dnmt3bb,1	17.5736		1.12372	1
H2O	dnmt3bb,1	999		-1	0
1_1	Dusp6	6.69475		113.894	1
1_2	Dusp6	6.29683		151.757	1
1_3	Dusp6	6.49144		131.882	1
2_1	Dusp6	999		-1	0
2_2	Dusp6	7.22182		77.874	0.987284
2_3	Dusp6	7.00356		91.1517	0.982145
3_1	Dusp6	7.06448		87.2332	0.981121
3_2	Dusp6	6.2131		161.205	1
3_3	Dusp6	6.17725		165.428	1
4_1	Dusp6	6.86744		100.555	1
4_2	Dusp6	6.74683		109.694	1
4_3	Dusp6	5.90658		201.092	1
5_1	Dusp6	6.14377		169.472	0.998558
5_2	Dusp6	6.503		130.787	1
5_3	Dusp6	6.86192		100.956	1
6_1	Dusp6	7.2481		76.4122	1
6_2	Dusp6	6.25435		156.479	1
6_3	Dusp6	6.60771		121.274	1
7_1_2	Dusp6	7.8315		50.166	1
7_1_3	Dusp6	7.84882		49.5434	1
7_1_4	Dusp6	7.02895		89.4977	0.978422
7_1_5	Dusp6	7.80929		50.9763	1
7_1_L	Dusp6	7.18912		79.733	1
7_1_S	Dusp6	6.568		124.797	1
7_2_1	Dusp6	10.0463		10.1534	0.974538
7_2_10	Dusp6	7.90807		47.4706	1
7_2_2	Dusp6	8.11242		40.9648	0.964374
7_2_3	Dusp6	8.84114		24.2181	1
7_2_4	Dusp6	11.4153		3.78235	1
7_2_5	Dusp6	8.71966		26.4357	1
7_2_8	Dusp6	9.53547		14.677	1
7_2_L	Dusp6	6.46051		134.858	1
7_2_S	Dusp6	6.78293		106.875	1
7_3_1	Dusp6	6.70107		113.376	1
7_3_2	Dusp6	6.599		122.038	1
7_3_3	Dusp6	10.1525		9.40494	1
7_3_4	Dusp6	6.86396		100.808	1
7_3_5	Dusp6	10.7551		6.08946	1
7_3_L	Dusp6	7.07474		86.5897	0.992677
7_3_S	Dusp6	6.55066		126.367	1
8_1	Dusp6	6.65114		117.533	1
8_2	Dusp6	6.95292		94.5426	1
8_3	Dusp6	6.09208		175.908	1
C0	Dusp6	6.8671		100.58	1
C1	Dusp6	8.99934		21.6064	1
C2	Dusp6	11.576		3.36841	1
C3	Dusp6	13.446		0.874304	1
H2O	Dusp6	999		-1	0
1_1	ezh2	11.2715		115.626	1
1_2	ezh2	11.2925		114.005	1
1_3	ezh2	11.1441		125.946	1
2_1	ezh2	12.5		50.6883	0
2_2	ezh2	12.7806		41.9848	1
2_3	ezh2	11.6165		91.7239	1
3_1	ezh2	11.5954		93.0304	1
3_2	ezh2	10.8817		150.205	1
3_3	ezh2	10.985		140.147	1
4_1	ezh2	11.4823		100.371	1
4_2	ezh2	11.7293		85.0317	1
4_3	ezh2	10.1702		242.176	1
5_1	ezh2	10.8611		152.302	1
5_2	ezh2	11.1693		123.838	1
5_3	ezh2	11.0731		132.094	1
6_1	ezh2	10.5862		183.167	1
6_2	ezh2	10.6489		175.618	1
6_3	ezh2	10.7492		164.184	1
7_1_2	ezh2	11.8687		77.4396	1
7_1_3	ezh2	11.1762		123.263	1
7_1_4	ezh2	11.5218		97.7438	1
7_1_5	ezh2	10.6457		175.996	1
7_1_L	ezh2	11.664		88.8435	1
7_1_S	ezh2	10.3288		217.718	1
7_2_1	ezh2	13.255		30.5362	1
7_2_10	ezh2	12.8514		40.0385	1
7_2_2	ezh2	14.0596		17.7924	0.989147
7_2_3	ezh2	15.5782		6.4198	1
7_2_4	ezh2	16.9941		2.48167	1
7_2_5	ezh2	12.8539		39.9711	1
7_2_8	ezh2	14.4495		13.6956	1
7_2_L	ezh2	9.78271		314.11	1
7_2_S	ezh2	10.7995		158.733	1
7_3_1	ezh2	12.1488		64.1643	1
7_3_2	ezh2	10.9359		144.845	1
7_3_3	ezh2	13.8962		19.8555	1
7_3_4	ezh2	11.8693		77.4086	1
7_3_5	ezh2	14.9573		9.7395	1
7_3_L	ezh2	11.0691		132.454	1
7_3_S	ezh2	11.0564		133.59	1
8_1	ezh2	12.1052		66.0706	1
8_2	ezh2	12.5973		47.4828	1
8_3	ezh2	10.3385		216.303	1
C0	ezh2	11.395		106.423	1
C1	ezh2	13.645		23.5017	1
C2	ezh2	17.0419		2.40331	1
C3	ezh2	18.2547		1.06472	1
H2O	ezh2	999		-1	0
1_1	Fgf4	13.2118		188.52	0.960078
1_2	Fgf4	11.6889		875.8	1
1_3	Fgf4	12.2316		506.614	0.970753
2_1	Fgf4	10.5		2905.1	0
2_2	Fgf4	13.3573		162.784	0.961004
2_3	Fgf4	12.8023		284.903	1
3_1	Fgf4	12.8379		274.879	0.997829
3_2	Fgf4	11.8345		756.222	1
3_3	Fgf4	12.2588		492.918	0.961902
4_1	Fgf4	12.9116		255.173	1
4_2	Fgf4	13.1688		196.869	0.969775
4_3	Fgf4	11.2728		1332.5	0.974763
5_1	Fgf4	12.1678		540.281	0.946776
5_2	Fgf4	11.4717		1090.33	0.995947
5_3	Fgf4	11.0189		1721.39	0.927458
6_1	Fgf4	11.9824		651.386	1
6_2	Fgf4	12.0629		600.604	0.950962
6_3	Fgf4	12.2232		510.955	0.974774
7_1_2	Fgf4	13.2012		190.544	0.954813
7_1_3	Fgf4	13.0928		212.556	0.950437
7_1_4	Fgf4	12.2558		494.424	0.94714
7_1_5	Fgf4	11.953		671.032	1
7_1_L	Fgf4	12.6782		322.9	1
7_1_S	Fgf4	11.9584		667.359	1
7_2_1	Fgf4	17.4714		2.56781	0.976006
7_2_10	Fgf4	14.1232		75.1889	0.944982
7_2_2	Fgf4	15.1514		26.655	0.908475
7_2_3	Fgf4	18.5842		0.835907	0.986919
7_2_4	Fgf4	18.3625		1.04532	0.966231
7_2_5	Fgf4	13.5167		138.615	0.987641
7_2_8	Fgf4	15.0503		29.5155	0.938334
7_2_L	Fgf4	11.3784		1197.92	0.957126
7_2_S	Fgf4	12.5511		367.064	0.995778
7_3_1	Fgf4	13.1197		206.873	0.935192
7_3_2	Fgf4	11.77		807.012	1
7_3_3	Fgf4	15.1991		25.4034	0.955675
7_3_4	Fgf4	13.0729		216.865	0.940108
7_3_5	Fgf4	18.2668		1.15129	0.967956
7_3_L	Fgf4	12.762		296.725	1
7_3_S	Fgf4	12.4867		391.709	0.977892
8_1	Fgf4	13.5229		137.747	0.994917
8_2	Fgf4	12.829		277.334	1
8_3	Fgf4	12.2496		497.533	0.972491
C0	Fgf4	13.7026		114.912	1
C1	Fgf4	15.7118		15.146	1
C2	Fgf4	16.8941		4.59648	1
C3	Fgf4	999		-1	0
H2O	Fgf4	999		-1	0
1_1	Fgf8a
1_2	Fgf8a
1_3	Fgf8a
2_1	Fgf8a
2_2	Fgf8a
2_3	Fgf8a
3_1	Fgf8a
3_2	Fgf8a
3_3	Fgf8a
4_1	Fgf8a
4_2	Fgf8a
4_3	Fgf8a
5_1	Fgf8a
5_2	Fgf8a
5_3	Fgf8a
6_1	Fgf8a
6_2	Fgf8a
6_3	Fgf8a
7_1_2	Fgf8a
7_1_3	Fgf8a
7_1_4	Fgf8a
7_1_5	Fgf8a
7_1_L	Fgf8a
7_1_S	Fgf8a
7_2_1	Fgf8a
7_2_10	Fgf8a
7_2_2	Fgf8a
7_2_3	Fgf8a
7_2_4	Fgf8a
7_2_5	Fgf8a
7_2_8	Fgf8a
7_2_L	Fgf8a
7_2_S	Fgf8a
7_3_1	Fgf8a
7_3_2	Fgf8a
7_3_3	Fgf8a
7_3_4	Fgf8a
7_3_5	Fgf8a
7_3_L	Fgf8a
7_3_S	Fgf8a
8_1	Fgf8a
8_2	Fgf8a
8_3	Fgf8a
C0	Fgf8a
C1	Fgf8a
C2	Fgf8a
C3	Fgf8a
H2O	Fgf8a
1_1	Fgfr4	9.70981		109.058	1
1_2	Fgfr4	9.65203		112.741	1
1_3	Fgfr4	9.49584		123.33	1
2_1	Fgfr4	11.5		38.9791	0
2_2	Fgfr4	10.6536		63.4004	1
2_3	Fgfr4	10.0024		92.1807	0.953342
3_1	Fgfr4	9.91096		97.1526	1
3_2	Fgfr4	9.48666		123.982	1
3_3	Fgfr4	9.56848		118.287	1
4_1	Fgfr4	9.87355		99.264	1
4_2	Fgfr4	10.4236		72.3592	1
4_3	Fgfr4	9.30504		137.623	0.998481
5_1	Fgfr4	9.82714		101.947	1
5_2	Fgfr4	9.87659		99.0907	1
5_3	Fgfr4	9.85879		100.109	1
6_1	Fgfr4	10.1517		84.599	0.967247
6_2	Fgfr4	9.96252		94.3155	1
6_3	Fgfr4	9.91441		96.96	1
7_1_2	Fgfr4	11.1254		48.3427	0.977724
7_1_3	Fgfr4	11.1753		46.9769	0.968292
7_1_4	Fgfr4	10.3054		77.4472	1
7_1_5	Fgfr4	10.8441		56.8264	1
7_1_L	Fgfr4	10.6804		62.4323	1
7_1_S	Fgfr4	10.13		85.6616	1
7_2_1	Fgfr4	13.9795		9.37486	1
7_2_10	Fgfr4	12.2286		25.6439	0.988594
7_2_2	Fgfr4	13.1039		15.5061	0.889889
7_2_3	Fgfr4	12.843		18.0141	1
7_2_4	Fgfr4	14.5036		6.93648	1
7_2_5	Fgfr4	12.6111		20.5832	1
7_2_8	Fgfr4	13.0762		15.7547	1
7_2_L	Fgfr4	8.97523		166.345	1
7_2_S	Fgfr4	10.5871		65.8689	1
7_3_1	Fgfr4	10.6336		64.1318	1
7_3_2	Fgfr4	10.1398		85.1794	1
7_3_3	Fgfr4	14.2307		8.11442	1
7_3_4	Fgfr4	10.6496		63.5456	1
7_3_5	Fgfr4	16.1327		2.71974	0.988583
7_3_L	Fgfr4	10.3513		75.4284	1
7_3_S	Fgfr4	9.94495		95.2731	1
8_1	Fgfr4	10.6513		63.4832	1
8_2	Fgfr4	10.6082		65.0752	1
8_3	Fgfr4	9.39507		130.683	1
C0	Fgfr4	10.1277		85.7745	0.980807
C1	Fgfr4	12.4254		22.9007	1
C2	Fgfr4	15.1318		4.83445	0.95531
C3	Fgfr4	18.5602		0.673946	0.97396
H2O	Fgfr4	999		-1	0
1_1	foxo3a	7.28643		129.344	0.961353
1_2	foxo3a	7.28185		129.771	0.964478
1_3	foxo3a	7.23244		134.465	0.947208
2_1	foxo3a	999		-1	0
2_2	foxo3a	7.90159		83.1089	1
2_3	foxo3a	7.83589		87.1294	1
3_1	foxo3a	7.87686		84.5999	1
3_2	foxo3a	6.96976		162.419	1
3_3	foxo3a	6.91769		168.615	1
4_1	foxo3a	7.69617		96.3376	1
4_2	foxo3a	7.78877		90.1317	1
4_3	foxo3a	7.0726		150.842	0.90623
5_1	foxo3a	7.62042		101.731	1
5_2	foxo3a	7.74772		92.8319	1
5_3	foxo3a	8.04533		74.9482	0.899815
6_1	foxo3a	7.95698		79.8639	1
6_2	foxo3a	7.67134		98.073	1
6_3	foxo3a	7.73926		93.3985	1
7_1_2	foxo3a	10.0775		17.3845	0.893774
7_1_3	foxo3a	10.0539		17.6816	0.914719
7_1_4	foxo3a	10.6519		11.5028	1
7_1_5	foxo3a	8.77973		44.2003	1
7_1_L	foxo3a	8.19414		67.3428	0.955172
7_1_S	foxo3a	8.89694		40.6277	1
7_2_1	foxo3a	12.5349		2.97016	1
7_2_10	foxo3a	10.9191		9.4916	1
7_2_2	foxo3a	13.9732		1.05589	1
7_2_3	foxo3a	13.4998		1.48411	1
7_2_4	foxo3a	16.1887		0.214674	0.964007
7_2_5	foxo3a	10.731		10.8664	1
7_2_8	foxo3a	12.1401		3.94507	0.953344
7_2_L	foxo3a	8.43544		56.6156	0.978055
7_2_S	foxo3a	9.56335		25.1604	0.999234
7_3_1	foxo3a	9.59037		24.6762	1
7_3_2	foxo3a	9.46908		26.9249	1
7_3_3	foxo3a	12.3068		3.49949	0.998736
7_3_4	foxo3a	9.47447		26.8209	1
7_3_5	foxo3a	17.4226		0.0884011	0.972274
7_3_L	foxo3a	8.89152		40.7863	1
7_3_S	foxo3a	9.49092		26.5055	1
8_1	foxo3a	8.10727		71.6832	0.919686
8_2	foxo3a	7.91588		82.2592	1
8_3	foxo3a	8.00128		77.3598	0.894254
C0	foxo3a	7.68955		96.7969	1
C1	foxo3a	9.68628		23.0318	1
C2	foxo3a	12.3776		3.32566	1
C3	foxo3a	14.2534		0.863201	0.998312
H2O	foxo3a	999		-1	0
1_1	gadd45aa	10.4919		115.559	1
1_2	gadd45aa	9.47724		257.297	1
1_3	gadd45aa	9.81965		196.389	1
2_1	gadd45aa	3.24171		35225.5	0.359466
2_2	gadd45aa	10.8975		83.9089	1
2_3	gadd45aa	10.5953		106.499	1
3_1	gadd45aa	10.6089		105.366	1
3_2	gadd45aa	9.61672		230.487	1
3_3	gadd45aa	9.96373		175.287	1
4_1	gadd45aa	10.1968		145.849	1
4_2	gadd45aa	10.6677		100.587	1
4_3	gadd45aa	8.86046		418.559	1
5_1	gadd45aa	8.83431		427.281	1
5_2	gadd45aa	9.97364		173.922	1
5_3	gadd45aa	9.67698		219.786	1
6_1	gadd45aa	10.1941		146.16	0.996452
6_2	gadd45aa	8.8856		410.339	1
6_3	gadd45aa	9.51533		249.68	1
7_1_2	gadd45aa	9.82698		195.256	1
7_1_3	gadd45aa	10.463		118.221	1
7_1_4	gadd45aa	10.3991		124.329	1
7_1_5	gadd45aa	10.7837		91.7946	1
7_1_L	gadd45aa	9.98108		172.904	1
7_1_S	gadd45aa	8.84014		425.323	1
7_2_1	gadd45aa	12.6676		20.765	1
7_2_10	gadd45aa	11.4276		55.2316	1
7_2_2	gadd45aa	9.8925		185.42	1
7_2_3	gadd45aa	10.8527		86.9326	1
7_2_4	gadd45aa	13.6513		9.55698	1
7_2_5	gadd45aa	11.3295		59.6788	1
7_2_8	gadd45aa	12.4642		24.3796	1
7_2_L	gadd45aa	8.72108		467.209	1
7_2_S	gadd45aa	9.72336		211.889	1
7_3_1	gadd45aa	9.58038		237.19	1
7_3_2	gadd45aa	9.51124		250.487	1
7_3_3	gadd45aa	12.6641		20.8238	1
7_3_4	gadd45aa	9.7815		202.39	1
7_3_5	gadd45aa	13.0115		15.8315	1
7_3_L	gadd45aa	9.51863		249.031	1
7_3_S	gadd45aa	9.40794		271.755	1
8_1	gadd45aa	10.6828		99.3962	1
8_2	gadd45aa	10.622		104.28	1
8_3	gadd45aa	7.96562		847.902	1
C0	gadd45aa	10.5327		111.899	1
C1	gadd45aa	12.6939		20.3389	1
C2	gadd45aa	15.2254		2.76048	1
C3	gadd45aa	16.489		1.01869	1
H2O	gadd45aa	999		-1	0
1_1	gadd45ab	8.55011		156.122	1
1_2	gadd45ab	8.19503		208.343	1
1_3	gadd45ab	8.78977		128.493	1
2_1	gadd45ab	2.5		21316.3	0.0712438
2_2	gadd45ab	9.18786		92.9786	0.98379
2_3	gadd45ab	9.35211		81.361	1
3_1	gadd45ab	9.43628		75.9816	1
3_2	gadd45ab	8.62089		147.395	1
3_3	gadd45ab	8.55978		154.899	1
4_1	gadd45ab	9.06882		102.423	1
4_2	gadd45ab	9.23863		89.2209	1
4_3	gadd45ab	8.35488		182.964	1
5_1	gadd45ab	8.60976		148.735	1
5_2	gadd45ab	8.55042		156.082	1
5_3	gadd45ab	9.26655		87.2194	1
6_1	gadd45ab	9.36294		80.6476	1
6_2	gadd45ab	8.0991		225.236	1
6_3	gadd45ab	9.32489		83.1806	1
7_1_2	gadd45ab	10.0942		44.5172	0.979696
7_1_3	gadd45ab	10.1406		42.8696	0.992668
7_1_4	gadd45ab	9.62789		65.0258	1
7_1_5	gadd45ab	10.4259		33.9971	1
7_1_L	gadd45ab	9.19802		92.214	1
7_1_S	gadd45ab	8.98481		109.659	1
7_2_1	gadd45ab	13.2053		3.55234	0.990308
7_2_10	gadd45ab	11.2865		16.8938	1
7_2_2	gadd45ab	11.3111		16.5588	0.989536
7_2_3	gadd45ab	11.1293		19.1955	0.980032
7_2_4	gadd45ab	14.5767		1.16552	1
7_2_5	gadd45ab	11.0702		20.1391	0.966993
7_2_8	gadd45ab	12.4007		6.83117	1
7_2_L	gadd45ab	8.91872		115.71	1
7_2_S	gadd45ab	9.71914		60.3782	1
7_3_1	gadd45ab	9.40632		77.8543	1
7_3_2	gadd45ab	9.65987		63.3577	1
7_3_3	gadd45ab	12.6101		5.76222	1
7_3_4	gadd45ab	10.074		45.251	1
7_3_5	gadd45ab	13.4663		2.87353	1
7_3_L	gadd45ab	9.75303		58.738	1
7_3_S	gadd45ab	9.46354		74.3171	1
8_1	gadd45ab	9.8669		53.5465	1
8_2	gadd45ab	9.36207		80.7047	1
8_3	gadd45ab	8.51286		160.92	1
C0	gadd45ab	8.95297		112.534	1
C1	gadd45ab	11.1269		19.2336	1
C2	gadd45ab	13.399		3.03495	1
C3	gadd45ab	14.7972		0.974285	1
H2O	gadd45ab	999		-1	0
1_1	hdac1	8.55126		99.8747	0.980182
1_2	hdac1	8.39736		110.347	0.960989
1_3	hdac1	8.2044		125.043	0.919199
2_1	hdac1	999		-1	0
2_2	hdac1	9.39883		57.6703	0.897876
2_3	hdac1	8.74108		88.3161	1
3_1	hdac1	9.09918		70.028	0.912177
3_2	hdac1	7.9352		148.871	1
3_3	hdac1	8.03296		139.734	0.92291
4_1	hdac1	8.64099		94.2337	1
4_2	hdac1	8.87047		81.2142	1
4_3	hdac1	7.80403		162.078	1
5_1	hdac1	8.1309		131.142	0.904668
5_2	hdac1	8.23097		122.909	0.927134
5_3	hdac1	8.60331		96.5622	0.972727
6_1	hdac1	8.23609		122.502	0.901146
6_2	hdac1	8.25397		121.091	0.948684
6_3	hdac1	8.22719		123.21	0.969375
7_1_2	hdac1	9.50705		53.765	0.9307
7_1_3	hdac1	8.97789		75.7535	0.986116
7_1_4	hdac1	8.81796		84.0247	0.990696
7_1_5	hdac1	8.7651		86.9525	1
7_1_L	hdac1	8.98877		75.2216	1
7_1_S	hdac1	8.21269		124.374	0.970167
7_2_1	hdac1	11.9414		11.1041	1
7_2_10	hdac1	10.0415		38.0292	0.902967
7_2_2	hdac1	11.4491		15.276	0.920658
7_2_3	hdac1	11.921		11.2522	0.986401
7_2_4	hdac1	14.111		2.72252	0.897788
7_2_5	hdac1	10.1494		35.4609	0.876802
7_2_8	hdac1	11.6686		13.2509	0.983017
7_2_L	hdac1	7.96011		146.488	1
7_2_S	hdac1	8.80903		84.5125	0.990408
7_3_1	hdac1	9.34484		59.7234	0.914446
7_3_2	hdac1	8.41207		109.301	0.958994
7_3_3	hdac1	11.5333		14.4652	0.976689
7_3_4	hdac1	9.05583		72.0232	0.924512
7_3_5	hdac1	13.0498		5.41476	0.947357
7_3_L	hdac1	8.63982		94.305	0.967639
7_3_S	hdac1	8.34849		113.897	0.94069
8_1	hdac1	9.28684		62.0107	0.933376
8_2	hdac1	9.07152		71.2947	0.913385
8_3	hdac1	8.09214		134.478	0.92343
C0	hdac1	8.69496		90.995	0.996972
C1	hdac1	10.7226		24.46	0.97899
C2	hdac1	13.7017		3.54939	0.994675
C3	hdac1	15.9817		0.810124	1
H2O	hdac1	999		-1	0
1_1	Ifg1rb	8.88809		122.053	1
1_2	Ifg1rb	8.7776		132.005	1
1_3	Ifg1rb	8.95167		116.67	1
2_1	Ifg1rb	38.5		9.18151e-08	0
2_2	Ifg1rb	9.69917		68.6512	1
2_3	Ifg1rb	9.30216		90.9851	1
3_1	Ifg1rb	9.42176		83.5835	1
3_2	Ifg1rb	8.49853		160.907	1
3_3	Ifg1rb	8.48169		162.841	1
4_1	Ifg1rb	9.24733		94.5941	1
4_2	Ifg1rb	9.19861		97.9207	1
4_3	Ifg1rb	8.09645		214.022	1
5_1	Ifg1rb	8.5475		155.413	1
5_2	Ifg1rb	9.40082		84.8349	1
5_3	Ifg1rb	9.4587		81.4216	1
6_1	Ifg1rb	9.57656		74.8904	1
6_2	Ifg1rb	9.36256		87.1686	1
6_3	Ifg1rb	9.22316		96.23	1
7_1_2	Ifg1rb	11.0481		26.3652	1
7_1_3	Ifg1rb	10.7144		33.4076	1
7_1_4	Ifg1rb	10.1836		48.6831	1
7_1_5	Ifg1rb	10.5719		36.9619	1
7_1_L	Ifg1rb	9.43512		82.7949	1
7_1_S	Ifg1rb	9.24183		94.964	1
7_2_1	Ifg1rb	13.2718		5.44389	1
7_2_10	Ifg1rb	11.2024		23.6312	1
7_2_2	Ifg1rb	12.045		12.9979	0.98543
7_2_3	Ifg1rb	12.2837		10.973	1
7_2_4	Ifg1rb	14.6242		2.08559	1
7_2_5	Ifg1rb	11.9575		13.8306	1
7_2_8	Ifg1rb	12.5136		9.32162	1
7_2_L	Ifg1rb	8.96063		115.93	1
7_2_S	Ifg1rb	9.93296		58.1591	1
7_3_1	Ifg1rb	9.64753		71.2132	1
7_3_2	Ifg1rb	9.70416		68.409	1
7_3_3	Ifg1rb	13.2169		5.66001	1
7_3_4	Ifg1rb	9.91979		58.7048	1
7_3_5	Ifg1rb	15.3254		1.26818	1
7_3_L	Ifg1rb	9.62594		72.3125	1
7_3_S	Ifg1rb	9.4549		81.6412	1
8_1	Ifg1rb	9.14093		102.011	1
8_2	Ifg1rb	9.55208		76.2026	1
8_3	Ifg1rb	8.60493		149.208	1
C0	Ifg1rb	9.27938		92.4676	1
C1	Ifg1rb	11.2923		22.1719	1
C2	Ifg1rb	13.6657		4.11668	1
C3	Ifg1rb	16.0502		0.7583	1
H2O	Ifg1rb	999		-1	0
1_1	Igf1	12.555		149.475	1
1_2	Igf1	12.7032		135.129	1
1_3	Igf1	12.628		142.229	1
2_1	Igf1	2.5		140324	0
2_2	Igf1	13.191		96.952	0.994726
2_3	Igf1	13.5574		75.5492	1
3_1	Igf1	13.5017		78.4678	1
3_2	Igf1	12.2716		181.275	1
3_3	Igf1	12.264		182.219	1
4_1	Igf1	13.1457		99.9873	1
4_2	Igf1	13.2725		91.7157	1
4_3	Igf1	11.9432		226.696	1
5_1	Igf1	12.3788		168.522	1
5_2	Igf1	12.6312		141.917	1
5_3	Igf1	13.3132		89.213	1
6_1	Igf1	12.5904		145.912	1
6_2	Igf1	13.2103		95.6854	1
6_3	Igf1	12.8484		122.418	1
7_1_2	Igf1	15.2428		23.9869	1
7_1_3	Igf1	15.195		24.7797	1
7_1_4	Igf1	13.7228		67.5027	1
7_1_5	Igf1	13.2884		90.7309	1
7_1_L	Igf1	13.3363		87.8191	1
7_1_S	Igf1	13.7276		67.2852	1
7_2_1	Igf1	17.9634		3.7642	1
7_2_10	Igf1	16.2612		11.9921	1
7_2_2	Igf1	15.8866		15.4753	1
7_2_3	Igf1	16.622		9.3808	1
7_2_4	Igf1	19.3888		1.42654	1
7_2_5	Igf1	15.9791		14.5316	1
7_2_8	Igf1	17.3908		5.55863	1
7_2_L	Igf1	12.6803		137.251	1
7_2_S	Igf1	14.0643		53.5016	0.983222
7_3_1	Igf1	15.585		19.0029	1
7_3_2	Igf1	14.0153		55.3171	0.996033
7_3_3	Igf1	18.7593		2.18967	1
7_3_4	Igf1	14.7792		32.8879	1
7_3_5	Igf1	19.7571		1.11024	1
7_3_L	Igf1	13.629		71.9551	1
7_3_S	Igf1	14.1274		51.2539	1
8_1	Igf1	13.1587		99.1085	1
8_2	Igf1	13.5496		75.9489	1
8_3	Igf1	12.7858		127.746	1
C0	Igf1	13.0462		106.991	0.999725
C1	Igf1	15.2535		23.8127	1
C2	Igf1	18.6846		2.30388	1
C3	Igf1	19.7836		1.09034	1
H2O	Igf1	999		-1	0
1_1	Igf1ra	8.67444		127.165	1
1_2	Igf1ra	8.22895		177.02	0.975139
1_3	Igf1ra	8.87799		109.326	1
2_1	Igf1ra	9.41867		73.1767	1
2_2	Igf1ra	9.35081		76.9584	0.961362
2_3	Igf1ra	9.1825		87.203	0.953058
3_1	Igf1ra	9.30896		79.3873	0.973785
3_2	Igf1ra	8.48432		146.445	1
3_3	Igf1ra	8.30671		167.089	1
4_1	Igf1ra	8.94028		104.385	1
4_2	Igf1ra	8.74843		120.367	1
4_3	Igf1ra	8.18676		182.654	0.959521
5_1	Igf1ra	8.33819		163.228	0.964615
5_2	Igf1ra	8.96397		102.565	1
5_3	Igf1ra	9.09603		92.9853	0.933067
6_1	Igf1ra	9.16238		88.5154	0.939679
6_2	Igf1ra	8.72725		122.275	1
6_3	Igf1ra	8.61154		133.245	1
7_1_2	Igf1ra	10.3781		35.8912	0.976213
7_1_3	Igf1ra	10.1504		42.5031	0.948503
7_1_4	Igf1ra	9.89056		51.5471	1
7_1_5	Igf1ra	10.1516		42.4632	0.974315
7_1_L	Igf1ra	9.0723		94.6382	0.946396
7_1_S	Igf1ra	8.68144		126.505	1
7_2_1	Igf1ra	12.7957		5.9618	1
7_2_10	Igf1ra	10.8096		26.0512	1
7_2_2	Igf1ra	12.5089		7.37686	0.974373
7_2_3	Igf1ra	12.1141		9.88938	0.928008
7_2_4	Igf1ra	13.8652		2.69468	1
7_2_5	Igf1ra	11.6604		13.8516	1
7_2_8	Igf1ra	12.6776		6.50833	1
7_2_L	Igf1ra	8.74203		120.94	1
7_2_S	Igf1ra	9.30564		79.5832	0.964097
7_3_1	Igf1ra	9.44758		71.6231	0.96542
7_3_2	Igf1ra	9.58158		64.8398	1
7_3_3	Igf1ra	12.8162		5.87181	1
7_3_4	Igf1ra	9.80101		55.0911	1
7_3_5	Igf1ra	14.5896		1.57363	1
7_3_L	Igf1ra	9.57374		65.2181	1
7_3_S	Igf1ra	9.12421		91.0604	0.943231
8_1	Igf1ra	8.76491		118.902	1
8_2	Igf1ra	9.23006		84.1772	0.985786
8_3	Igf1ra	8.63706		130.743	1
C0	Igf1ra	9.02375		98.1121	0.924741
C1	Igf1ra	10.9806		22.9457	1
C2	Igf1ra	13.6263		3.21773	1
C3	Igf1ra	15.367		0.8835	1
H2O	Igf1ra	999		-1	0
1_1	jmjd6	9.17174		100.949	1
1_2	jmjd6	9.85195		68.6761	1
1_3	jmjd6	10.1586		57.7287	1
2_1	jmjd6	12.5		15.3289	0.981609
2_2	jmjd6	10.9687		36.4867	1
2_3	jmjd6	10.6246		44.3362	1
3_1	jmjd6	10.0726		60.6083	0.99735
3_2	jmjd6	9.87526		67.7752	1
3_3	jmjd6	9.88315		67.4731	1
4_1	jmjd6	9.83697		69.2609	1
4_2	jmjd6	10.6402		43.9468	1
4_3	jmjd6	9.64346		77.2829	1
5_1	jmjd6	9.01721		110.182	0.977821
5_2	jmjd6	9.96234		64.5141	1
5_3	jmjd6	10.2455		54.9566	1
6_1	jmjd6	9.30851		93.4257	1
6_2	jmjd6	9.69522		75.0505	1
6_3	jmjd6	10.3109		52.9562	1
7_1_2	jmjd6	10.921		37.485	1
7_1_3	jmjd6	9.87277		67.8709	1
7_1_4	jmjd6	9.47407		85.0641	1
7_1_5	jmjd6	10.8403		39.2392	1
7_1_L	jmjd6	9.71335		74.2838	1
7_1_S	jmjd6	9.15338		102.005	1
7_2_1	jmjd6	13.4306		9.04952	1
7_2_10	jmjd6	11.9368		21.0883	1
7_2_2	jmjd6	12.3318		16.8611	0.979057
7_2_3	jmjd6	11.8622		21.9973	1
7_2_4	jmjd6	14.8902		3.95954	1
7_2_5	jmjd6	11.7522		23.4121	1
7_2_8	jmjd6	13.1821		10.4172	1
7_2_L	jmjd6	9.27101		95.4306	1
7_2_S	jmjd6	10.1913		56.6679	0.98978
7_3_1	jmjd6	10.4197		49.7935	1
7_3_2	jmjd6	10.0265		62.2121	0.990943
7_3_3	jmjd6	13.7342		7.61986	1
7_3_4	jmjd6	10.4463		49.0494	1
7_3_5	jmjd6	14.6286		4.59183	1
7_3_L	jmjd6	10.5004		47.5694	1
7_3_S	jmjd6	9.76871		71.9911	1
8_1	jmjd6	10.5863		45.3104	1
8_2	jmjd6	11.1307		33.2894	1
8_3	jmjd6	9.8209		69.8941	1
C0	jmjd6	9.64111		77.3861	1
C1	jmjd6	11.86		22.0248	1
C2	jmjd6	13.8548		7.11716	1
C3	jmjd6	18.4492		0.527592	1
H2O	jmjd6	999		-1	0
1_1	kdm2aa	8.51513		117.953	1
1_2	kdm2aa	8.69205		104.156	1
1_3	kdm2aa	8.94984		86.8897	1
2_1	kdm2aa	36.4178		3.55852e-07	0
2_2	kdm2aa	9.4859		59.6039	1
2_3	kdm2aa	9.38695		63.8984	1
3_1	kdm2aa	9.06237		80.2792	1
3_2	kdm2aa	8.50874		118.485	1
3_3	kdm2aa	8.73635		100.962	1
4_1	kdm2aa	8.79823		96.6637	1
4_2	kdm2aa	9.00551		83.5541	1
4_3	kdm2aa	8.44117		124.25	1
5_1	kdm2aa	8.63257		108.605	1
5_2	kdm2aa	9.01699		82.8822	1
5_3	kdm2aa	9.29035		68.3891	1
6_1	kdm2aa	8.93753		87.6449	1
6_2	kdm2aa	8.85399		92.9474	1
6_3	kdm2aa	9.15019		75.4723	1
7_1_2	kdm2aa	10.753		24.454	1
7_1_3	kdm2aa	9.82809		46.8578	1
7_1_4	kdm2aa	10.2845		33.9942	1
7_1_5	kdm2aa	9.79898		47.8266	1
7_1_L	kdm2aa	8.88526		90.926	1
7_1_S	kdm2aa	8.99886		83.9456	1
7_2_1	kdm2aa	12.9286		5.29673	1
7_2_10	kdm2aa	11.2351		17.4238	1
7_2_2	kdm2aa	12.1273		9.30454	1
7_2_3	kdm2aa	13.3894		3.83073	1
7_2_4	kdm2aa	14.6182		1.61459	1
7_2_5	kdm2aa	11.4189		15.3106	1
7_2_8	kdm2aa	12.4139		7.60647	1
7_2_L	kdm2aa	8.7071		103.06	1
7_2_S	kdm2aa	9.66799		52.4409	1
7_3_1	kdm2aa	9.96386		42.5915	1
7_3_2	kdm2aa	9.30755		67.5673	1
7_3_3	kdm2aa	12.9958		5.05208	1
7_3_4	kdm2aa	9.98542		41.9507	1
7_3_5	kdm2aa	14.4657		1.79731	1
7_3_L	kdm2aa	9.38701		63.8954	1
7_3_S	kdm2aa	9.16266		74.8135	1
8_1	kdm2aa	9.32929		66.5419	1
8_2	kdm2aa	9.49725		59.1299	1
8_3	kdm2aa	8.7924		97.0604	1
C0	kdm2aa	8.66695		106.011	1
C1	kdm2aa	10.9818		20.8198	1
C2	kdm2aa	13.6912		3.09825	1
C3	kdm2aa	15.3937		0.935915	1
H2O	kdm2aa	999		-1	0
1_1	kdm4b/jmjd2b	8.90853		104.42	1
1_2	kdm4b/jmjd2b	9.13687		90.1994	1
1_3	kdm4b/jmjd2b	9.13363		90.3874	1
2_1	kdm4b/jmjd2b	3.11045		4297.45	0.11
2_2	kdm4b/jmjd2b	9.34112		79.1284	1
2_3	kdm4b/jmjd2b	9.50632		71.1762	1
3_1	kdm4b/jmjd2b	9.48485		72.1626	1
3_2	kdm4b/jmjd2b	8.52206		133.781	1
3_3	kdm4b/jmjd2b	8.51417		134.459	1
4_1	kdm4b/jmjd2b	9.13122		90.5267	1
4_2	kdm4b/jmjd2b	9.39326		76.5272	1
4_3	kdm4b/jmjd2b	8.41915		142.905	1
5_1	kdm4b/jmjd2b	8.67696		121.133	1
5_2	kdm4b/jmjd2b	9.13402		90.3647	1
5_3	kdm4b/jmjd2b	9.33542		79.418	1
6_1	kdm4b/jmjd2b	9.5637		68.6051	1
6_2	kdm4b/jmjd2b	9.01028		97.8256	1
6_3	kdm4b/jmjd2b	9.10101		92.2976	1
7_1_2	kdm4b/jmjd2b	10.4776		38.1841	1
7_1_3	kdm4b/jmjd2b	10.7639		31.7821	1
7_1_4	kdm4b/jmjd2b	9.97845		52.5865	1
7_1_5	kdm4b/jmjd2b	10.8793		29.5142	1
7_1_L	kdm4b/jmjd2b	9.18302		87.5697	1
7_1_S	kdm4b/jmjd2b	9.44255		74.1464	1
7_2_1	kdm4b/jmjd2b	13.0994		7.11001	1
7_2_10	kdm4b/jmjd2b	11.1817		24.3131	1
7_2_2	kdm4b/jmjd2b	12.6804		9.30126	1
7_2_3	kdm4b/jmjd2b	12.7619		8.82738	1
7_2_4	kdm4b/jmjd2b	14.7114		2.52946	1
7_2_5	kdm4b/jmjd2b	11.7351		17.0506	1
7_2_8	kdm4b/jmjd2b	13.2882		6.29936	0.999314
7_2_L	kdm4b/jmjd2b	9.53646		69.8139	1
7_2_S	kdm4b/jmjd2b	9.86902		56.4084	1
7_3_1	kdm4b/jmjd2b	10.3815		40.612	1
7_3_2	kdm4b/jmjd2b	9.89306		55.5457	1
7_3_3	kdm4b/jmjd2b	13.7889		4.56955	1
7_3_4	kdm4b/jmjd2b	9.88017		56.0067	1
7_3_5	kdm4b/jmjd2b	14.9146		2.22048	1
7_3_L	kdm4b/jmjd2b	10.067		49.6831	0.993941
7_3_S	kdm4b/jmjd2b	10.3408		41.6849	1
8_1	kdm4b/jmjd2b	9.59366		67.3	1
8_2	kdm4b/jmjd2b	9.32176		80.1168	1
8_3	kdm4b/jmjd2b	9.01914		97.2714	1
C0	kdm4b/jmjd2b	9.11168		91.6683	1
C1	kdm4b/jmjd2b	11.3344		22.0462	1
C2	kdm4b/jmjd2b	13.8934		4.2736	1
C3	kdm4b/jmjd2b	16.6263		0.741024	1
H2O	kdm4b/jmjd2b	999		-1	0
1_1	lats1	9.15892		119.441	1
1_2	lats1	9.60987		89.1415	1
1_3	lats1	9.54755		92.8199	1
2_1	lats1	999		-1	0
2_2	lats1	10.1383		63.2677	0.966004
2_3	lats1	9.84321		76.6176	1
3_1	lats1	9.86012		75.7816	1
3_2	lats1	9.258		112.004	1
3_3	lats1	9.4363		99.7681	1
4_1	lats1	9.51203		94.9843	1
4_2	lats1	9.98987		69.663	1
4_3	lats1	9.30256		108.812	1
5_1	lats1	9.47532		97.2739	1
5_2	lats1	9.59585		89.9566	1
5_3	lats1	10.237		59.3407	1
6_1	lats1	9.59768		89.8496	1
6_2	lats1	9.73021		82.4463	1
6_3	lats1	9.98211		70.0144	1
7_1_2	lats1	11.917		19.9502	1
7_1_3	lats1	11.071		34.5433	0.992177
7_1_4	lats1	11.6085		24.3726	1
7_1_5	lats1	10.4825		50.6042	1
7_1_L	lats1	9.82383		77.5871	1
7_1_S	lats1	10.3415		55.4533	1
7_2_1	lats1	14.7357		3.20401	1
7_2_10	lats1	12.9307		10.3347	1
7_2_2	lats1	14.0366		5.04296	0.920983
7_2_3	lats1	14.3261		4.17938	1
7_2_4	lats1	14.8687		2.9391	1
7_2_5	lats1	12.3263		15.2971	0.981356
7_2_8	lats1	13.6943		6.29683	1
7_2_L	lats1	10.0335		67.7194	0.976412
7_2_S	lats1	11.2119		31.5253	0.9876
7_3_1	lats1	11.6623		23.5363	1
7_3_2	lats1	10.9121		38.2943	1
7_3_3	lats1	14.4388		3.88467	1
7_3_4	lats1	11.0556		34.8885	1
7_3_5	lats1	15.4061		2.07388	1
7_3_L	lats1	10.544		48.6231	1
7_3_S	lats1	10.9318		37.8084	1
8_1	lats1	10.4189		52.7345	1
8_2	lats1	10.404		53.2491	1
8_3	lats1	9.91304		73.2234	1
C0	lats1	9.67311		85.5583	1
C1	lats1	11.5872		24.7118	1
C2	lats1	14.3246		4.18337	1
C3	lats1	17.0289		0.723582	1
H2O	lats1	999		-1	0
1_1	lin28a	13.5971		139.567	1
1_2	lin28a	12.6135		325.18	1
1_3	lin28a	13.4835		153.883	1
2_1	lin28a	2.5		1.94621e+06	0.139949
2_2	lin28a	14.3581		72.535	0.988617
2_3	lin28a	13.7898		118.255	1
3_1	lin28a	13.9736		100.958	1
3_2	lin28a	12.7504		289.061	1
3_3	lin28a	12.8148		273.492	1
4_1	lin28a	13.9079		106.831	1
4_2	lin28a	14.0852		91.7199	1
4_3	lin28a	11.9947		553.622	1
5_1	lin28a	13.6541		132.883	1
5_2	lin28a	13.3109		178.509	1
5_3	lin28a	13.4864		153.498	1
6_1	lin28a	13.8409		113.168	1
6_2	lin28a	12.1466		485.848	1
6_3	lin28a	13.4235		162.03	1
7_1_2	lin28a	12.8404		267.523	1
7_1_3	lin28a	14.1532		86.5107	1
7_1_4	lin28a	11.7206		700.806	1
7_1_5	lin28a	14.9606		43.2074	1
7_1_L	lin28a	13.7958		117.642	1
7_1_S	lin28a	12.0727		517.693	1
7_2_1	lin28a	16.5866		10.6732	1
7_2_10	lin28a	13.7143		126.182	1
7_2_2	lin28a	14.2053		82.7216	0.964491
7_2_3	lin28a	13.5473		145.675	1
7_2_4	lin28a	16.2101		14.7536	0.994188
7_2_5	lin28a	15.3879		29.9211	1
7_2_8	lin28a	15.1672		36.1737	1
7_2_L	lin28a	11.0726		1223.46	0.977639
7_2_S	lin28a	11.2744		1028.59	1
7_3_1	lin28a	11.8776		612.257	1
7_3_2	lin28a	11.9273		586.646	1
7_3_3	lin28a	15.4261		28.9522	1
7_3_4	lin28a	11.8644		619.246	1
7_3_5	lin28a	18.1726		2.72885	1
7_3_L	lin28a	13.8075		116.467	1
7_3_S	lin28a	11.6159		766.809	1
8_1	lin28a	14.8216		48.6942	1
8_2	lin28a	14.1558		86.3195	1
8_3	lin28a	11.1353		1159.25	1
C0	lin28a	13.8887		108.612	1
C1	lin28a	15.5569		25.8742	1
C2	lin28a	18.615		1.86534	1
C3	lin28a	19.1079		1.2209	1
H2O	lin28a	999		-1	0
1_1	mycb	8.507		139.367	1
1_2	mycb	8.05776		194.102	1
1_3	mycb	8.35756		155.603	1
2_1	mycb	999		-1	0
2_2	mycb	8.65143		125.286	1
2_3	mycb	9.23315		81.5837	1
3_1	mycb	9.28415		78.5727	1
3_2	mycb	7.8142		232.292	1
3_3	mycb	8.74195		117.197	1
4_1	mycb	8.9493		100.58	1
4_2	mycb	9.09405		90.3969	1
4_3	mycb	8.19931		174.864	1
5_1	mycb	8.68337		122.37	1
5_2	mycb	8.13374		183.527	1
5_3	mycb	9.02599		95.0492	1
6_1	mycb	9.16505		85.7858	1
6_2	mycb	7.95031		210.109	1
6_3	mycb	9.20861		83.0739	1
7_1_2	mycb	9.8964		50.0258	1
7_1_3	mycb	9.77057		54.8898	1
7_1_4	mycb	9.24298		80.9947	1
7_1_5	mycb	9.66299		59.4218	1
7_1_L	mycb	9.34146		75.3212	1
7_1_S	mycb	9.07391		91.7489	1
7_2_1	mycb	12.521		7.22189	1
7_2_10	mycb	10.4603		33.0071	1
7_2_2	mycb	10.4787		32.5623	1
7_2_3	mycb	10.9642		22.7626	1
7_2_4	mycb	13.033		4.95088	1
7_2_5	mycb	11.131		20.1286	1
7_2_8	mycb	11.9943		10.6494	1
7_2_L	mycb	8.20631		173.963	1
7_2_S	mycb	8.90115		104.215	1
7_3_1	mycb	9.48552		67.73	1
7_3_2	mycb	9.64999		59.994	1
7_3_3	mycb	12.3805		8.00993	1
7_3_4	mycb	9.75852		55.3796	1
7_3_5	mycb	16.2461		0.463067	1
7_3_L	mycb	9.25025		80.5618	1
7_3_S	mycb	9.08001		91.3377	1
8_1	mycb	9.68749		58.3577	1
8_2	mycb	8.8603		107.402	1
8_3	mycb	8.4082		149.9	1
C0	mycb	8.96666		99.3002	1
C1	mycb	10.9853		22.4111	1
C2	mycb	13.6023		3.25344	1
C3	mycb	15.3694		0.883941	1
H2O	mycb	999		-1	0
1_1	mycla	11.3344		102.891	1
1_2	mycla	11.5409		89.8471	1
1_3	mycla	11.5374		90.0574	1
2_1	mycla	37.5		3.59301e-06	0.01
2_2	mycla	12.3834		51.6893	0.985393
2_3	mycla	12.1851		58.8745	0.984406
3_1	mycla	11.6894		81.5055	1
3_2	mycla	11.385		99.5286	1
3_3	mycla	11.3631		100.967	1
4_1	mycla	11.3511		101.766	1
4_2	mycla	12.5092		47.5939	1
4_3	mycla	11.3657		100.795	1
5_1	mycla	11.813		75.1551	1
5_2	mycla	11.4024		98.4004	1
5_3	mycla	12.1683		59.5261	0.975901
6_1	mycla	11.3994		98.59	1
6_2	mycla	11.2866		106.17	1
6_3	mycla	11.627		84.916	1
7_1_2	mycla	12.725		41.3114	1
7_1_3	mycla	11.7677		77.4262	1
7_1_4	mycla	12.3801		51.8012	1
7_1_5	mycla	11.2102		111.626	1
7_1_L	mycla	12.2006		58.2792	0.99751
7_1_S	mycla	11.2804		106.599	1
7_2_1	mycla	14.7911		10.6475	1
7_2_10	mycla	13.1237		31.8008	0.970689
7_2_2	mycla	14.7433		10.9868	1
7_2_3	mycla	16.1511		4.36162	0.970302
7_2_4	mycla	17.5363		1.7575	1
7_2_5	mycla	13.9941		17.963	1
7_2_8	mycla	14.6051		12.0299	1
7_2_L	mycla	10.5413		173.141	1
7_2_S	mycla	11.5844		87.3194	1
7_3_1	mycla	12.8072		39.1417	1
7_3_2	mycla	11.927		69.7376	1
7_3_3	mycla	14.6542		11.6479	1
7_3_4	mycla	12.5017		47.8294	1
7_3_5	mycla	15.5961		6.27821	1
7_3_L	mycla	12.1009		62.2181	0.973136
7_3_S	mycla	11.8773		72.054	1
8_1	mycla	12.4929		48.108	1
8_2	mycla	12.6081		44.6037	1
8_3	mycla	11.4596		94.7748	1
C0	mycla	11.5646		88.4641	1
C1	mycla	13.5439		24.1363	1
C2	mycla	16.2956		3.96715	1
C3	mycla	18.8228		0.755552	1
H2O	mycla	999		-1	0
1_1	nanog	17.5519		49.725	1
1_2	nanog	18.6901		1841.63	1
1_3	nanog	18.4837		956.685	0.977159
2_1	nanog	14.1382		0.000981563	0.348297
2_2	nanog	18.8929		3505.6	0.941843
2_3	nanog	20.2392		251257	0.971189
3_1	nanog	19.0184		5219.88	0.927757
3_2	nanog	17.7941		107.235	1
3_3	nanog	17.658		69.6365	1
4_1	nanog	19.6344		36866.1	1
4_2	nanog	18.9271		3907.44	1
4_3	nanog	16.817		4.82821	1
5_1	nanog	17.8268		118.972	1
5_2	nanog	17.6592		69.9059	0.999888
5_3	nanog	17.9368		168.672	1
6_1	nanog	17.5409		48.0228	0.999951
6_2	nanog	17.3385		25.2653	0.993679
6_3	nanog	18.2639		476.282	0.983011
7_1_2	nanog	15.4056		0.0547842	0.984444
7_1_3	nanog	20.4822		543255	1
7_1_4	nanog	15.0065		0.0154379	0.942872
7_1_5	nanog	18.2504		456.246	0.989616
7_1_L	nanog	17.0659		10.6365	0.950731
7_1_S	nanog	15.5642		0.0906239	1
7_2_1	nanog	18.9588		4320.73	1
7_2_10	nanog	18.6473		1607.89	1
7_2_2	nanog	20.0938		158415	0.909083
7_2_3	nanog	19.3847		16693.2	0.987668
7_2_4	nanog	999		-1	0
7_2_5	nanog	17.3698		27.9016	0.979897
7_2_8	nanog	18.7339		2116.19	1
7_2_L	nanog	16.5485		2.05955	0.989486
7_2_S	nanog	15.7859		0.183122	1
7_3_1	nanog	17.2084		16.719	0.961405
7_3_2	nanog	14.6883		0.00562437	1
7_3_3	nanog	18.4338		816.661	0.976774
7_3_4	nanog	15.6882		0.134297	1
7_3_5	nanog	19.1474		7861.75	0.995261
7_3_L	nanog	17.0719		10.8412	0.938966
7_3_S	nanog	15.7747		0.176733	1
8_1	nanog	18.3424		611.056	0.987069
8_2	nanog	18.4791		942.835	0.97806
8_3	nanog	16.0177		0.382141	0.929537
C0	nanog	17.772		100	1
C1	nanog	17.2649		20	1
C2	nanog	999		-1	0
C3	nanog	999		-1	0
H2O	nanog	999		-1	0
1_1	neil1	8.98582		122.653	1
1_2	neil1	9.90989		62.5819	1
1_3	neil1	9.92731		61.7931	1
2_1	neil1	37.5		1.17843e-07	0
2_2	neil1	10.6688		36.0133	1
2_3	neil1	10.4076		43.5578	1
3_1	neil1	9.00048		121.35	0.974999
3_2	neil1	9.74656		70.4855	1
3_3	neil1	9.60206		78.3064	1
4_1	neil1	9.25849		100.565	1
4_2	neil1	10.8834		30.8016	1
4_3	neil1	10.0133		58.041	0.986699
5_1	neil1	9.56418		80.4965	1
5_2	neil1	9.87743		64.0783	1
5_3	neil1	10.5722		38.6351	1
6_1	neil1	9.23531		102.277	1
6_2	neil1	9.94405		61.0442	1
6_3	neil1	9.85009		65.3668	1
7_1_2	neil1	11.6614		17.4809	1
7_1_3	neil1	10.3052		46.9293	1
7_1_4	neil1	11.1232		25.8669	1
7_1_5	neil1	10.8965		30.51	1
7_1_L	neil1	9.5459		81.5749	1
7_1_S	neil1	9.37073		92.6729	1
7_2_1	neil1	13.5894		4.29368	1
7_2_10	neil1	11.7055		16.9276	1
7_2_2	neil1	13.0816		6.2146	0.961527
7_2_3	neil1	13.2495		5.49953	1
7_2_4	neil1	15.1677		1.36053	1
7_2_5	neil1	12.0026		13.6346	0.975307
7_2_8	neil1	14.1003		2.95984	1
7_2_L	neil1	9.76477		69.5568	1
7_2_S	neil1	10.5761		38.5273	1
7_3_1	neil1	11.2851		22.9905	1
7_3_2	neil1	10.0856		55.0639	1
7_3_3	neil1	13.7147		3.91935	1
7_3_4	neil1	10.982		28.6684	1
7_3_5	neil1	15.6539		0.954899	1
7_3_L	neil1	11.1024		26.2624	1
7_3_S	neil1	9.90594		62.7618	1
8_1	neil1	10.58		38.4187	1
8_2	neil1	10.2467		48.971	1
8_3	neil1	9.96098		60.2965	1
C0	neil1	9.18249		106.287	1
C1	neil1	11.3956		21.2124	1
C2	neil1	14.0996		2.96139	1
C3	neil1	15.6486		0.958545	1
H2O	neil1	999		-1	0
1_1	ogt,1	8.6997		105.85	1
1_2	ogt,1	8.98814		88.2648	1
1_3	ogt,1	8.86741		95.2386	1
2_1	ogt,1	3.28059		3214.09	0
2_2	ogt,1	10.1572		42.2662	0.960151
2_3	ogt,1	9.34237		70.614	1
3_1	ogt,1	8.8035		99.1502	1
3_2	ogt,1	8.79245		99.8429	1
3_3	ogt,1	9.03867		85.4998	0.978585
4_1	ogt,1	8.31026		135.275	1
4_2	ogt,1	9.10404		82.0508	1
4_3	ogt,1	8.35708		131.344	1
5_1	ogt,1	8.50367		119.76	1
5_2	ogt,1	8.97843		88.8063	1
5_3	ogt,1	9.1028		82.1149	0.968169
6_1	ogt,1	8.58943		113.462	1
6_2	ogt,1	9.18878		77.7863	0.990471
6_3	ogt,1	8.99024		88.1478	1
7_1_2	ogt,1	12.429		10.1056	0.895034
7_1_3	ogt,1	10.0282		45.8447	0.971392
7_1_4	ogt,1	11.2154		21.7037	0.920532
7_1_5	ogt,1	11.2344		21.4456	0.937009
7_1_L	ogt,1	8.79182		99.8828	1
7_1_S	ogt,1	9.26931		73.939	1
7_2_1	ogt,1	12.8247		7.87606	1
7_2_10	ogt,1	12.0505		12.8264	0.968425
7_2_2	ogt,1	12.6451		8.81969	1
7_2_3	ogt,1	14.0086		3.73653	0.928893
7_2_4	ogt,1	14.6454		2.50198	1
7_2_5	ogt,1	11.1575		22.5101	0.98881
7_2_8	ogt,1	14.6158		2.54896	0.952859
7_2_L	ogt,1	9.65058		58.1542	1
7_2_S	ogt,1	10.4797		34.4977	1
7_3_1	ogt,1	10.4881		34.3156	0.996516
7_3_2	ogt,1	10.3316		37.8705	1
7_3_3	ogt,1	12.5798		9.18981	1
7_3_4	ogt,1	10.8154		27.9225	1
7_3_5	ogt,1	15.8805		1.14924	1
7_3_L	ogt,1	9.37425		69.2102	1
7_3_S	ogt,1	9.79064		53.2434	1
8_1	ogt,1	8.87153		94.9913	1
8_2	ogt,1	9.77232		53.8615	1
8_3	ogt,1	9.26221		74.2705	1
C0	ogt,1	8.98135		88.6428	1
C1	ogt,1	11.2719		20.9442	1
C2	ogt,1	13.4727		5.23674	1
C3	ogt,1	16.7652		0.658281	1
H2O	ogt,1	999		-1	0
1_1	pou5f3	16.8771		-1	0.91762
1_2	pou5f3	17.559		-1	0.880521
1_3	pou5f3	17.0268		-1	0.851578
2_1	pou5f3	3.36877		-1	0.336952
2_2	pou5f3	16.551		-1	0.8683
2_3	pou5f3	17.6897		-1	0.916753
3_1	pou5f3	17.3092		-1	0.879917
3_2	pou5f3	15.7902		-1	0.971182
3_3	pou5f3	18.7872		-1	0.964069
4_1	pou5f3	17.0502		-1	0.86682
4_2	pou5f3	18.7187		-1	0.969006
4_3	pou5f3	17.0369		-1	0.829014
5_1	pou5f3	18.0478		-1	0.821134
5_2	pou5f3	16.2268		-1	0.847761
5_3	pou5f3	16.3511		-1	0.89681
6_1	pou5f3	18.1432		-1	0.882845
6_2	pou5f3	15.6839		-1	0.924825
6_3	pou5f3	19.3593		-1	0.905486
7_1_2	pou5f3	16.1628		-1	0.825147
7_1_3	pou5f3	15.8019		-1	0.901762
7_1_4	pou5f3	15.9051		-1	0.903314
7_1_5	pou5f3	18.9434		-1	0.965297
7_1_L	pou5f3	17.9604		-1	0.959894
7_1_S	pou5f3	14.5699		-1	0.899098
7_2_1	pou5f3	20.3114		-1	0.861639
7_2_10	pou5f3	17.0598		-1	0.811049
7_2_2	pou5f3	21.3784		-1	0.449453
7_2_3	pou5f3	18.1371		-1	0.842116
7_2_4	pou5f3	22.2023		-1	0.898502
7_2_5	pou5f3	18.2876		-1	0.825387
7_2_8	pou5f3	17.803		-1	0.902668
7_2_L	pou5f3	16.5531		-1	0.882855
7_2_S	pou5f3	15.5437		-1	0.879973
7_3_1	pou5f3	16.8267		-1	0.932134
7_3_2	pou5f3	15.0272		-1	0.830896
7_3_3	pou5f3	18.7782		-1	0.954254
7_3_4	pou5f3	14.7933		-1	0.965909
7_3_5	pou5f3	25.2065		-1	0.93941
7_3_L	pou5f3	18.4415		-1	0.865257
7_3_S	pou5f3	14.4962		-1	0.90195
8_1	pou5f3	20.4198		-1	0.851023
8_2	pou5f3	17.1849		-1	0.866743
8_3	pou5f3	15.5795		-1	0.869674
C0	pou5f3	999		-1	0
C1	pou5f3	999		-1	0
C2	pou5f3	999		-1	0
C3	pou5f3	999		-1	0
H2O	pou5f3	999		-1	0
1_1	Rarab	8.95282		128.192	1
1_2	Rarab	8.96498		127.051	1
1_3	Rarab	8.76476		147.195	1
2_1	Rarab	999		-1	0
2_2	Rarab	9.82341		67.5991	1
2_3	Rarab	9.18307		108.232	0.989928
3_1	Rarab	9.38314		93.4303	1
3_2	Rarab	8.58174		168.392	1
3_3	Rarab	8.64298		160.98	1
4_1	Rarab	9.19974		106.915	1
4_2	Rarab	9.3306		97.1095	1
4_3	Rarab	8.59296		167.008	1
5_1	Rarab	9.04773		119.553	0.962156
5_2	Rarab	8.96678		126.883	1
5_3	Rarab	9.34181		96.3128	1
6_1	Rarab	9.35069		95.6861	1
6_2	Rarab	8.74698		149.132	1
6_3	Rarab	8.87137		136.101	1
7_1_2	Rarab	10.4768		41.8172	1
7_1_3	Rarab	10.7797		33.4698	1
7_1_4	Rarab	10.0744		56.2125	0.960817
7_1_5	Rarab	9.86853		65.3941	1
7_1_L	Rarab	9.51215		84.9778	1
7_1_S	Rarab	9.52654		84.0834	1
7_2_1	Rarab	13.4489		4.70509	1
7_2_10	Rarab	11.3959		21.2795	1
7_2_2	Rarab	13.6069		4.18927	1
7_2_3	Rarab	13.288		5.29603	1
7_2_4	Rarab	15.1715		1.3264	0.984015
7_2_5	Rarab	11.7914		15.9115	1
7_2_8	Rarab	12.8561		7.27457	1
7_2_L	Rarab	9.05638		118.796	0.940364
7_2_S	Rarab	9.91781		63.0677	1
7_3_1	Rarab	10.4899		41.4176	1
7_3_2	Rarab	9.58716		80.4191	1
7_3_3	Rarab	13.3634		5.01041	1
7_3_4	Rarab	10.2435		49.6396	1
7_3_5	Rarab	15.9081		0.77182	1
7_3_L	Rarab	9.91433		63.2289	1
7_3_S	Rarab	9.70172		73.9247	1
8_1	Rarab	9.50217		85.6034	1
8_2	Rarab	9.35188		95.6019	1
8_3	Rarab	9.0752		117.163	0.980884
C0	Rarab	9.30451		98.9896	1
C1	Rarab	11.3358		22.2399	1
C2	Rarab	13.9172		3.33493	1
C3	Rarab	15.7425		0.871709	1
H2O	Rarab	999		-1	0
1_1	Rpl13a1	3.96499		104.566	0.654997
1_2	Rpl13a1	3.95462		105.393	0.65154
1_3	Rpl13a1	3.90919		109.094	0.636397
2_1	Rpl13a1	2.5		318.276	0.03
2_2	Rpl13a1	4.70696		59.5053	0.89077
2_3	Rpl13a1	4.13176		92.1209	0.64196
3_1	Rpl13a1	4.05528		97.6324	0.599038
3_2	Rpl13a1	3.9886		102.707	0.662866
3_3	Rpl13a1	3.80278		118.281	0.600927
4_1	Rpl13a1	3.86714		112.636	0.62238
4_2	Rpl13a1	4.52252		68.4568	0.840839
4_3	Rpl13a1	3.93326		107.117	0.644419
5_1	Rpl13a1	3.93508		106.969	0.645025
5_2	Rpl13a1	4.05732		97.4815	0.604773
5_3	Rpl13a1	4.42363		73.7984	0.774483
6_1	Rpl13a1	4.09754		94.5472	0.622015
6_2	Rpl13a1	4.09894		94.4473	0.643327
6_3	Rpl13a1	4.23844		84.9487	0.717086
7_1_2	Rpl13a1	5.47549		33.186	0.945804
7_1_3	Rpl13a1	4.76666		56.8664	0.922219
7_1_4	Rpl13a1	4.95976		49.106	0.986588
7_1_5	Rpl13a1	5.34259		36.7122	0.958693
7_1_L	Rpl13a1	4.56191		66.4381	0.853568
7_1_S	Rpl13a1	4.22793		85.6295	0.700014
7_2_1	Rpl13a1	7.27676		8.44451	0.904431
7_2_10	Rpl13a1	6.04676		21.5005	0.88519
7_2_2	Rpl13a1	6.90134		11.2319	0.972785
7_2_3	Rpl13a1	6.97526		10.6185	1
7_2_4	Rpl13a1	9.16884		2.00553	0.893685
7_2_5	Rpl13a1	6.07619		21.0252	0.878567
7_2_8	Rpl13a1	7.2922		8.34601	0.929747
7_2_L	Rpl13a1	4.4198		74.0134	0.754551
7_2_S	Rpl13a1	4.95495		49.2858	0.984985
7_3_1	Rpl13a1	4.90918		51.0302	0.969725
7_3_2	Rpl13a1	4.77336		56.5775	0.924453
7_3_3	Rpl13a1	7.30964		8.23619	0.922216
7_3_4	Rpl13a1	5.11657		43.5906	0.916644
7_3_5	Rpl13a1	9.05347		2.18927	0.906002
7_3_L	Rpl13a1	4.75426		57.4045	0.918087
7_3_S	Rpl13a1	4.61018		64.0457	0.861609
8_1	Rpl13a1	4.81422		54.8482	0.938072
8_2	Rpl13a1	4.24403		84.5886	0.701422
8_3	Rpl13a1	4.38043		76.2607	0.764753
C0	Rpl13a1	4.26751		83.0926	0.706812
C1	Rpl13a1	5.7195		27.5701	1
C2	Rpl13a1	8.37385		3.66908	0.942407
C3	Rpl13a1	10.4435		0.761417	0.981135
H2O	Rpl13a1	999		-1	0
1_1	Rpl13a2	3.77945		98.4942	0.593151
1_2	Rpl13a2	3.85369		93.006	0.617897
1_3	Rpl13a2	3.79093		97.6251	0.596977
2_1	Rpl13a2	18.5		0.00113746	0
2_2	Rpl13a2	4.58612		52.8254	0.802443
2_3	Rpl13a2	4.04612		80.1615	0.577078
3_1	Rpl13a2	4.0132		82.2258	0.548801
3_2	Rpl13a2	3.82413		95.1538	0.608043
3_3	Rpl13a2	3.6067		112.552	0.535567
4_1	Rpl13a2	3.75103		100.681	0.583676
4_2	Rpl13a2	4.32773		64.4928	0.733739
4_3	Rpl13a2	3.87683		91.3587	0.62561
5_1	Rpl13a2	3.93762		87.1687	0.645873
5_2	Rpl13a2	3.95054		86.3029	0.650181
5_3	Rpl13a2	4.2637		67.7625	0.673071
6_1	Rpl13a2	3.99378		83.4688	0.664592
6_2	Rpl13a2	3.89204		90.2914	0.630682
6_3	Rpl13a2	3.99477		83.4047	0.664924
7_1_2	Rpl13a2	5.08051		36.0595	0.840228
7_1_3	Rpl13a2	4.60063		52.2369	0.839721
7_1_4	Rpl13a2	4.83098		43.7235	0.94366
7_1_5	Rpl13a2	4.72636		47.4031	0.908785
7_1_L	Rpl13a2	4.1922		71.6097	0.655242
7_1_S	Rpl13a2	4.04494		80.2351	0.604058
7_2_1	Rpl13a2	7.2191		6.91362	0.874122
7_2_10	Rpl13a2	5.68073		22.6829	0.974523
7_2_2	Rpl13a2	6.56596		11.4493	0.895384
7_2_3	Rpl13a2	6.72259		10.1448	0.973032
7_2_4	Rpl13a2	9.01973		1.72088	0.841464
7_2_5	Rpl13a2	5.4986		26.1088	0.929363
7_2_8	Rpl13a2	7.12703		7.42313	0.899095
7_2_L	Rpl13a2	4.37378		62.2394	0.706598
7_2_S	Rpl13a2	4.87055		42.4076	0.956849
7_3_1	Rpl13a2	4.86353		42.6381	0.954509
7_3_2	Rpl13a2	4.47582		57.5227	0.794553
7_3_3	Rpl13a2	6.79383		9.60166	0.991185
7_3_4	Rpl13a2	4.74063		46.8834	0.913543
7_3_5	Rpl13a2	8.7374		2.14016	1
7_3_L	Rpl13a2	4.41519		60.2804	0.758715
7_3_S	Rpl13a2	4.32808		64.4755	0.708092
8_1	Rpl13a2	4.53548		54.9325	0.822228
8_2	Rpl13a2	3.99357		83.482	0.664524
8_3	Rpl13a2	4.05464		79.6361	0.597162
C0	Rpl13a2	3.99444		83.4262	0.664813
C1	Rpl13a2	5.46162		26.8651	0.996239
C2	Rpl13a2	7.98791		3.81801	1
C3	Rpl13a2	10.0987		0.747916	0.901146
H2O	Rpl13a2	999		-1	0
1_1	sall4	11.8755		105.084	1
1_2	sall4	11.5825		124.638	0.966885
1_3	sall4	11.6273		121.427	0.993455
2_1	sall4	2.5		24700.6	0.08
2_2	sall4	12.6049		68.7192	0.940624
2_3	sall4	12.602		68.8356	0.971128
3_1	sall4	12.2411		84.9323	0.919857
3_2	sall4	11.7154		115.356	1
3_3	sall4	11.5183		129.385	0.973148
4_1	sall4	12.158		89.1442	0.948786
4_2	sall4	12.9965		54.706	1
4_3	sall4	11.6049		123.019	0.988288
5_1	sall4	11.5472		127.228	0.965707
5_2	sall4	11.9038		103.37	0.980722
5_3	sall4	12.2211		85.9284	0.905198
6_1	sall4	12.0185		96.6895	0.890098
6_2	sall4	12.3372		80.3113	0.957821
6_3	sall4	12.3125		81.4754	0.977077
7_1_2	sall4	12.409		77.0226	0.918652
7_1_3	sall4	12.9738		55.433	1
7_1_4	sall4	11.078		167.205	0.891452
7_1_5	sall4	12.892		58.1395	1
7_1_L	sall4	12.5365		71.5093	0.967625
7_1_S	sall4	10.8438		191.637	0.998147
7_2_1	sall4	16.388		7.59101	0.907869
7_2_10	sall4	12.4522		75.108	0.948528
7_2_2	sall4	14.5796		21.7593	0.902325
7_2_3	sall4	13.3518		44.4813	0.935084
7_2_4	sall4	16.0134		9.44133	0.866598
7_2_5	sall4	13.9474		31.4443	0.979146
7_2_8	sall4	15.4638		13.0028	0.970445
7_2_L	sall4	10.0677		301.127	0.873112
7_2_S	sall4	11.6412		120.449	0.986572
7_3_1	sall4	10.8306		193.108	0.99743
7_3_2	sall4	11.0838		166.642	0.889874
7_3_3	sall4	15.4202		13.3367	0.912389
7_3_4	sall4	10.8003		196.547	0.994013
7_3_5	sall4	17.7074		3.52046	0.998347
7_3_L	sall4	12.4121		76.882	0.945115
7_3_S	sall4	10.2016		278.542	0.916668
8_1	sall4	13.1951		48.7307	0.913205
8_2	sall4	12.4189		76.5776	0.950124
8_3	sall4	10.7206		205.887	0.993645
C0	sall4	12.2958		82.2726	0.932612
C1	sall4	14.5803		21.7507	1
C2	sall4	16.7711		6.07306	0.987412
C3	sall4	20.7779		0.588903	1
H2O	sall4	999		-1	0
1_1	spop	8.97842		116.732	1
1_2	spop	8.71823		141.46	1
1_3	spop	8.79985		133.186	1
2_1	spop	999		-1	0
2_2	spop	9.56587		75.6482	0.95331
2_3	spop	9.13252		104.177	0.909211
3_1	spop	9.39051		86.1062	0.943868
3_2	spop	8.70363		142.993	1
3_3	spop	8.38933		180.348	0.977506
4_1	spop	8.98443		116.215	1
4_2	spop	8.95427		118.832	1
4_3	spop	8.60071		154.284	1
5_1	spop	8.80616		132.567	1
5_2	spop	9.0887		107.603	0.902805
5_3	spop	9.3467		88.9373	0.924744
6_1	spop	9.24271		96.0362	0.927797
6_2	spop	8.72892		140.348	1
6_3	spop	8.95844		118.467	1
7_1_2	spop	10.8178		30.0125	1
7_1_3	spop	10.6026		35.1826	0.989531
7_1_4	spop	10.5211		37.365	0.955868
7_1_5	spop	9.61814		72.7838	0.995632
7_1_L	spop	9.4031		85.3097	0.973447
7_1_S	spop	9.33039		90.0153	0.96776
7_2_1	spop	13.0685		5.69516	0.882571
7_2_10	spop	11.4163		19.2918	0.956624
7_2_2	spop	12.7146		7.39594	0.962164
7_2_3	spop	13.5277		4.05748	0.938285
7_2_4	spop	15.5798		0.891523	0.965152
7_2_5	spop	11.53		17.7385	0.953312
7_2_8	spop	12.8369		6.75759	1
7_2_L	spop	8.98934		115.795	0.994364
7_2_S	spop	10.0409		53.2685	0.889298
7_3_1	spop	10.3721		41.711	0.926641
7_3_2	spop	10.3534		42.2894	0.96256
7_3_3	spop	13.2234		5.07983	0.934994
7_3_4	spop	10.6952		32.8566	1
7_3_5	spop	14.8482		1.53027	1
7_3_L	spop	9.93154		57.747	1
7_3_S	spop	9.73151		66.9387	0.982861
8_1	spop	9.27181		93.9942	0.930294
8_2	spop	9.43703		83.1984	0.972391
8_3	spop	9.07059		109.051	0.913183
C0	spop	9.16586		101.643	0.913838
C1	spop	11.1933		22.7457	0.960222
C2	spop	13.9616		2.94499	1
C3	spop	15.5082		0.939978	0.983508
H2O	spop	999		-1	0
1_1	tdg,1	9.87799		136.833	0.928845
1_2	tdg,1	9.98909		125.374	0.981523
1_3	tdg,1	9.65355		163.275	0.937319
2_1	tdg,1	2.9383		32260.8	0
2_2	tdg,1	10.9719		57.8372	0.914387
2_3	tdg,1	9.98913		125.37	0.928798
3_1	tdg,1	10.4986		83.951	0.926896
3_2	tdg,1	9.4029		198.889	0.906977
3_3	tdg,1	9.54076		178.436	0.930619
4_1	tdg,1	10.0539		119.141	0.901408
4_2	tdg,1	10.2377		103.092	0.903265
4_3	tdg,1	9.15204		242.31	0.888727
5_1	tdg,1	9.4967		184.732	0.902052
5_2	tdg,1	9.93174		131.164	1
5_3	tdg,1	10.0446		120.012	0.878306
6_1	tdg,1	9.64942		163.807	0.912702
6_2	tdg,1	9.72371		154.502	0.936386
6_3	tdg,1	10.1045		114.488	0.923929
7_1_2	tdg,1	10.6877		72.3394	0.929639
7_1_3	tdg,1	10.4903		84.5012	0.902094
7_1_4	tdg,1	10.2504		102.065	0.883528
7_1_5	tdg,1	9.76179		149.939	0.931472
7_1_L	tdg,1	10.2603		101.272	0.892988
7_1_S	tdg,1	9.42514		195.437	0.917681
7_2_1	tdg,1	13.2047		9.97445	0.878437
7_2_10	tdg,1	11.7197		32.103	0.932909
7_2_2	tdg,1	13.009		11.6354	0.809366
7_2_3	tdg,1	14.2369		4.42588	0.887
7_2_4	tdg,1	16.2458		0.910362	0.870674
7_2_5	tdg,1	12.2235		21.5945	0.875381
7_2_8	tdg,1	13.6618		6.96002	0.95386
7_2_L	tdg,1	8.84817		307.791	0.895583
7_2_S	tdg,1	10.3042		97.8291	0.893785
7_3_1	tdg,1	10.8346		64.4404	0.934763
7_3_2	tdg,1	9.76522		149.535	0.951486
7_3_3	tdg,1	12.8712		12.969	0.966208
7_3_4	tdg,1	10.6935		72.0117	0.934554
7_3_5	tdg,1	15.0145		2.39981	0.877709
7_3_L	tdg,1	10.4216		89.1948	0.922451
7_3_S	tdg,1	10.2358		103.242	0.880514
8_1	tdg,1	10.8417		64.0803	0.941445
8_2	tdg,1	10.6067		77.1023	0.926596
8_3	tdg,1	9.39398		200.29	0.905539
C0	tdg,1	10.159		109.68	0.886936
C1	tdg,1	12.1922		22.1323	0.931493
C2	tdg,1	14.9749		2.47564	0.992341
C3	tdg,1	16.0465		1.06498	0.852815
H2O	tdg,1	999		-1	0
1_1	tert	14.1206		135.169	0.965313
1_2	tert	13.3961		250.278	1
1_3	tert	13.2751		277.399	0.975254
2_1	tert	999		-1	0
2_2	tert	14.5266		95.7134	0.968345
2_3	tert	13.318		267.461	0.994327
3_1	tert	13.6145		207.866	1
3_2	tert	13.3997		249.527	1
3_3	tert	13.5168		225.881	1
4_1	tert	13.7819		180.294	1
4_2	tert	14.3633		109.966	0.99608
4_3	tert	12.7129		447.422	1
5_1	tert	13.8855		165.078	1
5_2	tert	13.2446		284.69	0.965348
5_3	tert	13.7048		192.502	1
6_1	tert	13.4559		237.874	0.997212
6_2	tert	12.9452		367.245	1
6_3	tert	13.4268		243.837	1
7_1_2	tert	15.2623		51.2005	0.944872
7_1_3	tert	12.9686		359.99	1
7_1_4	tert	13.506		227.96	0.987812
7_1_5	tert	13.2406		285.661	0.977802
7_1_L	tert	13.5028		228.586	0.999773
7_1_S	tert	12.645		474.017	1
7_2_1	tert	15.7215		34.6499	1
7_2_10	tert	14.942		67.2313	1
7_2_2	tert	17.8581		5.6323	0.983858
7_2_3	tert	15.4583		43.3399	0.976753
7_2_4	tert	18.0131		4.93675	0.92457
[truncated: 307 more rows]
