# Supplementary material for: In vivo targeted and deterministic single-cell malignant transformation
Source: eLife. 2025 Mar 25;13:RP97650. doi: 10.7554/eLife.97650 (PMC11936417; doi:10.7554/eLife.97650)
Supplement: Figure 1—figure supplement 5—source data 2. [file elife-97650-fig1-figsupp5-data2.xlsx]

## Sheet: Feuil1
	Controls			kRas activated		Ventx activated	kRas+Ventx activated
		+cCyc	+cCyc+Dex	+cCyc+UV	+cCyc+UV+Dex	+Ventx+Dex	+cCyc+UV+Ventx+Dex
	D<DCt>	D<DCt>	D<DCt>	D<DCt>	D<DCt>	D<DCt>	D<DCt>
foxo3a	0.0487202	0.0668136	-0.038849	-0.293119	-0.271524	-0.155891	-1.45158	foxo3a
Fgf8a	-0.0316562	-0.0379782	0.111695	-0.139967	0.0964819	-0.30456	-1.27611	Fgf8a
ved	-0.062319	0.0568515	0.0386794	-0.605958	-0.513675	-0.398839	-1.0367	ved
Igf1	0.0767806	0.0323541	0.0830996	0.126862	0.0245353	0.0774635	-0.974536	Igf1
lats1	0.0367348	-0.0366697	0.0387365	-0.0981405	-0.0924439	-0.233174	-0.88773	lats1
vent	-0.31692	-0.000355943	-0.0996175	-0.579512	-0.602491	0.0152255	-0.867309	vent
tet3	-0.0532106	0.0797005	0.0784039	-0.199527	-0.13183	-0.219439	-0.863216	tet3
dnmt3ab	-0.0357257	-0.00614877	0.118517	-0.306618	-0.141657	-0.209572	-0.732487	dnmt3ab
dnmt3aa	-0.0504544	-0.00791278	0.19925	-0.180456	-0.217342	-0.294477	-0.628815	dnmt3aa
ogt.1	0.00403322	-0.0164733	0.430024	0.189888	0.135001	0.0903849	-0.607597	ogt.1
Axin2	0.0860342	0.21936	-0.0133533	-0.0508562	-0.104414	-0.138752	-0.538733	Axin2
spop	-0.0300237	-0.0197264	0.120377	-0.0826334	0.027495	0.0789577	-0.491446	spop
kdm4b/jmjd2b	-0.145206	0.0800649	0.0979651	0.0614116	-0.108486	0.139577	-0.412006	kdm4b/jmjd2b
Rarab	0.0209956	0.0518492	0.0387881	-0.00784701	0.127543	0.142058	-0.32605	Rarab
cdkn2c	0.000835283	-0.104998	0.180455	-0.00585334	-0.138414	-0.200732	-0.297559	cdkn2c
vox	-0.117587	0.133985	0.0480486	-1.04509	-0.251505	-0.685831	-0.259211	vox
Ifg1rb	-0.0289123	0.0488348	0.16078	-0.0963886	-0.341849	0.280855	-0.246963	Ifg1rb
gadd45ab	0.211936	-0.142791	0.000837928	0.110408	-0.00336287	0.0129231	-0.144045	gadd45ab
kdm2aa	0.0374446	-0.00674834	0.172852	-0.027779	-0.0220773	0.0867608	-0.114357	kdm2aa
Igf1ra	0.0535046	-0.0467453	0.186847	0.0436399	0.0156151	0.306579	-0.0364383	Igf1ra
Fgfr4	0.0864969	0.0563115	0.00302499	0.0472928	-0.101783	0.0241378	-0.0295945	Fgfr4
mycb	0.183469	-0.116571	-0.0919373	0.0722831	-0.0817051	0.0422064	-0.0240433	mycb
Rpl13a1	0	0	0	0	0	0	0	Rpl13a1
Crabp2a	0.27397	0.0506446	0.0136983	0.343275	0.807448	-0.193584	0.0760313	Crabp2a
Rpl13a2	0.0112103	0.0105107	-0.00125625	-0.0356412	0.0610768	0.161298	0.0935654	Rpl13a2
neil1	0.142377	0.306304	-0.136999	-0.0588292	0.275602	0.0241335	0.0992005	neil1
xpc	0.198504	0.248808	0.149025	-0.326881	0.245048	-0.117565	0.144012	xpc
yap1	0.126637	-0.403201	0.0296551	0.0638266	-0.0259139	0.225476	0.322245	yap1
dnmt3ba	0.223205	0.0712122	-0.0229886	-0.00779784	0.177841	-0.0389306	0.362607	dnmt3ba
tdg.1	-0.0146472	0.0174393	0.175741	0.196957	0.201736	0.0814003	0.374644	tdg.1
Dusp6	-0.0063794	0.0089729	0.145712	0.180806	-0.0133835	0.459206	0.397476	Dusp6
hdac1	0.0160316	0.050545	0.126583	0.274386	0.36333	0.120168	0.459214	hdac1
mycla	0.111427	0.109094	0.00500269	-0.0165138	0.34671	-0.0679043	0.480061	mycla
Fgf4	0.0154698	0.0884877	0.106539	1.03585	0.50545	0.0623643	0.56129	Fgf4
jmjd6	0.379753	0.169448	0.231656	0.561245	0.537659	0.13119	0.834968	jmjd6
dnmt1	0.0312718	0.0495851	-0.00166177	-0.00155292	0.146168	0.0292197	0.857302	dnmt1
ezh2	0.0311523	0.11912	0.304658	0.428448	0.80784	0.123507	0.956713	ezh2
tert	-0.0967514	-0.00380474	0.045885	0.0846323	0.426625	-0.471192	1.04553	tert
Cyp26a1	0.315053	-0.039886	-0.190143	-0.167617	0.206062	-0.213339	1.08477	Cyp26a1
gadd45aa	0.070516	-0.057068	0.256475	0.700863	0.670467	0.779891	1.15113	gadd45aa
Crabp1b	0.16115	0.151988	0.0084768	0.476468	0.606192	0.202152	1.16391	Crabp1b
Aldh1a2	0.154478	-0.0161057	0.0691518	0.0704255	0.338003	-0.0720827	1.31733	Aldh1a2
sall4	0.237277	0.113399	-0.156063	0.237443	-0.0883031	0.357457	1.40375	sall4
actb1	-0.0833952	0.0373169	0.115047	0.662392	0.686518	0.013991	1.55352	actb1
dnmt3bb.1	0.331536	-0.127283	0.187091	0.452419	0.554407	0.381312	1.57769	dnmt3bb.1
lin28a	0.0604222	0.118127	0.127196	0.00370014	0.356826	-0.610714	1.95295	lin28a
pou5f3	-0.0230147	-0.158341	-0.305969	1.13983	-0.395495	1.11841	2.63507	pou5f3
nanog	0.202411	0.293433	0.149492	0.832437	0.931894	1.36785	3.17975	nanog
				reprogramming genes	stemness genes	oncosuppressor	epigenetic memory
